# Supplementary material for: Dyshomeostatic modulation of Ca2+-activated K+ channels in a human neuronal model of KCNQ2 encephalopathy
Source: eLife. 2021 Feb 5;10:e64434. doi: 10.7554/eLife.64434 (PMC7864629; doi:10.7554/eLife.64434)
Supplement: Figure 1—source data 1. [file elife-64434-fig1-data1.xlsx]

## Sheet: Figure 1 qPCR source data
Sample name	Cell line	DIV	Dif cohort	KCNQ2var2	KCNQ2var3	KCNQ2var4	KCNQ2var5	KCNQ3	KCNQ5
Q2-04 #11.1 d15	Q2-04	D15	#11.1	0.005	0.492	0.033	0.555	0.082	0.010769
Iso#4 #11.1 d15	Iso#4	D15	#11.1	0.005	0.592	0.057	0.667	0.084	0.008
Q2-04 #12.1 d15	Q2-04	D15	#12.1	0.033	0.561	0.347	0.149	0.268	0.009
Iso#4 #12.1 d15	Iso#4	D15	#12.1	0.032	0.561	0.311	0.238	0.243	0.01
Q2-04 #13.1 d15	Q2-04	D15	#13.1	0.026	0.536	0.366	0.266	0.235	0.017
Iso#4 #13.1 d15	Iso#4	D15	#13.1	0.013	0.576	0.335	0.294	0.319	0.019
Q2-04 #11.1 d32	Q2-04	D32	#11.1	0.007	0.714	0.116	0.791	0.149	0.012
Iso#4 #11.1 d32	Iso#4	D32	#11.1	0.008	0.391	0.118	0.356	0.173	0.012
Q2-04 #12.1 d32	Q2-04	D32	#12.1	0.015	0.202	0.153	0.103	0.131	0.014
Iso#4 #12.1 d32	Iso#4	D32	#12.1	0.01	0.258	0.125	0.164	0.102	0.018
Q2-04 #13.1 d32	Q2-04	D32	#13.1	0.014	0.288	0.198	0.125	0.163	0.014
Iso#4 #13.1 d32	Iso#4	D32	#13.1	0.009	0.239	0.15	0.121	0.159	0.014
Adult hBrain			Adult Brain	0.194	0.251	0.194	0.101	0.316	0.326
Fetal hBrain			Fetal Brain	0.162	1.024	0.413	1.004	0.448	0.113
Q2-04 #11.1 d15	Q2-04	D15	#11.1	0.005	0.481	0.037	0.468	0.068	0.009
Iso#4 #11.1 d15	Iso#4	D15	#11.1	0.005	0.644	0.047	0.659	0.09	0.008
Q2-04 #12.1 d15	Q2-04	D15	#12.1	0.033	0.479	0.264	0.154	0.235	0.007
Iso#4 #12.1 d15	Iso#4	D15	#12.1	0.032	0.499	0.272	0.237	0.216	0.008
Q2-04 #13.1 d15	Q2-04	D15	#13.1	0.026	0.448	0.344	0.257	0.211	0.013
Iso#4 #13.1 d15	Iso#4	D15	#13.1	0.013	0.511	0.288	0.273	0.316	0.017
Q2-04 #11.1 d32	Q2-04	D32	#11.1	0.007	0.663	0.092	0.723	0.127	0.011
Iso#4 #11.1 d32	Iso#4	D32	#11.1	0.008	0.32	0.085	0.363	0.129	0.015
Q2-04 #12.1 d32	Q2-04	D32	#12.1	0.012	0.191	0.13	0.108	0.109	0.014
Iso#4 #12.1 d32	Iso#4	D32	#12.1	0.011	0.258	0.125	0.156	0.078	0.016
Q2-04 #13.1 d32	Q2-04	D32	#13.1	0.009	0.251	0.184	0.14	0.147	0.014
Iso#4 #13.1 d32	Iso#4	D32	#13.1	0.009	0.22	0.131	0.137	0.144	0.017
Adult hBrain			Adult Brain	0.175	0.238	0.171	0.087	0.222	0.321
Fetal hBrain			Fetal Brain	0.132	0.976	0.334	0.87	0.464	0.105
