# Supplementary material for: Dyshomeostatic modulation of Ca2+-activated K+ channels in a human neuronal model of KCNQ2 encephalopathy
Source: eLife. 2021 Feb 5;10:e64434. doi: 10.7554/eLife.64434 (PMC7864629; doi:10.7554/eLife.64434)
Supplement: Figure 2—figure supplement 1—source data 1. [file elife-64434-fig2-figsupp1-data1.xlsx]

## Sheet: SupFigure 4 MEA D10_15_source d
Cell type	Differentiation	plate	Neuron count	D10 # of active electrodes	D11 # of active electrodes	D12 # of active electrodes	D13 # of active electrodes	D15 # of active electrodes	D10 Weighted Mean Firing Rate (Hz)	D11 Weighted Mean Firing Rate (Hz)	D12 Weighted Mean Firing Rate (Hz)	D13 Weighted Mean Firing Rate (Hz)	D15 Weighted Mean Firing Rate (Hz)
Q2-04	D11.1	3	397	2	3	4	12	24	0.038333	0.034444	0.070833	0.095	0.1875
Q2-04	D11.1	3	265	1	2	10	15	27	0.033333	0.353333	0.169333	0.145556	0.548519
Q2-04	D11.1	3	288	2	6	15	19	23	0.033333	0.129444	0.314667	0.105789	0.175507
Q2-04	D11.1	3	309	2	3	8	14	21	0.071667	0.1	0.114167	0.104286	0.510317
Q2-04	D11.1	3	298	2	5	5	20	28	0.066667	0.048	0.134667	0.0815	0.282619
Q2-04	D11.1	3	374	3	8	7	16	23	0.05	0.0925	0.106667	0.145208	0.236957
Iso #4	D11.1	3	368	0	0	3	5	12	0	0	0.256667	0.075333	0.173333
Iso #4	D11.1	3	295	1	1	2	4	8	0.156667	0.313333	0.038333	0.173333	0.073333
Iso #4	D11.1	3	303	1	0	1	2	5	0.03	0	0.03	0.03	0.254667
Iso #4	D11.1	3	275	0	1	5	10	21	0	0.09	0.123333	0.116	0.115714
Iso #4	D11.1	3	252	0	2	0	6	16	0	0.085	0	0.158889	0.266875
Iso #4	D11.1	3	223	0	0	5	7	16	0	0	0.123333	0.139048	0.241458
Q2-04	D11.1	4	279	0	0	7	16	26	0	0	0.189524	0.231458	0.340256
Q2-04	D11.1	4	287	2	4	10	17	24	0.152941	0.026667	0.202333	0.271373	0.41125
Q2-04	D11.1	4	403	0	1	8	12	20	0	0.03	0.064167	0.157222	0.1955
Q2-04	D11.1	4	291	1	5	11	15	18	0.088235	0.158	0.140909	0.152444	0.271667
Iso #4	D11.1	4	350	0	1	3	7	10	0	0.016667	0.063333	0.182857	0.361333
Iso #4	D11.1	4	368	0	1	1	10	15	0	0.016667	0.016667	0.165333	0.140444
Iso #4	D11.1	4	477	0	1	2	5	13	0	0.02	0.2	0.158	0.177692
Iso #4	D11.1	4	310	0	2	6	5	11	0	0.24	0.328333	0.122	0.426667
Iso #4	D11.1	4	319	0	0	3	2	9	0	0	0.043333	0.018333	0.448148
Iso #4	D11.1	4	397	0	1	5	8	19	0	0.06	0.138	0.221667	0.322632
Q2-04	D13.1	5	306	1	1	3	4	5	0.026667	0.026846	0.187778	0.048333	0.298667
Q2-04	D13.1	5	243	0	0	4	8	9	0	0	0.4275	0.106667	0.182593
Q2-04	D13.1	5	478	1	0	3	4	8	0.153333	0	0.11	0.073333	0.270417
Q2-04	D13.1	5	330	0	0	3	6	7	0	0	0.204444	0.221111	0.208095
Q2-04	D13.1	5	327	5	2	6	3	3	0.028	0.119128	0.045	0.132222	0.368889
Q2-04	D13.1	5	349	1	1	2	4	5	0.25	0.137584	0.075	0.125833	0.094667
Iso #4	D13.1	5	298	0	1	0	1	3	0	0.020134	0	0.063333	0.071111
Iso #4	D13.1	5	304	0	0	2	5	4	0	0	0.131667	0.233333	0.145833
Iso #4	D13.1	5	328	0	0	2	4	9	0	0	0.238333	0.246667	0.254074
Iso #4	D13.1	5	447	0	0	0	4	6	0	0	0	0.1025	0.254444
Iso #4	D13.1	5	332	0	0	5	5	9	0	0	0.277333	0.078	0.124444
Q2-04	D13.1	6	552	0	4	7	15	19	0	0.316667	0.08381	0.127556	0.109474
Q2-04	D13.1	6	495	2	3	11	16	21	0.033333	0.094444	0.193636	0.185625	0.309365
Q2-04	D13.1	6	598	1	2	17	16	20	0.023333	0.066667	0.177843	0.1125	0.224
Q2-04	D13.1	6	554	3	2	12	11	20	0.147778	0.051667	0.118056	0.214242	0.216833
Q2-04	D13.1	6	535	0	2	7	6	13	0	0.035	0.070476	0.135	0.149744
Q2-04	D13.1	6	587	0	4	13	10	21	0	0.2025	0.119231	0.132333	0.193492
Iso #4	D13.1	6	563	0	1	5	7	13	0	0.333333	0.098	0.168095	0.182051
Iso #4	D13.1	6	569	0	0	2	4	9	0	0	0.041667	0.039167	0.123333
Iso #4	D13.1	6	629	3	2	6	9	14	0.041111	0.09	0.081111	0.104074	0.109524
Iso #4	D13.1	6	504	1	2	3	9	6	0.016667	0.138333	0.06	0.124074	0.176667
Q2-04	D14.1	7	546	5	10	7	11	24	0.120667	0.185	0.235238	0.057879	0.430972
Q2-04	D14.1	7	686	6	8	12	11	23	0.081667	0.132917	0.100278	0.170909	0.367971
Q2-04	D14.1	7	544	3	7	13	21	28	0.027778	0.15619	0.340769	0.159365	0.384167
Q2-04	D14.1	7	681	1	7	8	8	16	0.036667	0.076667	0.239167	0.277917	0.465208
Q2-04	D14.1	7	550	4	3	11	25	29	0.0225	0.068889	0.203636	0.148267	0.749425
Q2-04	D14.1	7	405	2	2	7	6	22	0.018333	0.058333	0.195714	0.261667	0.303485
Iso #4	D14.1	7	401	1	3	6	11	19	0.016667	0.078889	0.125	0.146667	0.211579
Iso #4	D14.1	7	488	0	2	4	8	19	0	0.075	0.351667	0.088333	0.299298
Iso #4	D14.1	7	523	0	1	4	10	15	0	0.016667	0.1275	0.087	0.549111
Iso #4	D14.1	7	555	1	1	1	5	18	0.053333	0.023333	0.29	0.043333	0.187778
Iso #4	D14.1	7	487	2	2	5	14	19	0.063333	0.085	0.090667	0.160238	0.618772
Iso #4	D14.1	7	547	5	5	5	11	24	0.094	0.027333	0.112	0.223939	0.499861
Q2-04	D14.1	8	619	2	7	16	27	40	0.023333	0.496667	0.4025	0.210617	0.45225
Q2-04	D14.1	8	642	3	4	7	19	21	0.114444	0.03	0.185238	0.07193	0.304762
Q2-04	D14.1	8	613	6	6	14	11	30	0.044444	0.064444	0.215238	0.217576	0.278333
Q2-04	D14.1	8	601	6	10	17	16	28	0.242222	0.164	0.289216	0.417917	0.408929
Q2-04	D14.1	8	587	7	2	12	20	31	0.115714	0.238333	0.294167	0.350833	0.46871
Q2-04	D14.1	8	593	6	6	10	13	26	0.073333	0.057778	0.348	0.294359	0.548974
Iso #4	D14.1	8	486	1	2	6	5	16	0.08	0.215	0.259444	0.196667	0.181667
Iso #4	D14.1	8	596	1	3	4	9	21	0.056667	0.091111	0.5025	0.182963	0.220794
Iso #4	D14.1	8	614	2	0	8	13	21	0.018333	0	0.192083	0.081538	0.201905
Iso #4	D14.1	8	618	0	0	7	10	17	0	0	0.161429	0.128333	0.11902
Iso #4	D14.1	8	635	1	2	8	10	28	0.123333	0.023333	0.056667	0.123	0.383571
Iso #4	D14.1	8	620	1	1	3	4	16	0.046667	0.513333	0.317778	0.136667	0.232083
