# Supplementary material for: Dyshomeostatic modulation of Ca2+-activated K+ channels in a human neuronal model of KCNQ2 encephalopathy
Source: eLife. 2021 Feb 5;10:e64434. doi: 10.7554/eLife.64434 (PMC7864629; doi:10.7554/eLife.64434)
Supplement: Figure 2—source data 1. [file elife-64434-fig2-data1.xlsx]

## Sheet: Figure 2 MEAs D15_31 source dat
Cell type	Differentiation	plate	Neuron count	D15 Weighted Mean Firing Rate (Hz)	D17 Weighted Mean Firing Rate (Hz)	D19 Weighted Mean Firing Rate (Hz)	D22 Weighted Mean Firing Rate (Hz)	D24 Weighted Mean Firing Rate (Hz)	D26 Weighted Mean Firing Rate (Hz)	D29 Weighted Mean Firing Rate (Hz)	D31 Weighted Mean Firing Rate (Hz)	D15 ISI Coefficient of Variation - Avg	D17 ISI Coefficient of Variation - Avg	D19 ISI Coefficient of Variation - Avg	D22 ISI Coefficient of Variation - Avg	D24 ISI Coefficient of Variation - Avg	D26 ISI Coefficient of Variation - Avg	D29 ISI Coefficient of Variation - Avg	D31 ISI Coefficient of Variation - Avg	D15 # of bursts	D17 # of bursts	D19 # of bursts	D22 # of bursts	D24 # of bursts	D26 # of bursts	D29 # of bursts	D31 # of bursts	D15 Burst Frequency Hz	D17 Burst Frequency Hz	D19 Burst Frequency Hz	D22 Burst Frequency Hz	D24 Burst Frequency Hz	D26 Burst Frequency Hz	D29 Burst Frequency Hz	D31 Burst Frequency Hz	D15 Burst duration	D17 Burst duration	D19 Burst duration	D22 Burst duration	D24 Burst duration	D26 Burst duration	D29 Burst duration	D31 Burst duration	D15 # of Spikes per burst	D17 # of Spikes per burst	D19 # of Spikes per burst	D22 # of Spikes per burst	D24 # of Spikes per burst	D26 # of Spikes per burst
Q2-04	D11.1	3	397	0.1875	0.325444	0.242525	0.47	0.426599	0.385106	0.217185	0.305882	1.33118	1.87355	1.77382	2.0882	1.95204	1.90173	1.84522	1.51892	32	153	110	212	231	201	140	115	0.015238	0.031875	0.016667	0.022796	0.021389	0.020937	0.013725	0.020175	3.37738	2.21521	1.78767	1.50874	1.81719	1.79539	1.67449	2.08526	11.4505	9.16273	7.93988	11.8949	11.9437	10.6068
Q2-04	D11.1	3	265	0.548519	0.372368	0.497597	0.298837	0.44817	0.530355	0.40141	0.328444	1.66749	1.66003	1.81721	1.69579	1.49525	1.86748	2.15075	1.68637	192	136	199	129	178	252	257	149	0.049231	0.025185	0.022111	0.0172	0.019778	0.023333	0.024476	0.017738	4.50439	1.75439	3.48986	1.63099	1.76466	1.71927	1.39059	1.14679	13.3701	10.4601	13.8831	10.2379	10.7086	11.1632
Q2-04	D11.1	3	288	0.175507	0.399429	0.464444	0.348333	0.385679	0.466852	0.597024	0.450123	1.68999	1.95566	2.12738	2.04383	1.73996	2.06115	2.37815	1.74762	47	211	320	198	281	323	425	325	0.013056	0.03197	0.032323	0.020625	0.026762	0.028333	0.030797	0.027083	5.92711	3.81256	3.86776	1.9808	1.36661	1.33857	1.01697	1.2393	11.4833	10.2175	11.495	10.8747	9.09577	12.1582
Q2-04	D11.1	3	309	0.510317	0.272593	0.333111	0.525429	0.509825	0.354667	0.44305	0.49971	1.64415	1.61297	1.64795	1.90359	1.77442	1.90755	2.12793	1.90237	180	108	81	187	149	147	273	214	0.075	0.024	0.019286	0.028333	0.018395	0.018846	0.024595	0.019279	3.68483	3.41086	2.72323	1.55208	1.35689	1.72036	1.31129	1.45869	17.1878	7.98326	13.2408	12.3864	12.3596	10.7755
Q2-04	D11.1	3	298	0.282619	0.424731	0.538803	0.349145	0.86483	1.22486	1.26463	0.896374	1.65632	1.59196	1.61313	1.93708	2.15327	2.37268	3.18061	2.56637	73	89	113	169	434	573	622	686	0.022121	0.022821	0.022157	0.018778	0.036167	0.04775	0.043194	0.04971	3.73783	3.40675	2.86688	2.04517	1.58399	1.30531	0.927723	0.644069	12.5991	12.2777	15.3048	10.4753	13.831	16.3169
Q2-04	D11.1	3	374	0.236957	0.285556	0.412952	0.37725	0.612745	0.606463	0.621973	0.472109	1.49412	1.657	1.99597	2.00639	1.96992	1.92996	2.29315	1.9442	34	100	151	192	351	292	334	239	0.01619	0.025641	0.025167	0.0256	0.035455	0.027037	0.027833	0.020965	0.824958	1.57758	1.56141	1.73864	1.45018	1.68452	1.16597	1.028	8.23033	10.0191	14.3041	13.2367	14.8933	12.8777
Iso #4	D11.1	3	368	0.173333	0.23	0.311667	0.370833	0.549487	0.678917	0.575285	0.560079	1.25063	1.07883	1.23499	1.67135	1.46018	1.63826	1.82358	1.65309	1	9	63	133	170	220	349	359	0.003333	0.01	0.02625	0.023333	0.035417	0.043137	0.038778	0.046026	4.97744	0.519422	5.11418	1.69622	2.72658	3.67225	0.761966	0.570117	9	6.06667	10.9344	10.5032	9.84773	15.6695
Iso #4	D11.1	3	295	0.073333	0.27537	0.431429	0.255392	0.558824	0.58963	0.518455	0.36981	1.15022	1.5148	1.70487	1.54479	1.35297	1.97848	2.0202	1.43936	1	26	96	94	182	254	273	178	0.003333	0.014444	0.029091	0.022381	0.033704	0.036812	0.035	0.028254	6.91504	9.99697	8.13273	1.63825	0.650752	1.48358	1.16183	0.75276	17	19.4481	19.7468	8.28377	8.63353	12.9496
Iso #4	D11.1	3	303	0.254667	0.208039	0.194722	0.405	0.716667	0.388254	0.465135	0.530769	1.52334	1.13961	1.19386	1.39052	1.4408	1.39547	1.60003	1.52559	4	25	48	86	106	108	181	188	0.013333	0.041667	0.022857	0.020476	0.025238	0.0225	0.030167	0.025067	12.8892	18.8648	0.544204	1.48742	2.9268	4.94247	1.30015	0.846808	26	12.958	6.00691	8.9178	16.9041	15.3848
Iso #4	D11.1	3	275	0.115714	0.222151	0.217097	0.32386	0.665833	0.954318	1.01157	0.263043	1.33689	1.26536	1.61518	1.4451	1.61315	1.7905	2.03886	1.40559	10	45	75	92	215	254	379	122	0.008333	0.01875	0.019231	0.018039	0.031159	0.030238	0.035093	0.012708	4.78971	1.35942	2.11808	1.63531	1.38492	2.39147	1.16283	1.0157	9.64583	6.71375	9.78728	9.41848	10.4992	12.3847
Iso #4	D11.1	3	252	0.266875	0.219206	0.183333	0.294957	0.735	0.649524	0.702639	0.372333	1.06827	1.29086	1.1264	1.30816	1.32282	1.29825	1.72068	1.43147	49	46	32	90	99	106	450	193	0.081667	0.051111	0.017778	0.021429	0.025385	0.014722	0.045455	0.021444	6.63699	0.203098	3.0049	1.50998	1.19587	2.47391	0.687205	0.579802	12.2872	5.0095	5.96667	10.0885	11.3743	11.9533
Iso #4	D11.1	3	223	0.241458	0.304035	0.373077	0.352667	0.458438	0.381765	0.579111	0.28086	1.63001	1.80424	1.58901	1.5203	1.50838	1.58004	1.73533	1.37679	39	146	149	84	69	85	103	50	0.026	0.044242	0.038205	0.0175	0.019167	0.025758	0.024524	0.011111	2.47474	1.08683	3.0118	0.835745	1.92184	4.41881	2.32262	2.93278	11.2242	10.6974	7.24472	8.2887	15.1065	15.2198
Q2-04	D11.1	4	279	0.340256	0.370323	0.592137	0.822762	1.47159	1.2623	0.754144	0.713509	1.49033	1.47311	1.89906	1.94031	2.01598	2.16211	2.58985	1.95997	46	106	263	297	396	382	258	237	0.013939	0.027179	0.039848	0.038077	0.042581	0.042444	0.027742	0.030385	5.25768	0.810892	4.34818	1.41315	2.2594	1.55565	1.4791	1.43414	9.4982	6.89947	17.2861	11.8906	17.2836	18.5772
Q2-04	D11.1	4	287	0.41125	0.436204	0.44375	0.748261	1.15951	1.22897	0.674753	0.777818	1.44045	1.56763	1.55159	1.68002	1.48445	2.0143	2.23154	2.11236	69	101	160	258	243	395	358	359	0.025556	0.028056	0.033333	0.029655	0.0324	0.048765	0.028413	0.029917	14.4338	2.60472	0.881499	2.96504	0.989172	1.49196	1.43234	1.48108	19.4405	11.6609	10.4115	14.1948	10.8979	16.9121
Q2-04	D11.1	4	403	0.1955	0.415104	0.359074	0.54561	0.663551	0.581407	0.698014	0.668794	1.32115	1.49895	1.51088	1.80554	1.53963	1.6881	2.13833	2.03517	57	57	136	270	212	267	366	385	0.02375	0.014615	0.025185	0.036	0.026173	0.02871	0.033889	0.033772	1.24215	5.3619	4.19213	4.07824	1.64099	3.75801	1.39537	1.155	6.22064	11.4344	17.3897	13.7968	11.6118	14.7274
Q2-04	D11.1	4	291	0.271667	0.418205	0.897333	1.24102	1.41234	0.933876	0.513407	0.844574	1.14558	1.45958	1.78252	1.89427	1.52953	1.91112	1.90043	2.00421	14	86	201	251	242	238	262	358	0.011667	0.026061	0.0335	0.036377	0.032267	0.030513	0.028172	0.034095	14.1951	8.78068	1.3296	1.42903	1.9003	1.76192	1.52403	1.04659	29.5556	22.4541	10.7481	15.0709	13.9435	14.5384
Iso #4	D11.1	4	350	0.361333	0.182222	0.240417	0.150238	0.311313	0.331778	0.23908	0.255556	1.59274	1.58276	1.43954	1.36471	1.17129	1.57692	1.25745	1.21792	40	15	64	24	17	99	59	40	0.066667	0.01	0.019394	0.011429	0.011333	0.04125	0.015128	0.014815	1.686	3.43888	2.41279	4.88047	0.995737	1.11109	1.06719	1.72726	14.2	11.68	8.03537	9.53061	8.75333	11.8225
Iso #4	D11.1	4	368	0.140444	0.287667	0.255	0.333411	0.4806	0.489242	0.383333	0.463761	1.24515	1.3351	1.25008	1.32013	1.38656	1.389	1.23959	1.34558	27	48	40	69	137	157	109	167	0.0225	0.026667	0.012121	0.012778	0.017564	0.022754	0.022708	0.024203	2.45538	1.69418	1.54253	2.05511	1.75838	1.96991	0.952246	0.826319	7.88333	11.8508	8.09524	9.49637	9.35429	11.0179
Iso #4	D11.1	4	477	0.177692	0.2075	0.275583	0.267607	0.540635	0.368222	0.331894	0.406504	1.39188	1.21988	1.47906	1.30307	1.38753	1.64076	1.57232	1.5833	16	32	38	84	109	140	142	199	0.013333	0.017778	0.011515	0.021538	0.020185	0.019444	0.018933	0.024568	5.86242	11.1488	9.62405	5.2773	8.22754	6.16482	3.0891	0.670176	7	16.0347	28.4242	14.4435	34.1373	14.5097
Iso #4	D11.1	4	310	0.426667	0.258413	0.377172	0.365299	0.550272	0.686042	0.575833	0.643946	1.46522	1.63244	1.36839	1.32673	1.19029	1.34831	1.64399	1.71943	27	67	82	117	117	205	383	341	0.03	0.031905	0.034167	0.027857	0.020526	0.02971	0.039896	0.031574	1.75696	0.962816	3.16015	2.51703	2.02792	1.74693	1.13977	0.999973	9.30702	6.48878	11.7267	11.1171	10.4849	10.1912
Iso #4	D11.1	4	319	0.448148	0.347018	0.5285	0.390606	0.565379	0.631087	0.332857	0.494634	1.45928	1.38539	1.4578	1.20634	1.15817	1.20994	1.24259	1.49022	54	77	83	79	147	120	67	131	0.06	0.051333	0.069167	0.021944	0.049	0.022222	0.013958	0.017467	0.32282	0.680361	5.72686	4.45426	1.11021	1.77911	1.54506	1.38663	5.56525	10.4881	22.9487	10.5846	10.2536	10.3676
Iso #4	D11.1	4	397	0.322632	0.353563	0.733623	0.954167	1.88804	2.17316	1.11063	1.39534	1.08862	0.983411	1.25764	1.21035	1.2354	1.19357	1.71711	1.57485	48	47	104	178	167	162	457	401	0.08	0.026111	0.020392	0.02697	0.026508	0.0216	0.029295	0.027279	0.317181	0.382137	5.89176	1.52898	1.65961	1.01222	1.08635	2.91158	5.64773	5.11307	18.8625	12.5608	15.6984	13.8626
Q2-04	D13.1	5	306	0.298667	0.589444	0.707333	0.421176	0.564706	0.417778	0.857037	0.541429	2.23487	2.43227	1.86142	1.61621	2.1131	1.7137	2.14087	1.51605	5	48	48	59	114	74	161	124	0.008333	0.04	0.053333	0.028095	0.038	0.035238	0.041282	0.037576	3.55621	0.966471	0.918923	1.25814	1.38535	0.795185	1.66238	0.688753	20.75	15.4544	14.2361	10.8261	12.2387	10.6302
Q2-04	D13.1	5	243	0.182593	0.25	0.584667	0.500926	0.548056	0.862874	0.768387	1.10576	0.892614	1.41057	2.11296	2.31944	2.17766	2.09076	1.87872	1.93676	3	19	44	141	141	267	224	312	0.005	0.015833	0.020952	0.042727	0.029375	0.046842	0.046667	0.043333	0.70356	1.02567	1.80237	1.47568	1.032	1.14804	1.39156	1.59132	4.75	7.05909	10.0976	10.8245	13.2961	11.4723
Q2-04	D13.1	5	478	0.270417	0.174444	0.335	0.491944	0.629583	0.576667	0.578966	0.595143	1.08349	1.75299	1.36337	1.60506	2.20831	1.64057	1.92669	2.13288	20	16	4	47	125	150	135	225	0.066667	0.013333	0.006667	0.026111	0.034722	0.055556	0.025	0.035714	0.801236	0.810161	0.67852	1.28834	1.47619	1.10693	1.40294	1.37843	9	6.4375	5.66667	12.0333	11.1421	11.6537
Q2-04	D13.1	5	330	0.208095	0.252708	0.28549	0.329405	0.375591	0.642525	0.708919	0.863258	1.68036	2.24182	1.79668	1.86174	2.17341	2.50467	2.2787	2.2612	26	74	70	165	161	325	384	392	0.028889	0.024667	0.025926	0.039286	0.024394	0.041667	0.044138	0.042151	2.22318	1.29375	0.941766	1.01142	1.33838	0.901148	1.20747	1.26619	9.16937	8.48347	9.60979	8.44133	10.1942	11.4851
Q2-04	D13.1	5	327	0.368889	0.1975	0.28381	0.507	0.851014	0.474533	0.579778	1.21226	1.36642	1.38651	2.63916	2.10427	2.21049	1.7623	1.87422	1.99002	1	51	19	166	187	147	211	275	0.003333	0.0425	0.015833	0.039524	0.044524	0.035	0.039074	0.053922	0.99016	0.632567	0.553485	1.11295	1.65846	1.24623	1.14286	1.49392	8	7.22353	15.1833	9.73315	13.7311	10.6879
Q2-04	D13.1	5	349	0.094667	0.28619	0.496667	0.549167	0.389333	0.374872	0.7175	1.21676	1.50054	1.21449	1.53326	1.39136	1.73767	1.74512	1.92312	1.83373	12	20	19	38	76	52	171	188	0.02	0.033333	0.021111	0.018095	0.025333	0.019259	0.033529	0.034815	0.454351	0.89256	3.01232	1.57911	1.082	0.871217	1.21643	1.02958	5.77778	7.52632	14.3125	9.56349	7.58777	7.38386
Iso #4	D13.1	5	298	0.071111	0.205833	0.128889	0.465152	0.314949	0.479032	0.7	0.432033	0.746614	0.942227	0.881394	1.1188	1.41068	1.43754	1.45174	1.33676	0	1	0	23	80	121	218	168	0	0.003333	0	0.038333	0.016667	0.031026	0.034603	0.031111	0	0.6548	0	0.333092	1.35852	0.836584	0.621896	0.473459	0	6	0	6.17424	6.56741	7.60085
Iso #4	D13.1	5	304	0.145833	0.078	0.314815	0.268333	0.257778	0.284405	0.32404	1.03613	1.23535	0.990447	1.17095	1.69488	1.46207	1.17968	1.24978	1.2273	1	0	28	65	83	28	35	94	0.003333	0	0.046667	0.030952	0.027667	0.013333	0.012963	0.039167	12.3443	0	1.52552	1.06797	1.71015	0.466385	1.14866	2.52258	16	0	9.71333	9.0413	8.53282	5.42381
Iso #4	D13.1	5	328	0.254074	0.340392	0.13619	0.282222	0.504333	0.556078	0.983684	1.19639	1.36391	1.375	1.4546	1.66361	1.61449	1.36397	1.67892	1.4828	30	17	6	55	74	93	147	203	0.05	0.011333	0.006667	0.030556	0.027407	0.062	0.049	0.061515	0.354603	0.822502	0.413164	1.2932	1.21714	0.620408	0.805309	1.05817	5.20833	7.24	4.94444	7.988	10.3051	8.52453
Iso #4	D13.1	5	447	0.254444	0.13	0.158718	0.258444	0.350952	0.3	0.279222	0.581605	1.43336	1.52497	1.21467	1.35986	1.23018	1.48696	1.59632	1.64416	3	9	18	20	39	40	49	71	0.005	0.0075	0.02	0.016667	0.026	0.016667	0.014848	0.03381	0.2385	0.29154	1.11598	0.844931	2.20127	0.520775	1.72231	1.93919	7	7.25	6.31111	8.02922	19.2762	6.48438
Iso #4	D13.1	5	332	0.124444	0.143636	0.226111	0.389231	0.701923	0.581304	0.540805	0.882846	1.31984	1.19802	1.01606	1.04765	1.27277	1.19732	1.34281	1.28468	0	3	3	35	116	21	131	75	0	0.005	0.01	0.029167	0.038667	0.01	0.03359	0.019231	0	1.83338	6.57229	0.284833	0.489305	0.597187	0.98744	0.96352	0	5	9	5.01515	7.77738	6.19048
Q2-04	D13.1	6	552	0.109474	0.115333	0.228947	0.179467	0.242899	0.174127	0.113684	0.180725	1.4946	1.564	1.56239	1.73828	1.81346	1.60995	1.56428	1.79415	35	23	66	81	85	71	26	58	0.023333	0.012778	0.016923	0.024545	0.018889	0.015778	0.007222	0.014872	9.75647	1.0798	0.945774	2.00496	1.67677	1.17137	2.3628	2.07063	15.055	6.63889	6.35073	9.19508	7.93073	6.35373
Q2-04	D13.1	6	495	0.309365	0.264792	0.22381	0.382533	0.272024	0.530595	0.387863	0.45575	2.06604	2.02259	1.98413	2.38508	2.37505	2.46768	2.0195	1.94341	65	67	92	135	110	200	150	172	0.021667	0.017179	0.02359	0.0225	0.021569	0.028986	0.017241	0.01977	2.89884	1.14477	1.22796	1.985	2.1989	1.39484	2.24111	2.07998	13.5901	7.53917	9.65588	11.4146	14.9053	12.3221
Q2-04	D13.1	6	598	0.224	0.210476	0.261264	0.222883	0.227407	0.215287	0.360968	0.398046	1.82918	2.36943	2.13534	2.03861	2.29344	1.93841	2.31754	1.86732	71	116	121	145	116	135	171	139	0.018205	0.021481	0.021228	0.01859	0.017576	0.023684	0.0285	0.024386	3.1494	0.752968	1.70344	1.26768	1.35955	0.896395	1.46933	1.82491	8.2108	8.80982	10.2103	7.79986	9.1726	7.67215
Q2-04	D13.1	6	554	0.216833	0.368333	0.278667	0.219462	0.279247	0.245747	0.305185	0.482952	2.08061	2.14161	1.70935	1.93413	1.90186	1.65096	1.86532	2.03275	69	118	74	103	113	108	143	247	0.023	0.039333	0.020556	0.016349	0.018833	0.02	0.019861	0.029405	3.86999	2.00113	1.26914	1.51555	1.21907	0.929347	1.59994	1.54659	9.91466	14.301	9.29226	8.64417	9.11586	7.64211
Q2-04	D13.1	6	535	0.149744	0.25303	0.290635	0.368966	0.2825	0.432963	0.39899	0.401441	1.84095	2.15441	2.07706	2.17079	2.06191	1.6723	1.96679	1.84357	28	114	122	172	149	182	150	158	0.015556	0.029231	0.025417	0.027302	0.02614	0.030333	0.021739	0.023939	1.83035	3.12504	1.04917	1.59781	1.24793	1.6567	1.63205	3.70222	6.80833	12.102	7.96845	10.5099	9.69379	10.7098
Q2-04	D13.1	6	587	0.193492	0.256444	0.290385	0.218778	0.264902	0.332258	0.448333	0.691783	1.5135	1.9839	2.04514	1.94774	2.48583	2.00029	2.26194	2.4748	56	61	112	99	148	164	225	393	0.020741	0.022593	0.024889	0.020625	0.018272	0.026032	0.024194	0.038529	1.1378	0.92282	1.2266	2.33347	1.8822	1.41446	1.60099	1.45598	6.41204	8.65076	9.93194	10.7104	10.0158	11.5661
Iso #4	D13.1	6	563	0.182051	0.132917	0.183158	0.1705	0.160317	0.245714	0.265439	0.204545	1.18237	1.06279	1.17376	1.13715	1.33323	1.23064	1.22313	1.27998	20	1	6	5	18	28	18	12	0.016667	0.003333	0.005	0.004167	0.015	0.011667	0.01	0.005714	11.0282	0.16184	0.61414	2.2924	3.47845	2.73831	1.47759	3.67091	16.4688	5	4.875	7.75	8.00641	8.53276
Iso #4	D13.1	6	569	0.123333	0.131026	0.146667	0.236471	0.095455	0.122941	0.206167	0.245972	1.14435	1.77721	1.6786	1.38954	1.33718	1.55558	1.19416	1.36887	4	22	28	46	13	13	11	103	0.013333	0.014667	0.018667	0.025556	0.007222	0.007222	0.006111	0.038148	0.24652	0.48942	0.659143	0.99053	6.21408	1.2962	1.50325	0.716425	6	9.09	5.40714	6.62619	8.21667	8.46667
Iso #4	D13.1	6	629	0.109524	0.135833	0.110167	0.161667	0.3425	0.206282	0.345072	0.188	1.32132	1.73333	1.36965	1.47377	1.56545	1.38043	1.21579	1.02663	3	42	17	61	67	40	13	1	0.005	0.0175	0.014167	0.020333	0.013958	0.011111	0.005417	0.003333	6.27944	4.49249	0.357371	0.495182	1.38869	1.15319	2.52447	0.44104	7.5	9.66563	5.1	6.05864	11.7421	6.76726
Iso #4	D13.1	6	504	0.176667	0.280417	0.190784	0.158056	0.132267	0.140625	0.185641	0.164333	1.5538	1.49003	1.64414	1.23219	1.26534	1.24232	1.41809	1.46813	19	23	51	52	10	40	74	52	0.015833	0.015333	0.015455	0.024762	0.004762	0.014815	0.018974	0.014444	4.01531	1.08606	0.413037	3.65246	1.71419	2.03478	2.2794	0.753051	7.42262	14	5.15098	8.72577	6.78571	7.15046
Q2-04	D14.1	7	546	0.430972	0.443222	0.35	0.621441	1.30988	0.96202	0.996765	0.807456	1.4623	1.3461	1.51692	1.60615	1.76675	2.20835	2.36357	2.17656	72	117	59	237	309	350	363	356	0.018462	0.03	0.017879	0.034348	0.054211	0.055556	0.046538	0.053939	1.07879	1.31333	0.900567	1.02919	1.24409	1.28935	1.20867	1.0965	8.33625	8.3955	8.89378	8.62052	12.2648	15.4674
Q2-04	D14.1	7	686	0.367971	0.402451	0.640667	0.502602	0.442093	0.542991	0.607259	0.906478	1.58815	1.48664	1.70996	1.70272	1.78061	1.90941	1.98767	2.48344	62	117	154	242	218	268	308	649	0.029524	0.022941	0.025667	0.029877	0.029067	0.027917	0.030196	0.047029	0.849942	1.16396	0.716798	0.93852	1.23246	1.46226	1.03617	0.788111	11.0025	6.37333	8.63112	8.46395	9.17209	9.98293
Q2-04	D14.1	7	544	0.384167	0.515983	0.472883	0.601712	0.636992	0.58036	0.616126	1.13611	1.44675	1.35898	1.67249	1.85353	1.91934	1.90666	1.77854	1.91501	135	185	197	313	300	248	208	325	0.040909	0.036275	0.029848	0.037262	0.03125	0.030617	0.028889	0.036111	0.742485	1.35159	1.32932	1.42873	1.59886	1.60259	1.72093	1.52993	7.49275	9.84018	9.05501	8.80072	10.6004	10.4374
Q2-04	D14.1	7	681	0.465208	0.486923	0.45746	0.388851	0.414643	0.563333	0.703636	0.893417	1.55886	1.42375	1.67176	1.41825	1.62326	1.83174	2.1912	2.2086	38	87	120	74	110	211	279	464	0.031667	0.026364	0.026667	0.017619	0.024444	0.03197	0.034444	0.049892	0.709431	1.0059	1.5195	1.60427	1.59245	1.22712	1.0325	0.791307	5.775	8.2406	8.08571	10.7715	9.6801	9.75994
Q2-04	D14.1	7	550	0.749425	1.12394	0.590769	0.857982	0.990789	0.791938	1.56661	1.91249	1.48061	1.41379	1.5356	1.80003	1.74211	2.03317	2.23796	2.5261	127	192	166	332	219	381	680	994	0.042333	0.042667	0.030741	0.044267	0.038421	0.042333	0.051515	0.061358	1.25699	0.990313	0.892746	1.08058	2.70729	1.5744	1.39344	1.20223	11.2788	11.6724	9.85928	10.8104	14.5116	13.4872
Q2-04	D14.1	7	405	0.303485	0.503175	0.400145	0.653431	0.645	0.832353	0.801111	0.984333	1.3425	1.48354	1.46093	1.73297	1.89478	2.02134	2.44851	2.35923	76	78	69	279	270	321	337	427	0.042222	0.021667	0.023	0.058125	0.040909	0.046522	0.040119	0.044479	1.60754	1.75411	1.2801	0.988328	1.92534	1.26653	1.12069	0.887751	8.75556	9.83154	8.76056	11.8609	11.573	12.7272
Iso #4	D14.1	7	401	0.211579	0.621014	0.67284	0.286556	0.259	0.126825	0.236316	0.316957	1.23272	1.36479	1.62046	1.51113	1.96614	1.36361	1.53035	1.46066	38	30	100	101	55	30	39	78	0.042222	0.014286	0.033333	0.024048	0.02037	0.016667	0.018571	0.026	0.473308	0.656372	1.08405	0.667955	2.98382	1.71759	1.80934	0.873461	7.26323	7.88972	11.135	6.33291	10.312	6.09583
Iso #4	D14.1	7	488	0.299298	0.470595	0.443437	0.298286	0.324667	0.450222	0.540476	0.387905	1.15499	1.32288	1.32008	1.27956	1.22957	1.47336	1.68612	1.21856	43	158	74	42	36	98	206	108	0.047778	0.047879	0.024667	0.0175	0.013333	0.021778	0.038148	0.032727	1.18245	1.20117	0.988868	1.2483	4.10685	1.11901	0.853378	0.75297	8.65	7.23062	8.47433	9.71385	12.1074	9.39481
Iso #4	D14.1	7	523	0.549111	0.430758	0.211833	0.459785	0.434444	0.433438	0.371532	0.448293	1.47445	1.398	1.27425	1.43906	1.44742	1.51397	1.46464	1.61834	89	70	26	99	155	107	146	368	0.049444	0.038889	0.010833	0.0275	0.036905	0.018772	0.021159	0.03957	2.53561	5.6532	1.54664	2.65385	1.88602	1.34977	1.05888	0.660505	10.9387	14.0263	8.83333	9.98839	9.14872	8.9977
Iso #4	D14.1	7	555	0.187778	0.523768	0.261146	0.752137	0.780702	0.797027	1.18406	0.857619	1.15571	1.49678	1.29529	1.40891	1.43458	1.39314	1.606	1.47181	14	28	30	135	182	115	308	306	0.046667	0.015556	0.0125	0.026471	0.046667	0.023958	0.042778	0.048571	0.360463	0.9074	2.10246	2.07225	0.623347	1.16748	1.78892	0.82061	7	7.8578	7.8817	11.2122	10.1242	9.25064
Iso #4	D14.1	7	487	0.618772	0.500208	0.457241	0.632727	0.951204	0.873333	1.06587	1.09955	1.10886	1.10283	1.23588	1.4049	1.52484	1.55526	1.75909	1.82505	3	37	57	106	149	260	436	673	0.005	0.015417	0.027143	0.032121	0.02614	0.033333	0.045417	0.06598	0.45956	2.21965	1.0315	1.80047	2.02515	0.830941	0.790646	1.26506	7.75	12.1073	9.38889	11.2138	11.3611	9.70533
Iso #4	D14.1	7	547	0.499861	0.729333	0.668922	1.09778	1.36748	1.11187	1.43255	1.29433	1.02255	1.16223	1.2225	1.35531	1.29057	1.37981	1.5506	1.65772	19	92	116	185	244	246	466	748	0.021111	0.025556	0.032222	0.041111	0.047843	0.037273	0.055476	0.075556	0.779589	0.767293	0.634218	0.694366	1.78067	0.663436	0.632578	0.529696	6.70563	8.68353	8.44033	8.84478	9.64581	11.6209
Q2-04	D14.1	8	619	0.45225	0.873254	0.671667	1.14804	1.74609	1.29554	1.55409	2.2378	1.65216	1.55141	1.96918	2.25359	2.11316	2.1993	2.76039	2.61608	283	298	319	445	731	668	910	1321	0.049649	0.052281	0.037976	0.044949	0.056667	0.046389	0.059477	0.084679	1.01021	0.898721	1.01906	1.55519	1.57845	1.34277	1.07137	0.742544	7.99528	10.7981	10.7449	14.6697	14.6807	14.626
Q2-04	D14.1	8	642	0.304762	0.400714	0.432982	0.703089	1.03964	0.79363	0.68037	1.24012	1.73009	1.85227	1.85195	2.07527	1.98516	2.29762	2.43788	3.0029	53	113	205	403	507	483	472	689	0.01963	0.020926	0.035965	0.041979	0.046944	0.044722	0.038374	0.052197	0.907451	2.62052	2.37314	1.09361	1.07816	1.4227	1.15337	1.03561	12.9753	10.2999	12.6654	10.938	10.2755	12.8674
Q2-04	D14.1	8	613	0.278333	0.435476	0.601894	1.38015	1.07783	1.28508	1.02958	1.09057	1.83462	1.70674	1.9496	1.98989	1.8237	2.3725	2.41151	2.45845	113	251	344	426	409	598	548	710	0.028974	0.041833	0.042469	0.038378	0.043978	0.05537	0.04807	0.050355	1.41046	1.13814	1.14116	2.1861	1.14657	1.0388	1.06827	0.990099	9.22541	10.6487	12.0582	13.8381	11.3699	13.6678
Q2-04	D14.1	8	601	0.408929	0.541143	0.500088	0.727801	1.58503	0.9996	1.41457	1.83592	1.88176	1.7002	2.19305	2.18844	2.09817	2.28348	2.46049	2.45846	135	231	311	437	732	607	726	1042	0.040909	0.036667	0.038395	0.040463	0.061	0.045985	0.0484	0.068105	0.776034	0.725085	2.79399	1.63336	1.09622	1.40267	1.15016	0.927863	7.91514	7.55821	11.5428	10.942	13.5883	13.083
Q2-04	D14.1	8	587	0.46871	0.839649	0.902222	1.80265	2.59827	1.33942	2.49146	3.18707	1.55031	1.89311	2.12559	2.02628	1.74573	2.11963	2.40389	2.71421	121	283	321	494	422	551	944	1291	0.040333	0.036282	0.036897	0.039206	0.04019	0.041742	0.064218	0.084379	2.7142	0.951443	1.35214	1.15394	2.87571	1.73399	1.23779	0.991061	9.42749	8.36194	10.9359	13.6409	17.8267	17.2218
Q2-04	D14.1	8	593	0.548974	0.33009	0.444091	0.90619	1.65433	1.23899	1.71279	2.64105	1.51101	1.76535	1.83794	1.83652	1.82458	2.25132	3.09485	3.64795	109	163	273	360	482	481	813	994	0.03303	0.025873	0.035	0.035294	0.042281	0.040083	0.0542	0.064967	0.843995	0.741156	2.29761	1.13531	1.12795	1.49068	1.03513	0.916635	7.8092	6.77242	9.63673	10.7419	13.3454	15.5587
Iso #4	D14.1	8	486	0.181667	0.350784	0.194583	0.450972	0.284333	0.346667	0.389	0.466847	1.02824	1.46669	1.38043	1.54292	1.27194	1.42529	1.45214	1.31854	4	62	39	95	66	91	137	118	0.006667	0.025833	0.014444	0.031667	0.018333	0.020222	0.028542	0.024583	15.5994	2.98467	6.96616	0.684438	2.28207	1.24921	0.814099	0.889005	23	9.54098	12.0651	7.82049	7.01499	8.15571
Iso #4	D14.1	8	596	0.220794	0.474667	0.458817	0.977	0.988116	1.02303	1.36199	1.86094	1.41414	1.31754	1.35839	1.50316	1.35875	1.59461	1.57228	1.43048	81	149	80	267	301	340	381	289	0.038571	0.049667	0.026667	0.046842	0.052807	0.04359	0.037353	0.035679	0.7018	0.470826	0.480819	3.29736	0.411072	0.714147	0.762288	0.697254	6.68019	7.19968	6.26286	15.5803	8.49548	9.51123
Iso #4	D14.1	8	614	0.201905	0.195444	0.21045	0.420519	0.336583	0.522778	0.422137	0.444017	1.30321	1.28096	1.36389	1.62495	1.47443	1.71521	1.67981	1.53486	24	41	107	218	164	243	203	203	0.02	0.015185	0.025476	0.026914	0.028772	0.035217	0.028194	0.02942	0.463503	0.74894	0.789313	1.24423	1.11789	1.7746	1.32305	0.938558	7.12311	5.65123	6.62059	8.08647	8.76263	10.0418
Iso #4	D14.1	8	618	0.11902	0.175402	0.221222	0.417843	0.394419	0.459024	0.645833	0.573718	1.1746	1.30911	1.54083	1.73298	1.72191	1.76082	1.8655	1.86864	10	16	114	152	305	320	395	403	0.005556	0.007619	0.027143	0.02303	0.044203	0.036782	0.039899	0.03951	2.20318	0.636116	0.746204	2.29795	0.538795	0.822098	1.06266	1.30134	5.1	4.74286	6.02182	14.5944	7.91635	7.41134
Iso #4	D14.1	8	635	0.383571	0.53172	0.503714	0.83725	1.078	0.756957	0.951067	1.13025	1.30325	1.346	1.4041	1.81199	1.32328	1.85267	2.11244	2.38028	76	64	178	306	218	400	570	745	0.03619	0.019394	0.032963	0.039231	0.031594	0.038095	0.05	0.057752	0.691598	0.840462	0.611844	1.16248	0.857163	1.03163	0.831145	0.709331	7.22154	7.41818	6.96895	10.9028	10.9698	11.7438
Iso #4	D14.1	8	620	0.232083	0.640123	0.459143	0.74775	0.818194	0.904928	1.26993	1.27567	1.13629	1.57308	1.3095	1.28644	1.39684	1.8017	1.83573	1.88065	2	157	85	133	169	385	579	650	0.003333	0.037381	0.031481	0.020152	0.024493	0.036667	0.060313	0.058559	0.68568	0.762598	2.29702	1.39306	0.850853	0.990853	0.907455	0.779517	4.5	7.77395	9.45037	9.32225	8.89959	10.649
[truncated: 34 more columns]
