# Supplementary material for: Dyshomeostatic modulation of Ca2+-activated K+ channels in a human neuronal model of KCNQ2 encephalopathy
Source: eLife. 2021 Feb 5;10:e64434. doi: 10.7554/eLife.64434 (PMC7864629; doi:10.7554/eLife.64434)
Supplement: Figure 3—source data 1. [file elife-64434-fig3-data1.xlsx]

## Sheet: Fig 3 cclamp_source d
Neuron	Date	genotype	week in differentiation	day in differentiation	differentiation cohort	Bridge	RMP	Input resistance at RMP2	Vh baseline	sp Amp	sp Threshold	HW	fAHP	mAHP	sAHP
082619.11	2019-08-26	Q2-04	week 3	15	G11.1		-37.5697	1147.44
082619.12	2019-08-26	Q2-04	week 3	15	G11.1	14.5	-37.4001	1045.49	-66.4705	85.8339	-26.2604	7.51	-47.226	-12.7056	-7.37337
082619.13	2019-08-26	Q2-04	week 3	15	G11.1		-37.3537	798.206	-65.9629	92.8794	-27.5879	5.04667	-51.2695	-2.65477	-0.407563
082619.14	2019-08-26	Q2-04	week 3	15	G11.1	14.9	-47.0604	464.028
082619.15	2019-08-26	Q2-04	week 3	15	G11.1	15	-37.1348	500.238
082619.16	2019-08-26	Q2-04	week 3	15	G11.1	14.7	-40.058	1094	-66.3843	82.2433	-22.0235	6.27333	-49.5097	-6.06466	-2.51629
082619.17	2019-08-26	Q2-04	week 3	15	G11.1	18.4	-41.0553	1121.17
082619.18	2019-08-26	Q2-04	week 3	15	G11.1	19.3	-38.351	771.547
082719.1	2019-08-27	Q2-04	week 3	16	G11.1	19.1	-51.4313	596.232						-4.40857	-0.109225
082719.10	2019-08-27	Q2-04	week 3	16	G11.1	16.4	-53.9242	981.426
082719.2	2019-08-27	Q2-04	week 3	16	G11.1	19.8	-44.072	1142.27	-64.6479	99.4685	-30.3154	1.41	-50.2472	-2.80312	-1.61168
082719.4	2019-08-27	Q2-04	week 3	16	G11.1	17.6	-40.8207	1513.79	-65.539	88.3865	-30.3548	2.97333	-39.0218	-5.19847	-3.59211
082719.5	2019-08-27	Q2-04	week 3	16	G11.1	11.2	-46.3433	1310.7						-3.88954	-2.25731
082719.6	2019-08-27	Q2-04	week 3	16	G11.1	13.3	-51.2091	659.419
082719.7	2019-08-27	Q2-04	week 3	16	G11.1	12.5	-44.1055	640.101						-5.5805	-1.63514
082719.8	2019-08-27	Q2-04	week 3	16	G11.1	17.1	-40.6711	1381.11						-6.68521	-6.45402
082719.9	2019-08-27	Q2-04	week 3	16	G11.1	12.2	-37.2931	1702.23	-67.2612	96.7369	-30.1252	4.68	-44.778
092519.1	2019-09-25	Q2-04	week 3	14	G13.1b	11.8	-41.1427	1558.41	-65.7009					-5.24187	0
092519.10	2019-09-25	Q2-04	week 3	14	G13.1b	15	-38.981	1136.85	-66.1098	83.4438	-24.7192	4.43333	-45.4508	-2.93201	0
092519.2	2019-09-25	Q2-04	week 3	14	G13.1b	12.8	-37.5167	260.891	-65.9209	80.1116	-38.4827	2.08	-49.2554	-4.69258	0
092519.3	2019-09-25	Q2-04	week 3	14	G13.1b	11.8	-47.8847	354.017						-5.21303	-2.76681
092519.4	2019-09-25	Q2-04	week 3	14	G13.1b	17.3	-49.6076	1039.61	-66.7154	85.7889	-22.583	4.39	-42.8925	-4.07705	-1.77748
092519.5	2019-09-25	Q2-04	week 3	14	G13.1b	18.1	-39.32	980.921						-8.19834	-6.20613
092519.51	2019-09-25	Q2-04	week 3	14	G13.1b		-38.1994	1267.64	-66.5754	89.2957	-21.6217	6.89	-43.8538	-4.02166	-0.320691
092519.6	2019-09-25	Q2-04	week 3	14	G13.1b	16.4	-43.2312	1129.73	-63.1704	80.0161	-21.6675	4.34	-56.5186
092519.7	2019-09-25	Q2-04	week 3	14	G13.1b	13.2	-40.7162	1391.14	-67.6135	83.2843	-22.2015	5.67	-45.8221	-2.72351	-0.954174
092519.8	2019-09-25	Q2-04	week 3	14	G13.1b	15.8	-40.2417	906.43	-67.2336	89.0079	-24.7345	3.105	-46.7072	-1.99982	0
092519.9	2019-09-25	Q2-04	week 3	14	G13.1b	15	-39.9072	1377.03
092619.1	2019-09-26	Q2-04	week 3	15	G13.1b	12.4	-37.48	1560.23	-66.6669	81.8341	-23.5596	4.49333	-40.9342	-5.22161	-1.92991
092619.10	2019-09-26	Q2-04	week 3	15	G13.1b	12.1	-43.4045	1297.85	-66.0581	82.9038	-23.4375	4.74	-48.6145	-7.01824	-5.96825
092619.11	2019-09-26	Q2-04	week 3	15	G13.1b	15.8	-45.9176	1986.91	-66.9119	90.3646	-23.5214	3.405	-42.511	-2.49743	0
092619.12	2019-09-26	Q2-04	week 3	15	G13.1b	14.1	-40.5638	1619.52	-68.47					-3.18607	-0.705233
092619.2	2019-09-26	Q2-04	week 3	15	G13.1b	17.4	-42.81	1319.28	-66.7096	86.3629	-20.3552	5.85	-43.5486	-4.96884	-4.46933
092619.3	2019-09-26	Q2-04	week 3	15	G13.1b		-44.0018	996.882	-65.3049	88.2617	-22.6517	2.77	-42.8391
092619.4	2019-09-26	Q2-04	week 3	15	G13.1b		-44.7825	1194.18
092619.5	2019-09-26	Q2-04	week 3	15	G13.1b		-46.4034	274.613
092619.8	2019-09-26	Q2-04	week 3	15	G13.1b	13.7	-38.9205	856.59
092619.9	2019-09-26	Q2-04	week 3	15	G13.1b	12.6	-43.5981	1068.91	-64.9032	82.5831	-25.6246	3.03333	-47.5973
092719.13	2019-09-27	Q2-04	week 3	16	G13.1b	17.8	-47.5182	874.929	-66.8601	94.094	-27.8809	2.744	-45.3125	-6.55895	-1.92721
092719.14	2019-09-27	Q2-04	week 3	16	G13.1b	17.9	-37.7279	652.243	-67.542	100.684	-28.3585	2.03	-45.5017	-5.03072	-2.25531
092719.15	2019-09-27	Q2-04	week 3	16	G13.1b	12.8	-37.3496	550.917						-7.14051	-6.64554
092719.16	2019-09-27	Q2-04	week 3	16	G13.1b	17.8	-51.0133	1483.29						-5.38458	-4.24
092719.17	2019-09-27	Q2-04	week 3	16	G13.1b	16.5	-42.1516	1702.6						-12.0753	-8.3407
092719.18	2019-09-27	Q2-04	week 3	16	G13.1b	15.6	-39.0741	1454.39	-65.7798					-3.83792	-3.4939
092719.19	2019-09-27	Q2-04	week 3	16	G13.1b	15	-43.3399	1029.51	-67.8915	87.6211	-22.5983	4.38	-46.7529	-3.49103	-0.409061
092719.20	2019-09-27	Q2-04	week 3	16	G13.1b	12.4	-40.963	1289.1	-66.5431	86.2116	-23.407	4.29	-47.3938	-5.79409	-1.90091
093019.1	2019-09-30	Q2-04	week 3	14	G11.1b	14	-61.2748	394.003	-67.2014	82.623	-20.9757	5.92667	-40.0696	-2.35901	-1.08134
093019.10	2019-09-30	Q2-04	week 3	14	G11.1b	17.8	-40.7386	1675.4						-15.1648	-2.46592
093019.11	2019-09-30	Q2-04	week 3	14	G11.1b	8.7	-38.875	594.585						-8.24621	-1.6128
093019.12	2019-09-30	Q2-04	week 3	14	G11.1b	13	-53.4897	752.212						-3.34219	-2.31665
093019.3	2019-09-30	Q2-04	week 3	14	G11.1b	14.4	-40.0389	1436.21	-70.1341	81.9596	-20.7062	8.97	-44.2505	-15.8861	-14.4466
093019.4	2019-09-30	Q2-04	week 3	14	G11.1b	13.3	-41.9445	1485.77						-2.34873	-1.67531
093019.5	2019-09-30	Q2-04	week 3	14	G11.1b	19.1	-39.384	1515.31	-65.7001	85.7349	-21.6217	5.38	-44.4489	-2.55494	-2.4047
093019.6	2019-09-30	Q2-04	week 3	14	G11.1b	10.5	-41.0917	885.206	-68.2478	95.0727	-27.3132	2.67333	-51.3	-6.46031	-5.63087
093019.7	2019-09-30	Q2-04	week 3	14	G11.1b	14.9	-50.67	948.294						-6.23644	-3.17636
093019.8	2019-09-30	Q2-04	week 3	14	G11.1b	18.7	-40.2675	1462.51	-67.8747	85.2697	-26.062	6.54	-44.5862	-14.1021	-9.05651
093019.9	2019-09-30	Q2-04	week 3	14	G11.1b	16.2	-50.1394	855.621						-12.6249	-8.04823
100119.3	2019-10-01	Q2-04	week 3	15	G11.1b	19.8	-43.3995	686.238
100119.4	2019-10-01	Q2-04	week 3	15	G11.1b	16.9	-46.1931	1445.21						-9.60788	-7.15308
100119.5	2019-10-01	Q2-04	week 3	15	G11.1b	13.7	-48.2733	917.76						-5.68374	-4.84698
100119.6	2019-10-01	Q2-04	week 3	15	G11.1b		-51.9856	616.052	-66.1832	86.9504	-27.9846	4.79	-49.7131	-5.0993	-3.30077
100119.7	2019-10-01	Q2-04	week 3	15	G11.1b	13.8	-46.5616	1224.25						-6.07084	-4.34706
100219.1	2019-10-02	Q2-04	week 3	16	G11.1b	14.7	-44.0195	918.507	-64.4283	84.7835	-26.2756	7.1	-49.7437	-2.66527	-2.10898
100219.3	2019-10-02	Q2-04	week 3	16	G11.1b	15.9	-44.7709	1083.25						-8.17833	-7.85446
100219.4	2019-10-02	Q2-04	week 3	16	G11.1b	14.4	-42.1316	1754.97	-66.4079	97.6623	-23.4288	3.27143	-54.9665	-5.79196	-4.33284
100219.6	2019-10-02	Q2-04	week 3	16	G11.1b	14	-47.9864	689.061						-3.79729	-2.7479
100219.7	2019-10-02	Q2-04	week 3	16	G11.1b		-40.5605	931.234						-6.54912	-5.04143
102119.2	2019-10-21	Q2-04	week 3	15	G14.1	13.2	-38.172	980.341
102119.3	2019-10-21	Q2-04	week 3	15	G14.1	13.4	-47.8136	750.943	-67.7248	90.9385	-31.9112	2.84	-47.6888	-6.55524	-4.83177
102119.4	2019-10-21	Q2-04	week 3	15	G14.1	12.9	-38.6951	1240.83	-66.6949	82.7472	-24.0784	7.29	-44.8456	-4.73889	-3.70418
102119.5	2019-10-21	Q2-04	week 3	15	G14.1	13.4	-37.223	1698.86						-4.21846	-0.462939
102119.51	2019-10-21	Q2-04	week 3	15	G14.1		-52.6739	1324.61						-5.48245	-3.74639
082619.10	2019-08-26	Iso #4	week 3	15	G11.1	15.2	-44.7708	508.558	-64.9783	82.5259	-19.9178	7.02667	-43.0603	-8.38718	-3.25507
082619.3	2019-08-26	Iso #4	week 3	15	G11.1	16.1	-49.1963	500.062	-66.0076	91.9475	-25.2584	3.50667	-52.714	-5.75264	-3.13924
082619.4	2019-08-26	Iso #4	week 3	15	G11.1	18	-53.557	523.413	-66.9975	86.9763	-28.7984	2.47333	-54.0466	-3.21246	-1.18628
082619.6	2019-08-26	Iso #4	week 3	15	G11.1	18.3	-37.1056	846.989
082619.7	2019-08-26	Iso #4	week 3	15	G11.1	15.3	-52.001	802.256	-63.6749	86.9141	-22.0032	3.36	-46.1426	-2.72142	-1.91242
082619.8	2019-08-26	Iso #4	week 3	15	G11.1	16.3	-37.2607	1549.07	-70.2218
082619.9	2019-08-26	Iso #4	week 3	15	G11.1	16	-41.4319	755.385	-69.8633	86.9989	-22.9187	8.13	-52.7802
082719.11	2019-08-27	Iso #4	week 3	16	G11.1	11.4	-40.4301	1182.46	-62.7327	91.5108	-25.6653	6.145	-41.481	-3.75769	-1.84017
082719.12	2019-08-27	Iso #4	week 3	16	G11.1	17.4	-50.1955	1363.53
082719.13	2019-08-27	Iso #4	week 3	16	G11.1	16.2	-40.3057	1838.54						-5.49618	-3.55002
082719.14	2019-08-27	Iso #4	week 3	16	G11.1	12.8	-45.5568	1249.57	-65.6121	89.5814	-30.9492	2.09143	-40.353	-4.21058	-3.49721
082719.15	2019-08-27	Iso #4	week 3	16	G11.1	13.6	-39.079	1415.8						-7.50472	-6.62896
082719.16	2019-08-27	Iso #4	week 3	16	G11.1	12.2	-41.9009	1369.05	-64.1322	83.3125	-20.8054	6.39	-43.602
082719.17	2019-08-27	Iso #4	week 3	16	G11.1	12.5	-49.514	1152.99	-67.366	80.3868	-30.6803	3.44667	-41.6362	-5.24689	-4.8596
082719.18	2019-08-27	Iso #4	week 3	16	G11.1	14.2	-44.1428	1710.4	-67.3391	86.369	-20.7476	5.35143	-45.0832	-14.6809	-8.955
082719.19	2019-08-27	Iso #4	week 3	16	G11.1	14	-40.1286	1684.58	-65.6917	83.1111	-20.6238	9.328	-40.2954	-15.4198	-11.9229
092519.11	2019-09-25	Iso #4	week 3	14	G13.1b	12.2	-37.11	990.139	-67.6262	89.6904	-26.1056	4.24571	-45.398	-0.939783	0
092519.12	2019-09-25	Iso #4	week 3	14	G13.1b	12.2	-47.3138	1041.72	-63.3479	80.0166	-22.7905	4.68	-43.1274	-5.22556	-4.54192
092519.13	2019-09-25	Iso #4	week 3	14	G13.1b	14	-45.3346	1549.81	-69.2975					-8.84532	-7.53365
092519.14	2019-09-25	Iso #4	week 3	14	G13.1b	14.7	-48.1071	1036.94	-64.8149	86.078	-26.0773	3.435	-47.2412	-5.94212	-3.76688
092519.16	2019-09-25	Iso #4	week 3	14	G13.1b	18.4	-53.9046	451.896	-66.6177	80.0759	-27.3895	3.16	-50.0793	-2.50664	-2.18033
092519.17	2019-09-25	Iso #4	week 3	14	G13.1b	15.3	-46.5638	542.127	-65.5286	85.4057	-26.3774	2.39333	-53.5177	-2.34486	-2.14768
092519.18	2019-09-25	Iso #4	week 3	14	G13.1b	12.2	-52.9255	766.736	-69.6497	87.7466	-21.5149	4.04	-45.1965	-3.67018	-2.52253
092519.19	2019-09-25	Iso #4	week 3	14	G13.1b	15	-45.1084	800.084	-62.3831					-1.77941	-1.31397
092519.20	2019-09-25	Iso #4	week 3	14	G13.1b	11.2	-46.2446	978.459	-66.8049	88.096	-25.4313	2.38	-48.4416	-5.58496	-4.72446
092619.13	2019-09-26	Iso #4	week 3	15	G13.1b	12.2	-47.9146	759.053	-66.6252	82.3723	-27.0386	2.744	-49.8779	-5.00675	-4.55305
092619.14	2019-09-26	Iso #4	week 3	15	G13.1b	19.8	-53.0032	843.569	-66.3822	91.486	-29.8523	1.752	-53.949	-5.00365	-3.09658
092619.15	2019-09-26	Iso #4	week 3	15	G13.1b		-38.1842	558.635						-6.6304	-1.85693
092619.16	2019-09-26	Iso #4	week 3	15	G13.1b	16	-44.7687	1218.31						-5.54553	-5.18594
092619.17	2019-09-26	Iso #4	week 3	15	G13.1b	14.1	-51.4263	536.784	-65.16	102.794	-31.7139	1.4	-50.2625	-3.42151	-2.17676
092619.18	2019-09-26	Iso #4	week 3	15	G13.1b	10.8	-54.5712	807.432	-68.1669	96.291	-26.8642	2.33714	-45.5889	-1.64903	0
092619.19	2019-09-26	Iso #4	week 3	15	G13.1b	13.6	-44.4329	1032.39	-67.6882	88.5317	-25.3601	2.66	-52.9175	-4.38514	-3.70621
092619.20	2019-09-26	Iso #4	week 3	15	G13.1b	11.8	-44.7147	1135.5
092619.21	2019-09-26	Iso #4	week 3	15	G13.1b	16.1	-39.0826	605.754						-1.82186	-0.104553
092619.22	2019-09-26	Iso #4	week 3	15	G13.1b	16.7	-46.3507	500.405	-67.6656	92.4077	-30.8685	1.605	-51.5137	-5.9097	-2.20209
092619.23	2019-09-26	Iso #4	week 3	15	G13.1b	15.3	-37.2571	594.309						-3.16173	-1.79584
092719.1	2019-09-27	Iso #4	week 3	16	G13.1b	15.8	-41.0505	1455.17	-66.2466	92.1804	-28.1616	3.776	-47.2473	-4.41792	-2.33566
092719.10	2019-09-27	Iso #4	week 3	16	G13.1b	14.2	-41.5401	1146.43						-2.51485	-0.380295
092719.11	2019-09-27	Iso #4	week 3	16	G13.1b		-39.0708	812.067
092719.12	2019-09-27	Iso #4	week 3	16	G13.1b	13.6	-43.8075	1537.93
092719.4	2019-09-27	Iso #4	week 3	16	G13.1b	13.3	-38.37	1326.79	-65.7094	84.905	-23.4131	4.672	-44.6106	-4.87067	-4.22198
092719.5	2019-09-27	Iso #4	week 3	16	G13.1b	11.6	-44.8725	671.179	-66.2199	92.8252	-32.1472	3.392	-46.8506	-1.31216	0
092719.6	2019-09-27	Iso #4	week 3	16	G13.1b	17	-37.2254	918.1	-65.9467	96.3422	-25.116	3.91	-55.0385	-2.06242	0
092719.7	2019-09-27	Iso #4	week 3	16	G13.1b	11.8	-40.2506	1073.46	-65.3798	84.8195	-25.8077	3.38	-41.1835	-3.87606	-2.47877
092719.71	2019-09-27	Iso #4	week 3	16	G13.1b		-47.383	656.888						-5.6786	-5.5
092719.8	2019-09-27	Iso #4	week 3	16	G13.1b	12.6	-39.6714	1501.93						-4.07903	-3.35862
092719.81	2019-09-27	Iso #4	week 3	16	G13.1b		-40.2739	1253.14						-0.580865	-0.0709442
092719.9	2019-09-27	Iso #4	week 3	16	G13.1b	16.9	-42.0176	881.038
093019.13	2019-09-30	Iso #4	week 3	14	G11.1b	15	-37.0674	1197.8
093019.14	2019-09-30	Iso #4	week 3	14	G11.1b	15	-57.2274	378.929	-66.8341	86.3196	-23.2391	3.43	-54.8248	-3.10236	-0.296619
093019.16	2019-09-30	Iso #4	week 3	14	G11.1b	10.6	-54.277	596.853	-67.3492	93.3807	-23.1934	3.39	-46.0815	-6.26038	-4.17805
093019.17	2019-09-30	Iso #4	week 3	14	G11.1b		-43.065	469.135
093019.18	2019-09-30	Iso #4	week 3	14	G11.1b	16	-43.7689	831.008						-3.55831	-3.01839
093019.20	2019-09-30	Iso #4	week 3	14	G11.1b	19	-47.1106	678.376	-65.6749	91.2588	-22.1303	2.67	-47.5922	-13.6318	-1.76591
093019.21	2019-09-30	Iso #4	week 3	14	G11.1b	18.8	-41.5454	893.478	-65.7384	85.7007	-28.1754	3.16	-53.3676	-5.14609	-3.15895
093019.22	2019-09-30	Iso #4	week 3	14	G11.1b	15.4	-51.9584	342.033
100119.10	2019-10-01	Iso #4	week 3	15	G11.1b	10.9	-50.6279	406.125	-64.9093	86.531	-22.0083	3.41667	-50.4659	-4.59688	-2.43224
100119.11	2019-10-01	Iso #4	week 3	15	G11.1b	9.5	-57.8825	637.834	-64.8913	85.9408	-20.9732	4.15	-50.3769	-14.0724	-5.01278
100119.12	2019-10-01	Iso #4	week 3	15	G11.1b	16.3	-58.8112	453.558						-7.81465	-1.90696
100119.13	2019-10-01	Iso #4	week 3	15	G11.1b	15.1	-51.4272	527.324	-64.6939	86.1478	-24.498	3.32	-47.081	-10.7564	-3.10479
100119.14	2019-10-01	Iso #4	week 3	15	G11.1b	14.4	-52.6596	566.069	-66.9524	91.8395	-23.4833	2.81	-54.7943	-2.64988	-1.61163
100119.15	2019-10-01	Iso #4	week 3	15	G11.1b	16.2	-47.9437	782.913	-67.0401	90.9136	-24.3661	3.94571	-45.9944	-3.45245	-2.78625
100119.16	2019-10-01	Iso #4	week 3	15	G11.1b	13.7	-40.7045	1520.29	-62.1279	85.5044	-25.238	4.5	-54.4739
100119.17	2019-10-01	Iso #4	week 3	15	G11.1b		-39.2765	831.523						-6.82412	-6.65963
100119.8	2019-10-01	Iso #4	week 3	15	G11.1b	13.8	-38.6704	1149.03	-64.8185	88.801	-26.6593	2.12	-45.1486	-4.98036	-2.0906
100119.9	2019-10-01	Iso #4	week 3	15	G11.1b	16	-45.9685	213.139
100219.10	2019-10-02	Iso #4	week 3	16	G11.1b	14.8	-50.486	990.072	-66.1143	89.796	-19.8822	3.9	-48.8892	-6.87385	-3.35081
100219.11	2019-10-02	Iso #4	week 3	16	G11.1b	13.3	-53.8998	614.622	-64.6819	89.5721	-23.8342	3.564	-47.0093	-4.3892	-1.42227
100219.12	2019-10-02	Iso #4	week 3	16	G11.1b	13.7	-46.2181	661.065	-66.8256	92.6816	-21.0724	4.41	-50.4379	-5.77758	-1.84855
100219.13	2019-10-02	Iso #4	week 3	16	G11.1b	12.5	-39.4669	332.578	-68.1148	86.5703	-30.632	2.79	-52.0401	-6.71633	-2.08971
100219.14	2019-10-02	Iso #4	week 3	16	G11.1b	8.5	-49.8524	530.89	-66.3139	85.1814	-28.0991	3	-52.4826	-12.0664	-4.32512
100219.16	2019-10-02	Iso #4	week 3	16	G11.1b	17.3	-58.0608	416.315	-66.428	85.2625	-21.815	4.29667	-46.0612	-3.32996	-2.4215
100219.18	2019-10-02	Iso #4	week 3	16	G11.1b	17.8	-45.099	360.155	-67.5296	82.0734	-22.9492	5.40286	-44.5818
100219.9	2019-10-02	Iso #4	week 3	16	G11.1b	14	-40.2982	1825.22						-2.26597	-1.55194
062719.10	2019-06-27	Q2-04	week 4	25	G11.1	16	-42.0232	752.287	-65.6423	93.2099	-38.7065	2.11667	-53.2633	-6.90502	-4.26879
062719.11	2019-06-27	Q2-04	week 4	25	G11.1	20.4	-50.587	846.709	-67.6225	89.29	-32.8491	1.928	-52.3193	-3.09017	-1.61454
062719.12	2019-06-27	Q2-04	week 4	25	G11.1	12.8	-43.4569	1148.21	-65.68	98.5169	-29.3213	2.612	-48.3643	-6.17005	-4.46624
062719.13	2019-06-27	Q2-04	week 4	25	G11.1	12.5	-39.2176	501.314
062719.14	2019-06-27	Q2-04	week 4	25	G11.1	15.2	-38.2299	829.433	-64.5678
062719.15	2019-06-27	Q2-04	week 4	25	G11.1	12.4	-38.2694	785.7	-67.6782	100.53	-30.4565	3.73	-42.9993
062719.9	2019-06-27	Q2-04	week 4	25	G11.1	18.1	-44.16	626.771
071219.5	2019-07-12	Q2-04	week 4	23	G1.1	17.8	-53.5353	712.001	-66.2278	91.1148	-29.2358	3.09	-46.8445	-4.2756	-1.14272
071219.6	2019-07-12	Q2-04	week 4	23	G1.1	19.2	-45.1175	1022.26	-66.3383	91.3444	-31.5186	2.82	-51.825	-3.25426	-1.65243
071219.7	2019-07-12	Q2-04	week 4	23	G1.1	19.6	-49.3366	423.186	-65.6872	107.161	-29.0833	2.17	-55.0232	-5.82991	-2.55765
071219.8	2019-07-12	Q2-04	week 4	23	G1.1	15	-51.9212	222.623	-63.1968	95.7489	-39.9475	1.5	-52.1444	-3.36606	-2.18403
072319.11	2019-07-23	Q2-04	week 4	23	G12.1a	10.7	-50.9505	655.096	-65.1814	92.3879	-30.1158	1.96	-48.4695	-6.69456	0
072319.12	2019-07-23	Q2-04	week 4	23	G12.1a	9.8	-45.2791	813.588	-64.0801	86.8309	-27.3056	2.59	-47.89	-3.89787	-1.23953
072319.13	2019-07-23	Q2-04	week 4	23	G12.1a	11.1	-41.2962	1277.2	-68.0334	103.844	-28.4729	1.32571	-46.1382	-2.67166	-2.24873
072319.14	2019-07-23	Q2-04	week 4	23	G12.1a	11	-49.1686	1003.66	-67.1098	94.5095	-25.86	2.51667	-52.6784	-7.67092	-2.54014
072319.9	2019-07-23	Q2-04	week 4	23	G12.1a	15.3	-43.0108	691.053	-64.4789	81.1354	-30.7739	2.784	-44.67	-5.1685	-1.33796
080619.1	2019-08-06	Q2-04	week 4	24	G12.1b	20.7	-40.9117	368.418
080619.11	2019-08-06	Q2-04	week 4	24	G12.1b	19.4	-44.892	563.278	-67.1099	85.5654	-30.2963	2.85	-57.8918	-7.6487	-1.84742
080619.12	2019-08-06	Q2-04	week 4	24	G12.1b	15.8	-39.9975	974.164	-66.7901	84.0936	-26.6724	3.76	-44.92	-7.30887	-0.0658307
080619.2	2019-08-06	Q2-04	week 4	24	G12.1b	18.4	-58.7653	272.125	-63.3284	91.7097	-48.523	1.76	-59.3262	-5.37723	-1.35255
080619.3	2019-08-06	Q2-04	week 4	24	G12.1b	19.8	-63.3067	305.501	-65.3575	90.8092	-24.9634	2.72	-59.7534	-10.5109	-0.984782
080619.4	2019-08-06	Q2-04	week 4	24	G12.1b	20.9	-59.5637	814.601	-67.3737	96.1416	-29.5105	3.64667	-53.8432	-11.0339	-6.56846
080619.5	2019-08-06	Q2-04	week 4	24	G12.1b	14	-59.5604	836.347	-67.5697	103.751	-30.3162	2.156	-49.3225
080619.6	2019-08-06	Q2-04	week 4	24	G12.1b	15.9	-56.3493	875.934						-3.85191	-3.09393
080619.7	2019-08-06	Q2-04	week 4	24	G12.1b	14.2	-62.35	559.824	-66.6689	92.029	-29.3579	2.25	-55.6946	-8.3236	-1.11453
080619.8	2019-08-06	Q2-04	week 4	24	G12.1b	15	-37.4615	635.278
080619.9	2019-08-06	Q2-04	week 4	24	G12.1b	18.4	-40.381	892.556	-67.6459	89.2523	-24.6	3.26	-58.9905	-9.63094	-9.07037
080719.1	2019-08-07	Q2-04	week 4	25	G12.1b		-45.2591	1203.04
080719.10	2019-08-07	Q2-04	week 4	25	G12.1b	18.2	-53.2356	720.277	-65.7235	95.4598	-29.6143	2.032	-51.3977	-2.91707	-1.77592
080719.2	2019-08-07	Q2-04	week 4	25	G12.1b	18.4	-58.44	269.721	-64.2066	93.5035	-33.844	2.29333	-65.2568	-6.71471	-2.89161
080719.3	2019-08-07	Q2-04	week 4	25	G12.1b	15.8	-49.4698	1153.29						-5.98174	-2.54707
080719.4	2019-08-07	Q2-04	week 4	25	G12.1b	20.8	-49.9574	1051.99
080719.5	2019-08-07	Q2-04	week 4	25	G12.1b	16	-40.634	1414.7	-67.4798	92.6747	-29.8538	3.25	-51.6418	-4.84255	-3.27273
080719.6	2019-08-07	Q2-04	week 4	25	G12.1b	20.1	-59.7867	672.759	-66.635	88.5771	-51.4183	2.005	-55.2107	-9.54208	-2.79762
080719.7	2019-08-07	Q2-04	week 4	25	G12.1b	13.2	-44.1612	1250.81						-5.59619	-1.05168
080719.8	2019-08-07	Q2-04	week 4	25	G12.1b	13.2	-45.119	949.85						-7.56467	-6.96415
080719.9	2019-08-07	Q2-04	week 4	25	G12.1b		-58.2461	952.787
080819.11	2019-08-08	Q2-04	week 4	26	G12.1b	14.2	-39.8539	678.621	-65.2133	94.3332	-31.044	1.956	-53.3936	-4.63951	-0.893142
080819.12	2019-08-08	Q2-04	week 4	26	G12.1b	11.6	-50.3225	823.16	-65.9803	100.236	-26.7029	2.71	-50.5829	-1.71979	-1.07792
080819.13	2019-08-08	Q2-04	week 4	26	G12.1b	13.7	-39.5686	1191.26	-65.3441	88.6856	-29.6631	2.79714	-48.257	-5.23461	-1.5499
080819.14	2019-08-08	Q2-04	week 4	26	G12.1b	19.6	-47.0096	995.733
080819.15	2019-08-08	Q2-04	week 4	26	G12.1b	13.9	-43.5381	1570.95	-63.0642	89.1873	-25.8789	2.78	-49.6979	-10.0144	-9.38495
080819.16	2019-08-08	Q2-04	week 4	26	G12.1b	16.7	-49.4413	1236.73	-65.6934	93.5341	-35.396	2.12	-51.0428	-5.64558	-5.18223
080819.17	2019-08-08	Q2-04	week 4	26	G12.1b		-41.3244	1777.85						-5.58399	-1.30973
080819.18	2019-08-08	Q2-04	week 4	26	G12.1b	12.3	-49.5554	1199.69	-64.1879	86.9642	-28.0457	2.88667	-51.6154
080819.19	2019-08-08	Q2-04	week 4	26	G12.1b	12.8	-57.1927	454.007	-63.1356	98.5869	-36.0311	1.35333	-53.9754	-10.5792	-1.45733
080819.20	2019-08-08	Q2-04	week 4	26	G12.1b	12.5	-41.9837	1403.05	-66.4953	91.9104	-30.8105	3.188	-46.8567	-2.05684	-1.6808
080819.21	2019-08-08	Q2-04	week 4	26	G12.1b	18.4	-53.5861	548.486	-66.3953	87.2388	-23.5596	2.98571	-50.0096	-11.3406	-3.43056
082019.1	2019-08-20	Q2-04	week 4	23	G13.1	16.2	-53.184	1197.77						-4.5276	-4.39593
082019.10	2019-08-20	Q2-04	week 4	23	G13.1	14.8	-38.8156	1028.34	-65.542	100.363	-31.8705	3.49333	-54.3315	-10.0993	-2.61728
082019.2	2019-08-20	Q2-04	week 4	23	G13.1	14.2	-44.8645	1194.99
082019.3	2019-08-20	Q2-04	week 4	23	G13.1		-38.6163	1247.18	-65.7966	94.6611	-30.0649	3.32667	-53.4465	-6.5592	-5.94165
082019.4	2019-08-20	Q2-04	week 4	23	G13.1	16.8	-42.5898	910.827	-66.2871	96.4588	-28.8595	2.54667	-51.6256	-5.14254	-3.10735
082019.5	2019-08-20	Q2-04	week 4	23	G13.1		-40.511	1151.15
082019.6	2019-08-20	Q2-04	week 4	23	G13.1	19.4	-37.7472	1116.13						-3.19512	-3.72409
082019.7	2019-08-20	Q2-04	week 4	23	G13.1	12.3	-42.3919	980.334	-67.3371	101.593	-31.9443	3.825	-51.3153	-3.36622	-2.73001
082019.8	2019-08-20	Q2-04	week 4	23	G13.1	13.3	-59.3255	968.086	-67.5012	88.4286	-28.4653	3.09	-45.0806	-4.27751	-4.07159
082019.9	2019-08-20	Q2-04	week 4	23	G13.1	16.3	-54.6787	1352.98	-64.4112	90.059	-36.0238	3.07143	-53.0047	-3.64875	-1.51127
082119.1	2019-08-21	Q2-04	week 4	24	G13.1	15.6	-47.4047	1251.59	-67.3131	95.3028	-29.8411	2.14	-51.8545	-9.74796	-7.13967
082119.10	2019-08-21	Q2-04	week 4	24	G13.1	15.3	-50.7577	920.506	-64.5328	101.966	-32.8796	1.432	-54.3701	-8.82167	-5.32381
082119.2	2019-08-21	Q2-04	week 4	24	G13.1	12.3	-52.63	947.305	-66.9288	101.859	-33.5999	1.736	-52.8015	-5.8796	-3.39256
082119.4	2019-08-21	Q2-04	week 4	24	G13.1	14.8	-37.9343	1255.26
082119.6	2019-08-21	Q2-04	week 4	24	G13.1	14.1	-45.1503	1207.56	-67.7613	93.6504	-27.0182	2.68	-51.0661	-6.14803	-4.36748
082119.7	2019-08-21	Q2-04	week 4	24	G13.1	16.4	-43.887	1026.11	-68.3947	94.2329	-33.4066	3.28667	-54.0059	-8.82249	-7.1426
082119.8	2019-08-21	Q2-04	week 4	24	G13.1	15.8	-44.5042	1242.04	-68.1611	91.4826	-23.4802	5.52	-48.7183	-3.61445	-1.4001
082119.9	2019-08-21	Q2-04	week 4	24	G13.1	16.7	-45.6466	1016.65	-67.1221	85.1504	-32.9514	3.13	-50.7202	-6.62216	-2.28831
082219.11	2019-08-22	Q2-04	week 4	25	G13.1	16.4	-41.0333	820.767						-4.65878	-1.24418
082219.12	2019-08-22	Q2-04	week 4	25	G13.1	15.3	-50.1594	617.947	-65.2295	89.6944	-29.5308	1.90667	-54.0975	-3.93952	-1.48561
082219.13	2019-08-22	Q2-04	week 4	25	G13.1	14.1	-41.5082	747.177	-67.6334	87.8666	-30.5684	2.62	-46.5698	-6.09634	-5.11383
082219.14	2019-08-22	Q2-04	week 4	25	G13.1	19	-53.403	406.789
082219.15	2019-08-22	Q2-04	week 4	25	G13.1	17.1	-50.3877	771.465	-67.4924	93.8962	-34.5581	2.52	-51.8921
082219.16	2019-08-22	Q2-04	week 4	25	G13.1	17.2	-42.2324	1228.3	-66.3627	90.1664	-31.1454	2.20286	-52.3943	-4.82113	-3.91763
082219.17	2019-08-22	Q2-04	week 4	25	G13.1	16.4	-45.133	919.426	-66.3627	89.9121	-33.2438	2.54	-52.1342	-8.40182	-4.19351
082219.18	2019-08-22	Q2-04	week 4	25	G13.1	13	-46.5217	867.747	-66.869	97.0051	-34.1746	2.05	-57.9834	-6.50047	-5.10715
082219.19	2019-08-22	Q2-04	week 4	25	G13.1	19	-49.864	1030.75	-67.072	92.9509	-34.3323	2.09333	-55.4962	-4.97575	-3.73811
082319.7	2019-08-23	Q2-04	week 4	26	G13.1	16.1	-50.3262	646.081	-62.4562	80.071	-32.0374	0.848	-54.9988
082319.8	2019-08-23	Q2-04	week 4	26	G13.1	12	-38.7016	703.305	-64.892	83.4772	-27.2217	1.35333	-46.2646	-1.84965	-1.10293
082319.9	2019-08-23	Q2-04	week 4	26	G13.1	13.1	-39.9819	504.285
100719.10	2019-10-07	Q2-04	week 4	26	G13.1	14.8	-38.3633	973.632						-12.2591	-3.36943
100719.11	2019-10-07	Q2-04	week 4	26	G13.1	12.8	-37.494	564.558	-65.6899	93.171	-30.6956	2.07667	-53.2735	-5.86761	-3.00192
100719.12	2019-10-07	Q2-04	week 4	26	G13.1	11.8	-37.6999	410.742	-61.9101	87.6262	-26.8606	2.26333	-47.6329	-5.1248	-0.0157681
100719.13	2019-10-07	Q2-04	week 4	26	G13.1	9.8	-49.8785	775.248	-66.8417	95.3878	-27.4048	2.544	-53.6133	-3.753	-2.32103
100719.14	2019-10-07	Q2-04	week 4	26	G13.1	12.3	-53.7951	532.264	-66.5812	95.5017	-28.7984	2.29333	-47.0479	-3.57198	-2.46167
100719.15	2019-10-07	Q2-04	week 4	26	G13.1	9.2	-59.1264	771.802	-65.7571	94.8251	-26.2909	2.59	-51.3306
100719.17	2019-10-07	Q2-04	week 4	26	G13.1	7.9	-37.4169	267.759						-3.47024	-2.81766
100719.18	2019-10-07	Q2-04	week 4	26	G13.1	11.2	-51.3644	882.464
100719.19	2019-10-07	Q2-04	week 4	26	G13.1	12.2	-43.8939	1157.38	-66.6265	88.9654	-28.3432	3.265	-42.6025	-6.62399	-3.50877
100719.20	2019-10-07	Q2-04	week 4	26	G13.1	10.6	-44.0151	910.263						-4.43285	-2.69924
100719.9	2019-10-07	Q2-04	week 4	26	G13.1	19	-58.2678	636.919	-63.5638	87.7133	-31.3619	2.72	-47.3735	-8.18507	-2.97656
100819.10	2019-10-08	Q2-04	week 4	22	G11.1	11.2	-46.004	763.928	-66.0089	91.4147	-23.0408	3.36	-46.402	-7.10418	-1.67769
100819.11	2019-10-08	Q2-04	week 4	22	G11.1	13.9	-60.5089	559.776
100819.12	2019-10-08	Q2-04	week 4	22	G11.1	11.1	-47.8727	1164.18	-63.5222	83.4705	-23.0611	3.84	-43.7012
100819.13	2019-10-08	Q2-04	week 4	22	G11.1	14.4	-44.0699	766.661						-3.19173	-2.46095
100819.14	2019-10-08	Q2-04	week 4	22	G11.1	15	-41.4434	1979.17						-4.60867	-2.66259
100819.9	2019-10-08	Q2-04	week 4	22	G11.1	12.1	-43.5912	602.473
101019.10	2019-10-10	Q2-04	week 4	24	G11.1	12.1	-45.1503	877.26	-66.6095	92.9461	-28.3432	2.92	-48.1567	-7.53998	-4.06149
101019.11	2019-10-10	Q2-04	week 4	24	G11.1	12.2	-51.4528	590.252
101019.12	2019-10-10	Q2-04	week 4	24	G11.1	12.2	-43.0913	881.111						-10.0462	-4.3378
111119.1	2019-11-11	Q2-04	week 4	22	G16.1	13.1	-53.1051	673.965	-68.0766	98.3907	-26.886	2.76667	-49.374
111119.2	2019-11-11	Q2-04	week 4	22	G16.1	9.3	-54.9496	834.31
111119.4	2019-11-11	Q2-04	week 4	22	G16.1	10.4	-41.5903	720.547						-3.42236	-2.31866
111119.5	2019-11-11	Q2-04	week 4	22	G16.1	17.2	-52.292	847.645
111219.1	2019-11-12	Q2-04	week 4	23	G16.1	12.3	-42.8144	1075.67	-65.3203	89.7852	-24.9227	3.11333	-49.3164
111219.10	2019-11-12	Q2-04	week 4	23	G16.1	10.6	-50.5087	513.365	-65.8293	99.2054	-27.3234	1.42667	-56.2363	-3.73511	-3.41333
111219.2	2019-11-12	Q2-04	week 4	23	G16.1	11.9	-44.2245	605.614	-68.3585	88.1645	-48.5636	2.64667	-52.1545
111219.3	2019-11-12	Q2-04	week 4	23	G16.1	14.4	-49.6537	696.964	-66.6129	101.7	-25.9094	3.3	-51.178	-7.83252	-6.24464
111219.6	2019-11-12	Q2-04	week 4	23	G16.1	15.9	-52.8173	1056.64	-67.3667	91.651	-27.9312	3.42	-52.5894	-8.5274	-5.65084
111219.8	2019-11-12	Q2-04	week 4	23	G16.1	14	-52.8624	823.899
111219.9	2019-11-12	Q2-04	week 4	23	G16.1	11.4	-51.5297	888.343
111319.10	2019-11-13	Q2-04	week 4	24	G16.1	12.2	-43.4706	1015.36	-64.9775	103.529	-30.5786	2.235	-51.8875
111319.11	2019-11-13	Q2-04	week 4	24	G16.1	11.1	-52.9217	667.952	-66.4634	102.753	-31.9939	1.4325	-62.233
111319.12	2019-11-13	Q2-04	week 4	24	G16.1	12.4	-47.1098	1072.97
111319.13	2019-11-13	Q2-04	week 4	24	G16.1	12.8	-63.8277	356.019
111319.3	2019-11-13	Q2-04	week 4	24	G16.1	15.1	-39.3666	865.334
111319.4	2019-11-13	Q2-04	week 4	24	G16.1	16	-50.6194	557.667	-63.7985	98.2834	-27.1606	2.2	-53.9734	-2.87195	-1.15036
111319.5	2019-11-13	Q2-04	week 4	24	G16.1	12.8	-37.9854	673.9
111319.6	2019-11-13	Q2-04	week 4	24	G16.1	16	-57.491	587.736	-64.0159	87.5653	-23.8444	2.83333	-47.3124	-8.80079	-5.1031
111519.1	2019-11-15	Q2-04	week 4	26	G16.1	17	-57.1524	770.148	-65.1815	101.238	-30.6091	1.52	-62.4288	-4.01071	-1.71751
111519.3	2019-11-15	Q2-04	week 4	26	G16.1	13.4	-46.6076	1041.56	-67.7891	98.7568	-25.8636	3.525	-46.608
060520.1	2020-06-05	Q2-04	week 4	23	G16.1	10.1	-46.9867	722.557						-5.60376	0
060520.2	2020-06-05	Q2-04	week 4	23	G16.1	9.3	-58.3378	595.951	-62.5947	90.5641	-29.3808	1.665	-50.293
060520.3	2020-06-05	Q2-04	week 4	23	G16.1	9.7	-50.0811	651.192
060520.4	2020-06-05	Q2-04	week 4	23	G16.1	9.6	-40.9736	874.115	-67.289	98.7831	-26.6317	1.59333	-56.9051	-6.36229	-3.62171
060520.5	2020-06-05	Q2-04	week 4	23	G16.1	10.4	-44.6602	718.885	-66.5797	89.0363	-32.7018	1.22857	-60.5512	-3.05535	-1.856
060520.6	2020-06-05	Q2-04	week 4	23	G16.1	11.1	-52.0331	1110.01	-68.4394	82.9841	-27.4902	2.784	-49.4812	-7.41054	-3.88119
060820.1	2020-06-08	Q2-04	week 4	26	G16.1	11.2	-37.9664	774.65						-6.44371	0
060820.2	2020-06-08	Q2-04	week 4	26	G16.1	11.5	-54.2632	910.895						-12.3644	-2.68694
061520.1	2020-06-15	Q2-04	week 4	22	G14.1	12	-38.095	1037.91						-10.2523	-3.9051
061520.2	2020-06-15	Q2-04	week 4	22	G14.1	10.2	-37.1992	407.704						-5.76744	-1.27759
061520.3	2020-06-15	Q2-04	week 4	22	G14.1	9.9	-46.1494	490.177	-69.0662	85.7959	-31.4087	1.608	-50.6653	-4.39808	-2.30295
061620.8	2020-06-16	Q2-04	week 4	23	G14.1	10.9	-40.1654	459.51	-64.0885	86.2646	-30.8024	1.34333	-56.1676	-6.77114	-3.20173
061720.3	2020-06-17	Q2-04	week 4	24	G14.1	9.3	-40.7085	836.148	-65.7544	80.0214	-31.7434	2.51667	-48.9705	-4.11258	-2.36726
061720.4	2020-06-17	Q2-04	week 4	24	G14.1	9.4	-39.5253	863.033						-3.86322	-2.34357
061720.5	2020-06-17	Q2-04	week 4	24	G14.1	9.3	-42.688	915.151	-67.7521	80.1728	-35.2885	2.27667	-49.7538
061720.7	2020-06-17	Q2-04	week 4	24	G14.1	11.3	-50.2736	1165.56	-68.1766	95.7263	-33.3557	1.33	-55.8726	-6.51875	-5.6203
061920.2	2020-06-19	Q2-04	week 4	26	G14.1	10.7	-47.3715	728.701	-67.2095	88.4447	-35.553	1.61667	-56.2998	-4.62552	-1.0208
061920.4	2020-06-19	Q2-04	week 4	26	G14.1	15.3	-50.066	602.356	-68.1646	90.8888	-33.0544	1.4025	-53.4325	-4.59394	-2.94122
062719.1	2019-06-27	Iso #4	week 4	25	G11.1	12.1	-42.5656	364.891	-66.9609	98.689	-32.7861	1.82	-49.6114
062719.17	2019-06-27	Iso #4	week 4	25	G11.1	16.9	-37.7856	1413.98	-65.8784	82.8985	-28.6604	3.44857	-46.9404	-4.45501	-3.94597
062719.18	2019-06-27	Iso #4	week 4	25	G11.1	15.3	-41.9481	739.309	-65.4262	101.096	-33.5032	2.45333	-54.1178	-5.32945	-3.13813
062719.2	2019-06-27	Iso #4	week 4	25	G11.1	12.4	-41.23	731.066	-67.6358	98.9468	-29.6814	1.904	-58.2397	-4.74737	-2.99954
062719.3	2019-06-27	Iso #4	week 4	25	G11.1	14.7	-42.3	1583.8	-67.1957	88.6757	-31.5465	2.70857	-47.8864	-3.18005	-1.39246
062719.4	2019-06-27	Iso #4	week 4	25	G11.1	20.2	-46.2888	1236.77	-67.3346	98.7067	-29.4364	1.93143	-51.8886	-5.1405	-3.41809
062719.5	2019-06-27	Iso #4	week 4	25	G11.1	15	-38.77	452.832	-66.6506	92.737	-33.1238	1.556	-50.0671
062719.6	2019-06-27	Iso #4	week 4	25	G11.1	12.5	-47.9112	1088.7	-66.3157	86.7843	-38.9361	2.20286	-47.4679	-3.51833	-3.16849
062719.8	2019-06-27	Iso #4	week 4	25	G11.1	16.5	-43.9204	1173.22	-69.0112	93.277	-38.5045	2.75143	-49.9311	-3.8004	-3.63362
071219.1	2019-07-12	Iso #4	week 4	23	G1.1	16.2	-56.3674	553.947	-65.3427	94.5328	-31.1432	2.12	-56.7474	-3.39221	-1.16828
071219.2	2019-07-12	Iso #4	week 4	23	G1.1	14.2	-43.0985	1442.74	-67.5872	102.748	-30.8838	2.10857	-48.5404	-4.73131	-3.48977
071219.4	2019-07-12	Iso #4	week 4	23	G1.1	14.3	-54.0264	443.508	-66.1201	91.645	-31.7139	2.268	-58.4167	-8.68504	-2.68788
072319.1	2019-07-23	Iso #4	week 4	23	G12.1a	15.3	-49.6457	643.314
072319.2	2019-07-23	Iso #4	week 4	23	G12.1a	10.6	-41.4504	793.977	-68.2519	105.349	-32.5684	1.572	-47.6379	-3.60012	-3.9913
072319.3	2019-07-23	Iso #4	week 4	23	G12.1a	11.5	-48.1298	719.364	-66.8567	89.4885	-30.9143	2.28	-50.1892	-5.41886	-0.657993
072319.4	2019-07-23	Iso #4	week 4	23	G12.1a	12.6	-42.9706	1073.05	-68.9798	87.6077	-21.3928	4.32	-41.9617	-6.07554	-3.72354
072319.5	2019-07-23	Iso #4	week 4	23	G12.1a	13	-41.58	594.649	-66.5423	86.5191	-27.2888	2.256	-50.2075	-3.148	-1.90973
072319.6	2019-07-23	Iso #4	week 4	23	G12.1a	13.6	-43.6931	1262.99	-66.227	80.9844	-23.3983	3.94	-42.9949	-3.09657	-2.36415
072319.7	2019-07-23	Iso #4	week 4	23	G12.1a	15.8	-42.45	779.447	-64.9455					-3.12419	-1.89701
072419.1	2019-07-24	Iso #4	week 4	24	G12.1a	10.7	-56.1537	489.498	-67.2986	102.913	-29.8767	1.40667	-54.5247	-4.0789	-0.733063
072419.2	2019-07-24	Iso #4	week 4	24	G12.1a	11.2	-46.1	744.21	-66.032	85.0994	-29.4373	1.78	-49.4446	-4.44347	-0.895761
072419.3	2019-07-24	Iso #4	week 4	24	G12.1a	11.5	-41.4874	992.792	-68.1412	84.3765	-35.0037	2.8	-55.5725	-2.7443	0
072419.5	2019-07-24	Iso #4	week 4	24	G12.1a	10.4	-47.136	293.82
080619.13	2019-08-06	Iso #4	week 4	24	G12.1b	16.6	-38.9444	945.04						-2.18173	-0.887041
080619.14	2019-08-06	Iso #4	week 4	24	G12.1b	19.4	-46.4842	976.159	-64.6024	85.8304	-28.0273	2.516	-47.4243	-1.75802	-0.0351689
080619.15	2019-08-06	Iso #4	week 4	24	G12.1b	12.6	-47.5231	410.423
080619.16	2019-08-06	Iso #4	week 4	24	G12.1b	17.2	-38.74	763.757	-69.0782	87.938	-32.1808	2.56	-50.6134	-1.85593	-0.408187
080619.17	2019-08-06	Iso #4	week 4	24	G12.1b	18.7	-37.9375	1512.31	-67.1549	82.671	-33.1247	2.66	-41.8178
080619.18	2019-08-06	Iso #4	week 4	24	G12.1b	17.2	-54.1641	682.098	-67.4711	95.1323	-30.2795	1.676	-55.0659
080619.19	2019-08-06	Iso #4	week 4	24	G12.1b	13.2	-57.9025	599.23	-64.6513	103.482	-33.6304	1.432	-56.4758	-3.1598	-1.71317
080619.20	2019-08-06	Iso #4	week 4	24	G12.1b	14.3	-43.1224	372.965	-66.9117	89.3726	-33.2184	1.7	-63.8733	-5.23472	-0.736956
080619.22	2019-08-06	Iso #4	week 4	24	G12.1b	18.9	-41.0108	1472.21	-66.8065	86.5732	-27.553	3.08286	-42.9121	-3.88676	-0.570169
080619.23	2019-08-06	Iso #4	week 4	24	G12.1b	18.6	-52.05	1304.52	-63.6582	80.9704	-29.3318	2.97429	-47.8603	-4.646	-1.71249
080619.24	2019-08-06	Iso #4	week 4	24	G12.1b	16.4	-54.8788	1021.93	-67.373	95.9425	-32.0028	1.53333	-46.5953	-1.83023	-1.67555
080619.25	2019-08-06	Iso #4	week 4	24	G12.1b	15.9	-38.2286	224.654	-66.4476	92.0824	-35.22	1.46	-52.3987	-1.51878	-0.363173
080719.11	2019-08-07	Iso #4	week 4	25	G12.1b	15.3	-38.82	1062.74						-1.60558	0
080719.13	2019-08-07	Iso #4	week 4	25	G12.1b	14	-49.5748	883.272
080719.14	2019-08-07	Iso #4	week 4	25	G12.1b	14.2	-44.1817	1173.61	-66.5443	102.077	-31.5755	1.69333	-49.413	-1.40235	-0.585774
080719.15	2019-08-07	Iso #4	week 4	25	G12.1b	16.9	-48.8058	1234.93	-66.1135	91.3166	-30.9535	2.03429	-46.7573	-2.08353	-1.3938
080719.17	2019-08-07	Iso #4	week 4	25	G12.1b	16.2	-42.8127	1206.34	-66.2818	95.9449	-30.2342	2.19429	-52.0499	-3.74086	-0.982786
080719.18	2019-08-07	Iso #4	week 4	25	G12.1b	17.6	-42.1	560.989	-65.0627	88.6833	-30.0293	1.76667	-55.4301	-5.86905	-1.44827
080719.19	2019-08-07	Iso #4	week 4	25	G12.1b		-48.6434	624.142	-68.1782	89.3421	-27.6794	3.32	-53.2684	-7.91371	-2.79442
080719.20	2019-08-07	Iso #4	week 4	25	G12.1b	16.2	-43.5407	982.103	-66.2621	80.5596	-32.692	3.655	-44.075	-3.66736	-2.4296
080819.1	2019-08-08	Iso #4	week 4	26	G12.1b	17	-54.6574	740.048
080819.10	2019-08-08	Iso #4	week 4	26	G12.1b	15.2	-51.6792	670.725	-67.5273	86.8537	-35.5268	1.86857	-54.0946	-9.18338	-4.20809
080819.2	2019-08-08	Iso #4	week 4	26	G12.1b	18.1	-54.127	1625.9	-63.1234	81.8816	-32.1859	3.74	-48.3805	-3.85886	-1.89337
080819.3	2019-08-08	Iso #4	week 4	26	G12.1b	17.8	-44.4231	1433.9	-66.1663	91.9283	-22.6237	3.9	-39.2405	-1.70339	-0.165488
080819.4	2019-08-08	Iso #4	week 4	26	G12.1b	16.5	-46.381	976.601	-66.0165	86.209	-38.9048	3.89333	-45.6085	-6.19501	-4.25992
080819.5	2019-08-08	Iso #4	week 4	26	G12.1b	17.3	-49.5651	985.675	-65.6327	95.5018	-31.3644	1.86	-58.6014	-8.19726	-2.79514
080819.7	2019-08-08	Iso #4	week 4	26	G12.1b	16.5	-48.2586	802.915	-65.4397	99.3387	-31.4636	1.536	-51.2268	-4.56231	-2.6165
080819.8	2019-08-08	Iso #4	week 4	26	G12.1b	18.6	-43.1442	1486.65	-65.3598	82.1445	-34.6985	7.66	-32.8369	-3.0229	-0.758123
080819.9	2019-08-08	Iso #4	week 4	26	G12.1b	16.4	-53.3205	802.892	-66.1585	89.2167	-24.5928	3.01714	-47.8734	-1.5961	0
081919.2	2019-08-19	Iso #4	week 4	22	G13.1	16.2	-44.9238	1574.12						-1.73967	-0.536763
081919.3	2019-08-19	Iso #4	week 4	22	G13.1	17.3	-46.1287	424.809
081919.4	2019-08-19	Iso #4	week 4	22	G13.1	16.4	-45.5651	605.607						-4.31521	-4.00073
081919.7	2019-08-19	Iso #4	week 4	22	G13.1	13.2	-49.3425	1475						-2.47882	-2.05028
082019.12	2019-08-20	Iso #4	week 4	23	G13.1	13.4	-40.4735	919.377	-66.3799	89.2864	-29.4067	2.624	-47.7356	-2.97071	-2.64215
082019.13	2019-08-20	Iso #4	week 4	23	G13.1	13.4	-47.972	673.591
082019.14	2019-08-20	Iso #4	week 4	23	G13.1	17.5	-41.0764	650.988	-67.3708	83.9723	-36.1176	3.58	-45.8984	-4.07226	-2.03725
082019.15	2019-08-20	Iso #4	week 4	23	G13.1	13.1	-53.1324	610.897	-67.7933	96.1517	-32.6538	2.96	-54.184	-3.23603	-1.89455
082019.16	2019-08-20	Iso #4	week 4	23	G13.1	10.1	-45.4972	737.902	-66.3292	81.6185	-33.7524	2.12	-53.894
082019.18	2019-08-20	Iso #4	week 4	23	G13.1	10.3	-48.6668	653.798	-65.576	103.036	-32.0994	1.44	-60.7859	-8.13173	-1.03881
082019.19	2019-08-20	Iso #4	week 4	23	G13.1	15.8	-48.5115	933.81	-67.4372	95.488	-37.557	1.96	-54.3823	-4.47559	-3.98588
082019.20	2019-08-20	Iso #4	week 4	23	G13.1	15.6	-48.8085	1170.19	-67.721	91.8647	-34.5023	1.87143	-52.8564	-4.19129	-3.79883
082119.11	2019-08-21	Iso #4	week 4	24	G13.1	13.1	-37.383	1289.39	-65.5356	84.0231	-31.5125	2.86	-43.4448
082119.12	2019-08-21	Iso #4	week 4	24	G13.1	16.7	-41.4707	1174.55	-65.9474	96.3167	-32.789	1.71143	-50.7769	-2.12277	-1.56765
082119.13	2019-08-21	Iso #4	week 4	24	G13.1	16.9	-41.0071	1483.63
082119.14	2019-08-21	Iso #4	week 4	24	G13.1	15.3	-38.2942	687.729
082119.16	2019-08-21	Iso #4	week 4	24	G13.1	17	-49.644	893.385	-66.4426	83.7068	-32.9546	2.42571	-48.8804	-1.84225	-0.609864
082119.17	2019-08-21	Iso #4	week 4	24	G13.1	13	-44.8176	1033.63	-66.2263	82.8583	-25.3296	4.98	-41.3513
082119.18	2019-08-21	Iso #4	week 4	24	G13.1	16.7	-48.6079	1126.74	-64.7973	93.8064	-31.3198	3.72	-49.142	-5.25886	-1.10539
082119.19	2019-08-21	Iso #4	week 4	24	G13.1	14	-57.7064	339.258	-64.1031	88.7257	-32.7606	2.15667	-56.6711	-5.986	-0.822058
082119.20	2019-08-21	Iso #4	week 4	24	G13.1	16.5	-45.1883	797.681	-62.9029	89.8673	-35.7797	1.56571	-54.9883	-2.97752	-1.68761
082119.21	2019-08-21	Iso #4	week 4	24	G13.1	16.5	-45.3532	1061.22	-64.181	101.539	-29.1225	1.66857	-48.584	-1.96183	-1.73907
082119.22	2019-08-21	Iso #4	week 4	24	G13.1	14.2	-48.3336	863.36	-67.1508	94.3496	-27.2903	2.42	-46.3181	-2.69728	-2.33755
082219.1	2019-08-22	Iso #4	week 4	25	G13.1	16.8	-43.1638	757.559						-3.64774	-2.45108
082219.10	2019-08-22	Iso #4	week 4	25	G13.1	10.5	-56.0235	724.294	-67.026	103.199	-32.1299	2.05333	-51.9511	-6.48716	-2.84479
082219.2	2019-08-22	Iso #4	week 4	25	G13.1	16.1	-40.4598	1269.8						-7.59372	-3.2519
082219.3	2019-08-22	Iso #4	week 4	25	G13.1	19.3	-44.9167	903.02	-68.1437	89.8173	-35.2478	2.312	-57.3242	-8.44953	-4.19464
082219.5	2019-08-22	Iso #4	week 4	25	G13.1	15.6	-48.0522	571.601	-63.963	90.0326	-38.9938	6.195	-40.3366	-3.08979	0
082219.6	2019-08-22	Iso #4	week 4	25	G13.1	17.4	-38.3471	1546.79						-1.83117	-0.810551
082219.7	2019-08-22	Iso #4	week 4	25	G13.1	16.7	-42.494	1044.64	-64.1047	91.7027	-33.0149	1.65	-51.7985
082219.8	2019-08-22	Iso #4	week 4	25	G13.1	12.8	-46.9142	738.831	-65.5388	96.9262	-30.2277	3.3	-51.8494	-0.898578	-0.245641
082219.9	2019-08-22	Iso #4	week 4	25	G13.1	15.6	-53.5159	763.415	-66.6844	98.026	-30.5227	2.10333	-51.7883	-10.4926	-3.17141
082319.1	2019-08-23	Iso #4	week 4	26	G13.1	18.7	-45.9494	1150.94	-65.9724	82.8843	-32.9336	2.60333	-52.3376	-5.34946	-0.178858
082319.2	2019-08-23	Iso #4	week 4	26	G13.1	17.9	-42.4664	456.847	-63.0885	81.5923	-34.495	2.20667	-49.6826	-2.15062	-1.15371
082319.3	2019-08-23	Iso #4	week 4	26	G13.1	17.4	-38.2293	731.187
082319.4	2019-08-23	Iso #4	week 4	26	G13.1	19.2	-43.5971	243.795
082319.5	2019-08-23	Iso #4	week 4	26	G13.1	18.1	-47.8439	795.777	-63.9546	89.091	-37.9893	1.99333	-50.4456	-2.4181	-1.75949
100719.1	2019-10-07	Iso #4	week 4	26	G13.1	17.5	-39.3011	625.4	-65.2674	89.8646	-34.2407	3.16	-43.3044	-2.63577	-2.07567
100719.2	2019-10-07	Iso #4	week 4	26	G13.1		-52.0162	831.665	-63.6033	80.6397	-33.4244	3.1	-46.257
100719.3	2019-10-07	Iso #4	week 4	26	G13.1	12.2	-42.4617	788.868	-67.2685	95.6987	-34.2712	2.208	-53.9795	-5.79928	-4.39034
100719.4	2019-10-07	Iso #4	week 4	26	G13.1	18.5	-43.1009	1265.87	-65.9831	92.7121	-32.4097	2.59714	-55.0101	-3.36619	-2.94469
100719.5	2019-10-07	Iso #4	week 4	26	G13.1	11.2	-44.3151	763.285	-64.3126	84.1032	-28.8137	3.41333	-48.2381	-3.42412	-3.14511
100719.6	2019-10-07	Iso #4	week 4	26	G13.1	10.7	-47.6975	1206.48	-66.719	100.942	-34.5415	1.50286	-53.9943	-11.2273	-9.12218
100719.7	2019-10-07	Iso #4	week 4	26	G13.1	13.1	-38.7283	520.993	-63.7202	91.3895	-26.3367	3.73333	-49.408	-1.82885	-1.18906
100819.1	2019-10-08	Iso #4	week 4	22	G11.1	15.8	-38.637	1324.8						-2.65415	-0.890819
100819.2	2019-10-08	Iso #4	week 4	22	G11.1	10.1	-45.2834	827.158	-62.6906	83.412	-22.9187	3.56	-44.9219	-3.53828	-2.09475
100819.3	2019-10-08	Iso #4	week 4	22	G11.1	10.3	-49.2276	963.292
100819.4	2019-10-08	Iso #4	week 4	22	G11.1	14.6	-55.3459	476.194	-65.9555	90.0796	-26.947	2.27333	-45.9544	-8.46597	-0.874059
100819.41	2019-10-08	Iso #4	week 4	22	G11.1		-46.6329	1017.34						-3.93996	-1.82752
100819.6	2019-10-08	Iso #4	week 4	22	G11.1	18.4	-45.8363	1141.17						-0.905592	-0.419424
100819.7	2019-10-08	Iso #4	week 4	22	G11.1	17.3	-46.5374	1233.7						-1.54531	0
100819.8	2019-10-08	Iso #4	week 4	22	G11.1	17.8	-58.8266	479.849	-64.1829	88.8513	-25.5432	2.41667	-55.6946	-4.23828	-2.09415
101019.1	2019-10-10	Iso #4	week 4	24	G11.1	13.9	-40.0293	354.227						-5.87206	-0.5129
101019.2	2019-10-10	Iso #4	week 4	24	G11.1	13.4	-45.0053	990.157						-4.57657	-1.68231
101019.3	2019-10-10	Iso #4	week 4	24	G11.1	13.8	-42.6648	929.229	-66.8616	89.8261	-24.1013	3.56	-48.9578	-10.1445	-3.51745
101019.4	2019-10-10	Iso #4	week 4	24	G11.1	13.8	-40.3292	1004.01	-64.6734	87.4762	-30.4749	1.892	-48.7976	-4.03861	-0.0357375
101019.5	2019-10-10	Iso #4	week 4	24	G11.1	11.2	-43.5474	1157.71	-66.0016	90.7427	-24.9111	4	-46.2646	-2.23143	-1.12883
101019.6	2019-10-10	Iso #4	week 4	24	G11.1	12.6	-38.9776	1134.65						-1.97139	0
101019.7	2019-10-10	Iso #4	week 4	24	G11.1	7	-37.8681	466.894	-66.3309	86.1113	-28.7679	2.67667	-50.2675	-5.8915	-2.03977
101019.8	2019-10-10	Iso #4	week 4	24	G11.1	12.7	-55.3753	517.075						-4.33547	-3.0174
101019.9	2019-10-10	Iso #4	week 4	24	G11.1	15.4	-39.0276	1138.08	-66.3477	94.4086	-29.007	3	-53.8178	-3.84229	-2.63083
111119.6	2019-11-11	Iso #4	week 4	22	G16.1	13.7	-48.7041	1163.63	-65.3836	105.018	-34.2407	3.085	-53.2532
111119.9	2019-11-11	Iso #4	week 4	22	G16.1	10	-37.5381	622.71	-67.3932	93.1297	-30.3345	3.86667	-47.5159	-3.63623	-0.868129
111219.4	2019-11-12	Iso #4	week 4	23	G16.1	11.2	-53.1405	372.651	-65.3086	85.0168	-19.989	4.912	-56.3416	-5.86079	-0.57424
111219.5	2019-11-12	Iso #4	week 4	23	G16.1	10.4	-47.3895	698.147	-66.7032	90.3035	-22.5321	2.73333	-46.7529	-3.59277	-1.06444
111219.7	2019-11-12	Iso #4	week 4	23	G16.1	15.8	-61.0695	535.858	-66.2956	90.0841	-22.2626	3.36	-43.7469	-2.94733	-2.25543
111219.71	2019-11-12	Iso #4	week 4	23	G16.1		-39.8202	733.41
111319.7	2019-11-13	Iso #4	week 4	24	G16.1	12.5	-59.4543	336.551	-64.2236	98.739	-26.7487	1.475	-60.5545
111319.8	2019-11-13	Iso #4	week 4	24	G16.1	11	-52.3363	493.793	-64.739	86.0533	-28.717	2.08857	-55.5899	-3.39286	-1.61082
111519.2	2019-11-15	Iso #4	week 4	26	G16.1	17	-51.0777	992.407	-66.8045	97.7188	-26.1536	2.61333	-44.1081	-4.32755	-3.26146
111519.4	2019-11-15	Iso #4	week 4	26	G16.1	17.4	-48.4527	811.047	-61.9042	102.084	-30.896	2.104	-53.009
060420.10	2020-06-04	Iso #4	week 4	22	G16.1	10.4	-46.312	577.796						-1.28962	-0.081576
060420.12	2020-06-04	Iso #4	week 4	22	G16.1	14.8	-41.9432	1044.84						-2.36538	-0.981098
060420.13	2020-06-04	Iso #4	week 4	22	G16.1	10.7	-57.9735	385.922	-67.081	84.1556	-27.8244	1.91	-60.0739	-4.20762	-1.14989
060420.14	2020-06-04	Iso #4	week 4	22	G16.1	10.9	-55.6085	409.952	-67.9455	96.6259	-29.3762	1.812	-61.3342	-1.78362	-0.483121
060420.9	2020-06-04	Iso #4	week 4	22	G16.1	9.8	-53.2765	713.014	-65.229	92.471	-26.5656	2.07667	-47.9736	-2.417	-1.38197
060820.3	2020-06-08	Iso #4	week 4	26	G16.1	11.3	-47.8378	919.782	-66.9651	90.8197	-30.2734	1.54667	-47.5566	-4.40466	-1.80161
061520.5	2020-06-15	Iso #4	week 4	22	G14.1	8.1	-42.0766	716.518	-67.446	83.8165	-27.5225	2.32	-42.7944	-1.4765	-0.28512
061520.6	2020-06-15	Iso #4	week 4	22	G14.1	9.1	-40.9165	824.151	-63.6302	83.2792	-28.1721	2.32857	-48.0129
061520.7	2020-06-15	Iso #4	week 4	22	G14.1	10.3	-40.4053	418.642	-70.0345	81.2643	-38.5234	1.64	-45.8577	-4.09166	-2.40912
061520.8	2020-06-15	Iso #4	week 4	22	G14.1	9	-40.3407	798.288	-65.5239	83.3652	-29.3045	2.35	-44.3344	-4.10364	-1.53316
061620.1	2020-06-16	Iso #4	week 4	23	G14.1	10.3	-46.1699	449.708	-65.1809	94.9889	-29.2892	1.38	-45.5246	-3.09126	-0.635335
061620.2	2020-06-16	Iso #4	week 4	23	G14.1	12.6	-39.7834	318.132						-1.86257	0
061620.3	2020-06-16	Iso #4	week 4	23	G14.1	20.5	-46.0265	1047.42
061620.4	2020-06-16	Iso #4	week 4	23	G14.1	17.6	-42.5255	433.531
061620.5	2020-06-16	Iso #4	week 4	23	G14.1	12.3	-46.202	662.984						-3.81383	-3.32616
061620.6	2020-06-16	Iso #4	week 4	23	G14.1	9.2	-53.5461	698.779	-66.2413	96.445	-36.4729	1.74	-55.3763	-6.10674	-4.3255
061720.2	2020-06-17	Iso #4	week 4	24	G14.1	8.1	-54.9603	334.39	-65.5952	97.7251	-30.2582	1.26333	-54.8604	-8.61513	-5.42095
061920.1	2020-06-19	Iso #4	week 4	26	G14.1	10.7	-44.6082	710.62	-66.5031	95.3727	-38.2996	1.13143	-61.07	-3.63863	-1.50819
071020.11	2020-07-10	Iso #4	week 4	22	G20.1	10.6	-52.9164	692.163	-66.5488	86.904	-27.0081	3.8	-46.0815	-3.98586	-1.17045
071020.13	2020-07-10	Iso #4	week 4	22	G20.1	13.1	-39.6769	759.253	-64.6956	93.9264	-30.7821	1.51	-45.2321
080519.10	2019-08-05	Q2-04	week 5	36	G12.1a	13.4	-53.2155	803.349	-63.4331	87.1605	-36.9822	2.10333	-51.4323
080519.11	2019-08-05	Q2-04	week 5	36	G12.1a	19.4	-57.2392	868.798	-65.9051	90.6701	-23.5138	2.03	-49.8352	-6.11211	-4.72408
080519.12	2019-08-05	Q2-04	week 5	36	G12.1a	17.3	-39.9618	946.756	-65.1929	80.1029	-32.1655	2.33429	-48.4358	-5.29838	-0.640559
080519.13	2019-08-05	Q2-04	week 5	36	G12.1a	15.6	-49.7105	655.03	-66.114	94.2207	-34.4413	1.61429	-59.0472	-3.08988	-1.44963
080519.14	2019-08-05	Q2-04	week 5	36	G12.1a	15.3	-46.9268	834.052	-66.0739	81.1191	-32.4158	2.256	-52.7771	-6.68144	-5.04745
080519.15	2019-08-05	Q2-04	week 5	36	G12.1a	19.4	-54.1778	369.028	-64.6432	95.4537	-33.429	1.352	-60.199	-5.884	-1.13363
080519.16	2019-08-05	Q2-04	week 5	36	G12.1a		-55.5894	999.841	-66.7724	87.1276	-32.486	1.39	-57.1187	-7.94722	-2.89998
080519.17	2019-08-05	Q2-04	week 5	36	G12.1a	16.7	-56.7618	915.525	-63.5686	90.7903	-33.2591	1.37333	-59.8572	-4.17024	-1.11311
080519.18	2019-08-05	Q2-04	week 5	36	G12.1a	20.8	-48.1216	955.214	-63.7717	80.414	-31.3772	2.80667	-50.6134	-5.78229	-4.03026
080519.9	2019-08-05	Q2-04	week 5	36	G12.1a	11.7	-58.8596	692.3	-63.8353	93.5071	-41.7393	1.92857	-49.235	-7.4547	-1.4379
081419.1	2019-08-14	Q2-04	week 5	32	G12.1b	16.3	-51.5032	658.042	-69.1787	100.246	-45.8221	3.44	-57.9224	-4.283	-3.10706
081419.10	2019-08-14	Q2-04	week 5	32	G12.1b		-46.4862	1067.1	-64.9425
081419.2	2019-08-14	Q2-04	week 5	32	G12.1b	18.1	-47.0025	1179.42	-66.1422	87.9419	-31.7281	2.83333	-47.9533	-7.51591	0
081419.3	2019-08-14	Q2-04	week 5	32	G12.1b	16.6	-40.0061	1504.39	-64.7744
081419.4	2019-08-14	Q2-04	week 5	32	G12.1b		-45.6797	953.061	-65.7298	84.0556	-34.9513	3.26857	-48.6189	-4.4361	-2.59766
081419.5	2019-08-14	Q2-04	week 5	32	G12.1b	15.7	-54.028	408.606	-65.9144	99.2335	-31.9153	2.416	-50.3906	-8.99711	-2.28205
081419.6	2019-08-14	Q2-04	week 5	32	G12.1b	16.4	-46.196	1226.05	-65.2511	92.6559	-31.8705	1.94667	-53.4617
081419.7	2019-08-14	Q2-04	week 5	32	G12.1b	12.2	-48.5401	589.363	-67.2439	98.5346	-30.6193	2.56	-49.3113	-8.82979	-3.2736
081419.8	2019-08-14	Q2-04	week 5	32	G12.1b	13.9	-41.8291	604.959	-65.4837	92.6368	-28.9383	2.31	-49.1943	-3.30347	-2.46171
081419.9	2019-08-14	Q2-04	week 5	32	G12.1b	11.1	-49.9943	594.97	-67.81	99.6806	-31.25	4.12667	-52.124	-8.71113	-5.95265
081519.18	2019-08-15	Q2-04	week 5	33	G12.1b	20.1	-54.2547	710.659	-63.7706	95.0715	-31.1686	1.33333	-54.2196	-2.389	-0.436361
081519.19	2019-08-15	Q2-04	week 5	33	G12.1b	11.6	-52.1893	729.71	-66.3244	95.5755	-31.2805	1.35	-53.772
081519.20	2019-08-15	Q2-04	week 5	33	G12.1b	12.4	-44.2352	1256.24
081519.21	2019-08-15	Q2-04	week 5	33	G12.1b	12.5	-45.0529	963.808	-63.2794	86.3456	-31.2144	1.68	-51.7934	-2.909	-1.21719
081519.22	2019-08-15	Q2-04	week 5	33	G12.1b	16.1	-55.754	434.991	-66.9402	92.3308	-31.8222	1.38	-49.5224
081519.23	2019-08-15	Q2-04	week 5	33	G12.1b	18.6	-47.9063	1017.66	-66.1955	93.8096	-31.4287	2.13143	-50.2886	-5.196	-4.14077
081519.24	2019-08-15	Q2-04	week 5	33	G12.1b	12.3	-57.0673	1024.42	-66.5437	81.6423	-28.0533	3.605	-43.3731	-4.96444	-4.44048
082919.13	2019-08-29	Q2-04	week 5	32	G13.1	15.1	-50.6033	879.421	-65.1706	108.531	-33.8999	3.93333	-55.9489	-3.21389	-2.72284
082919.14	2019-08-29	Q2-04	week 5	32	G13.1	18.1	-49.3871	708.517	-68.1754	92.4522	-29.6783	2.32	-45.8527
082919.15	2019-08-29	Q2-04	week 5	32	G13.1	18.2	-50.5958	634.897	-67.5396	96.5414	-34.9426	1.88	-51.356	-3.66784	-2.14186
082919.16	2019-08-29	Q2-04	week 5	32	G13.1	14.3	-41.5307	1026.43	-66.9043	90.3985	-32.4227	2.28286	-42.5677	-1.67736	-1.3737
082919.18	2019-08-29	Q2-04	week 5	32	G13.1	16.3	-41.1243	672.442	-67.3412	82.4474	-34.0169	1.56	-53.6092	-5.7351	-3.81448
082919.19	2019-08-29	Q2-04	week 5	32	G13.1		-54.8337	706.964	-65.4943	81.4245	-40.624	1.88667	-57.3527	-3.91416	-2.22027
082919.20	2019-08-29	Q2-04	week 5	32	G13.1	16.3	-45.9616	1084.06	-61.5357
082919.21	2019-08-29	Q2-04	week 5	32	G13.1	19.2	-48.9074	784.448	-67.9975	98.5355	-33.8236	1.37	-54.8553	-5.89422	-4.22457
082919.22	2019-08-29	Q2-04	week 5	32	G13.1		-45.0188	648.937	-66.3543	99.9999	-31.8604	4.14	-56.6559	-8.92514	-6.5955
082919.23	2019-08-29	Q2-04	week 5	32	G13.1	12.7	-52.0106	785.832	-66.0135	97.887	-34.8162	1.32857	-59.2869	-2.08667	-0.457449
082919.24	2019-08-29	Q2-04	week 5	32	G13.1	11.7	-48.7505	594.888	-65.3757	94.7946	-36.555	1.63	-56.2642	-4.05441	-2.43985
083019.11	2019-08-30	Q2-04	week 5	33	G13.1	15.8	-45.6343	1172.24	-64.6399	89.1281	-28.7606	1.60286	-53.336	-2.10419	-1.63903
083019.12	2019-08-30	Q2-04	week 5	33	G13.1	15.9	-46.4009	1191.81	-66.3432	87.4766	-34.1644	2.29	-44.342	-4.2564	-3.7081
083019.13	2019-08-30	Q2-04	week 5	33	G13.1	17.8	-51.5384	831.228	-66.9645	101.831	-35.9446	1.49	-52.4445	-3.6937	-3.0517
083019.15	2019-08-30	Q2-04	week 5	33	G13.1	19.9	-55.4593	633.058	-65.1093	87.674	-33.136	1.78	-54.3823
083019.16	2019-08-30	Q2-04	week 5	33	G13.1	14.4	-49.5334	700.448	-66.7811	94.9082	-29.9988	1.87333	-55.8675	-4.36168	-3.27784
083019.17	2019-08-30	Q2-04	week 5	33	G13.1	17.5	-54.5558	827.845	-66.3686	97.6644	-30.6956	1.50333	-50.4964	-3.86706	-1.49593
083019.18	2019-08-30	Q2-04	week 5	33	G13.1	17.6	-46.9374	772.652	-67.0901	96.1611	-31.4941	1.808	-52.1057	-3.20925	-1.5728
083019.19	2019-08-30	Q2-04	week 5	33	G13.1	18.9	-49.337	1098.67	-65.3877	88.8993	-31.3198	2.30571	-52.7823	-2.174	-1.76322
083019.20	2019-08-30	Q2-04	week 5	33	G13.1	18.7	-40.6925	1178.34	-65.6149					-4.63553	-3.02421
083119.1	2019-08-31	Q2-04	week 5	34	G13.1	19.7	-57.9387	641.239	-66.3049	97.1073	-34.2051	1.83333	-57.1391	-5.41807	-4.11751
083119.2	2019-08-31	Q2-04	week 5	34	G13.1	18.1	-44.7446	684.786	-64.4607	82.5805	-33.1879	1.99	-54.4586	-7.02475	-5.54435
083119.4	2019-08-31	Q2-04	week 5	34	G13.1	10.3	-37.027	562.01	-66.2448	81.4425	-30.3101	2.88	-48.6816	-3.38858	-1.73712
083119.5	2019-08-31	Q2-04	week 5	34	G13.1	14.5	-46.6473	894.858	-65.5415	83.6018	-28.0228	2.876	-49.3835	-5.5117	-3.99706
083119.7	2019-08-31	Q2-04	week 5	34	G13.1	18.9	-49.4992	814.356	-66.6999	86.8339	-32.4936	2.18	-54.1077	-8.88905	-8.10982
083119.8	2019-08-31	Q2-04	week 5	34	G13.1	14.4	-50.7159	1152.77	-65.1068	84.6584	-28.8798	3.82	-47.9431	-4.793	-2.17921
083119.9	2019-08-31	Q2-04	week 5	34	G13.1	16.7	-56.9172	719.401	-67.1749	95.719	-34.1695	1.61	-53.5431	-6.64429	-4.75385
090119.1	2019-09-01	Q2-04	week 5	35	G13.1	15	-54.8876	1019.4	-67.7268	104.312	-31.3416	1.44333	-59.3923	-9.1076	-6.07947
090119.10	2019-09-01	Q2-04	week 5	35	G13.1	11.8	-49.7348	560.251	-66.6367	96.5439	-30.4667	1.06	-56.7474	-8.77566	-8.43023
090119.2	2019-09-01	Q2-04	week 5	35	G13.1	15.9	-43.4017	724.01	-67.1022	94.3544	-28.4119	2.68	-53.2227
090119.4	2019-09-01	Q2-04	week 5	35	G13.1	16.1	-54.3784	444.906	-66.3014	99.2299	-30.4871	1.96	-55.9285	-3.5258	-1.74335
090119.5	2019-09-01	Q2-04	week 5	35	G13.1	15.6	-52.4915	675.967	-65.2805	102.787	-34.5459	1.375	-57.7927	-4.80015	-0.982606
090119.7	2019-09-01	Q2-04	week 5	35	G13.1	11.9	-43.7693	662.804	-67.4473	94.8155	-29.7974	2.844	-55.7007	-5.15224	-1.42498
090119.8	2019-09-01	Q2-04	week 5	35	G13.1	16.8	-39.2974	574.316	-67.6872	82.0534	-36.3541	2.265	-54.1763	-4.11018	-1.89009
090119.9	2019-09-01	Q2-04	week 5	35	G13.1	17.6	-49.561	390.913	-62.77	88.3692	-36.082	1.27	-58.1512	-8.70947	-6.02643
101419.1	2019-10-14	Q2-04	week 5	33	G13.1b	13.1	-47.4992	1018.92
101419.2	2019-10-14	Q2-04	week 5	33	G13.1b	15.2	-55.9791	504.185	-64.2183	80.6978	-26.5299	2.61333	-47.5667
101419.3	2019-10-14	Q2-04	week 5	33	G13.1b	12.8	-47.5725	522.483	-65.6899	98.4505	-27.9236	2.92	-51.4832	-3.84735	-2.05144
101419.4	2019-10-14	Q2-04	week 5	33	G13.1b	19.8	-50.8364	802.984	-65.7814	101.284	-28.6764	2.05333	-48.4721	-3.30027	-0.662694
101419.5	2019-10-14	Q2-04	week 5	33	G13.1b	14.5	-39.9103	557.366	-66.213	87.7889	-26.8351	2.685	-52.6581
101419.6	2019-10-14	Q2-04	week 5	33	G13.1b	18.8	-52.8105	835.958
101519.10	2019-10-15	Q2-04	week 5	34	G13.1b	9	-39.3611	875.489	-65.8247	96.4382	-39.1671	1.96571	-50.0663	-2.45053	-0.0322751
101519.6	2019-10-15	Q2-04	week 5	34	G13.1b	10.9	-50.1362	808.321	-67.5575	94.5757	-33.2642	2.495	-49.6597	-2.05638	-1.28648
101519.7	2019-10-15	Q2-04	week 5	34	G13.1b	13.1	-39.3191	1029.86						-7.35915	-4.89007
101519.8	2019-10-15	Q2-04	week 5	34	G13.1b	13.9	-41.1079	1181.14	-66.0093	88.8822	-32.7555	3.37	-47.1547	-4.86819	-2.29913
101519.9	2019-10-15	Q2-04	week 5	34	G13.1b	10.5	-38.6464	1031.15						-12.1001	-7.78628
080519.1	2019-08-05	Iso #4	week 5	36	G12.1a	13.9	-48.27	1170.07	-66.834	88.5451	-32.7279	1.74	-48.3834	-6.57637	-2.94223
080519.2	2019-08-05	Iso #4	week 5	36	G12.1a	11.4	-47.4235	1025.15	-65.4727	96.8578	-33.0811	1.58286	-58.973	-7.01064	-1.41103
080519.3	2019-08-05	Iso #4	week 5	36	G12.1a	12.7	-48.2725	782.597	-64.9554	95.3466	-35.8102	1.26	-60.7256	-8.51775	-4.26084
080519.4	2019-08-05	Iso #4	week 5	36	G12.1a	17.8	-47.755	1280.55	-66.4477					-3.57758	-0.379424
080519.5	2019-08-05	Iso #4	week 5	36	G12.1a	19	-51.5698	746.517	-63.365	88.4678	-31.8473	2.29714	-53.4973	-8.76931	-4.3494
080519.6	2019-08-05	Iso #4	week 5	36	G12.1a	20.7	-48.078	805.564	-66.4169	88.9563	-32.7061	2.29714	-54.3518	-4.06554	-2.03172
080519.7	2019-08-05	Iso #4	week 5	36	G12.1a		-48.4966	1055.11
080519.8	2019-08-05	Iso #4	week 5	36	G12.1a	16.7	-46.8375	739.846	-67.4113	94.5312	-32.7962	2.48667	-57.6579
081419.11	2019-08-14	Iso #4	week 5	32	G12.1b	10	-55.5854	285.046	-65.1729	100.41	-28.4678	1.19	-56.2337	-11.0844	0
081419.12	2019-08-14	Iso #4	week 5	32	G12.1b	13.5	-45.5415	1073.41	-66.0836	81.8205	-36.8398	2.15	-44.3929
081419.13	2019-08-14	Iso #4	week 5	32	G12.1b	16.4	-50.5938	1035.44	-66.2282	94.4526	-32.3966	2.77429	-50.0314	-2.7394	-0.777719
081519.1	2019-08-15	Iso #4	week 5	33	G12.1b	16.2	-54.1418	717.577	-65.6562	97.9743	-31.9926	2.06667	-53.3854
081519.10	2019-08-15	Iso #4	week 5	33	G12.1b	14.1	-44.9074	1091.93	-66.5912	84.9811	-27.2644	4.576	-48.5535	-0.682599	-0.20449
081519.11	2019-08-15	Iso #4	week 5	33	G12.1b	15.9	-42.6585	1439.12	-66.6454	83.1162	-26.825	6.16	-44.3246	-2.44143	-0.873935
081519.12	2019-08-15	Iso #4	week 5	33	G12.1b	17	-50.3851	1016.07	-69.3053	95.764	-29.2562	4.46	-51.7273	-7.76373	-4.02081
081519.13	2019-08-15	Iso #4	week 5	33	G12.1b	14.5	-47.9012	719.948	-66.2688	92.4895	-29.6692	2.388	-55.4016	-7.07645	-1.658
081519.14	2019-08-15	Iso #4	week 5	33	G12.1b	15.6	-58.2236	950.73	-63.7231	93.1624	-30.3345	1.82333	-57.6172	-1.53025	-0.601772
081519.15	2019-08-15	Iso #4	week 5	33	G12.1b	18.6	-47.9217	973.681	-63.4118	84.8657	-22.3592	6.37333	-41.6667	-0.972264	-0.816902
081519.16	2019-08-15	Iso #4	week 5	33	G12.1b		-42.2539	1071.43	-66.3554	83.0536	-35.7056	2.72	-54.1534	-9.08869	-7.11999
081519.17	2019-08-15	Iso #4	week 5	33	G12.1b	13.8	-46.7805	682.383	-66.0047	82.7894	-23.4985	3.92667	-52.6225	-8.89951	-7.3026
081519.3	2019-08-15	Iso #4	week 5	33	G12.1b	17.3	-45.1512	1222.99	-66.2456	88.9812	-28.8879	2.764	-47.1252	-4.65754	-0.718834
081519.4	2019-08-15	Iso #4	week 5	33	G12.1b	13.3	-42.486	1052.47	-63.6993	87.3708	-32.0485	1.88	-50.1862	-2.47002	-1.72003
081519.5	2019-08-15	Iso #4	week 5	33	G12.1b	16.4	-38.848	1505.18	-66.7801	87.3489	-31.0625	3.56571	-42.6505	-7.91649	-5.49213
081519.6	2019-08-15	Iso #4	week 5	33	G12.1b	13.1	-45.4022	1227.48						-1.54451	-1.02201
081519.9	2019-08-15	Iso #4	week 5	33	G12.1b	16.1	-54.3869	782.84	-67.6335	93.1288	-35.226	4.88286	-54.6395	-1.76934	-1.59456
082919.1	2019-08-29	Iso #4	week 5	32	G13.1	15.4	-51.1114	768.653	-62.1333	98.9579	-35.1766	1.56667	-54.9571	-2.59865	-0.30432
082919.10	2019-08-29	Iso #4	week 5	32	G13.1	14.8	-45.075	690.813	-65.5313	84.4776	-37.4959	1.25	-56.2948	-7.05411	-5.87886
082919.11	2019-08-29	Iso #4	week 5	32	G13.1	16	-43.3364	967.083	-67.2601	81.4762	-30.3599	2.59	-51.9206	-2.95283	-0.9026
082919.2	2019-08-29	Iso #4	week 5	32	G13.1	13.4	-54.9935	693.948	-66.6354	103.23	-32.5492	1.35143	-53.2314	-7.12023	-5.30711
082919.3	2019-08-29	Iso #4	week 5	32	G13.1	19.7	-40.4732	777.884	-61.5719	83.6056	-32.8166	1.28	-55.0995	-4.37688	-1.52774
082919.4	2019-08-29	Iso #4	week 5	32	G13.1	11.2	-46.5304	643.2	-64.2311	94.0925	-36.1176	1.32	-56.015	-3.78798	0
082919.6	2019-08-29	Iso #4	week 5	32	G13.1	13.3	-46.0793	1004.16	-65.8796	96.562	-28.8391	1.48	-50.6958	-1.30248	0
082919.7	2019-08-29	Iso #4	week 5	32	G13.1	15.5	-45.9335	850.154	-66.0794	82.4419	-32.5572	2.26667	-47.2616	-4.70824	-3.53484
082919.8	2019-08-29	Iso #4	week 5	32	G13.1	16.7	-46.4129	1180.46	-65.6107	81.0577	-30.187	3.23333	-44.0369	-1.72475	-0.818469
082919.81	2019-08-29	Iso #4	week 5	32	G13.1		-40.3168	1114.64	-65.192	88.8991	-31.3365	2.71667	-46.0917
082919.9	2019-08-29	Iso #4	week 5	32	G13.1	14.6	-40.7594	582.205	-65.3704	88.0084	-38.6108	2.104	-52.6672	-2.53607	-1.56212
083019.1	2019-08-30	Iso #4	week 5	33	G13.1	19.2	-43.6105	1118.68	-66.3487	89.0172	-33.6975	2.432	-48.6511	-4.0695	0
083019.10	2019-08-30	Iso #4	week 5	33	G13.1	19.8	-44.6519	993.328	-65.1234	91.7652	-27.0894	5.54667	-38.0147	-2.31538	0
083019.3	2019-08-30	Iso #4	week 5	33	G13.1	15.2	-45.4728	638.345
083019.4	2019-08-30	Iso #4	week 5	33	G13.1	14.9	-48.5054	655.256	-66.7749	80.2369	-23.5977	6.8225	-43.9606	-1.22743	-0.924432
083019.5	2019-08-30	Iso #4	week 5	33	G13.1	13.7	-43.286	880.297	-65.8462	80.2658	-29.2206	2.80333	-47.6837	-5.97315	-1.84486
083019.6	2019-08-30	Iso #4	week 5	33	G13.1	12.5	-40.5853	627.244	-66.0938	93.0027	-29.2816	2.105	-53.7338	-4.3758	-3.32615
083019.7	2019-08-30	Iso #4	week 5	33	G13.1	18.8	-48.7268	933.725	-63.7187	83.7199	-23.8281	3.328	-38.4705
083019.8	2019-08-30	Iso #4	week 5	33	G13.1	16.4	-43.6248	934.873	-66.7619	91.7787	-26.5045	6.36	-44.7083	-4.0176	-1.48193
083019.9	2019-08-30	Iso #4	week 5	33	G13.1	17.8	-40.9484	1187.86						-2.06911	-1.38018
083119.11	2019-08-31	Iso #4	week 5	34	G13.1	12.5	-53.6488	690.722	-65.6013	94.2674	-35.8734	1.97333	-48.0906	-3.31799	-1.77629
083119.12	2019-08-31	Iso #4	week 5	34	G13.1	16.7	-51.0046	880.614	-67.5785	102.155	-33.2642	1.41	-56.3812	-2.19889	-0.810077
083119.13	2019-08-31	Iso #4	week 5	34	G13.1	17.3	-45.4798	424.26	-65.1441	92.5032	-32.0663	1.5	-53.2913	-5.49482	-2.90971
083119.14	2019-08-31	Iso #4	week 5	34	G13.1	20.2	-51.9505	224.242	-63.8316	81.2877	-33.1116	1.76	-52.6428	-3.72761	-1.8384
083119.15	2019-08-31	Iso #4	week 5	34	G13.1	18.8	-44.9851	933.322	-61.2486	86.374	-24.4293	2.93	-47.2107	-4.24805	-2.78053
083119.16	2019-08-31	Iso #4	week 5	34	G13.1	18.7	-51.4231	862.609	-62.9376	87.0871	-25.177	2.28667	-45.2169	-2.91216	-2.42305
083119.17	2019-08-31	Iso #4	week 5	34	G13.1	14.5	-51.2626	815.994	-67.0619	83.5147	-26.3443	3.0275	-48.5649	-1.43021	-0.296539
083119.18	2019-08-31	Iso #4	week 5	34	G13.1	16.2	-49.5123	689.031	-64.3079	91.4533	-25.6653	2.98	-48.9319	-2.42958	-0.350474
083119.19	2019-08-31	Iso #4	week 5	34	G13.1	11.5	-54.212	776.198	-66.9102	102.412	-33.0098	1.89667	-53.5889	-1.45482	-1.12808
090119.11	2019-09-01	Iso #4	week 5	35	G13.1	17.9	-56.4216	606.458	-66.7338	100.507	-37.2416	1.22667	-54.2043	-3.2828	-1.58244
090119.12	2019-09-01	Iso #4	week 5	35	G13.1	18.9	-48.5991	1247.48	-66.6694	87.2433	-32.5775	1.64667	-50.5422	-5.23012	-2.75928
090119.13	2019-09-01	Iso #4	week 5	35	G13.1	16.2	-45.1559	642.44	-65.7423	96.326	-36.4532	1.34667	-52.5513	-4.06123	-2.93901
090119.15	2019-09-01	Iso #4	week 5	35	G13.1	18.1	-45.8113	1087.35	-66.1198	88.1535	-27.6271	1.68571	-49.7567	-7.65076	-1.78055
090119.16	2019-09-01	Iso #4	week 5	35	G13.1	15.3	-52.5888	611.26	-62.708	96.1451	-36.6821	1.28667	-58.8928
090119.17	2019-09-01	Iso #4	week 5	35	G13.1	14.2	-55.0579	575.303	-65.1526	97.2144	-37.323	1.272	-53.595	-8.17853	-3.01522
090119.18	2019-09-01	Iso #4	week 5	35	G13.1	17.3	-62.3601	490.507	-65.051	94.2441	-39.2578	1.3	-55.1392	-6.40876	-1.71923
090119.19	2019-09-01	Iso #4	week 5	35	G13.1	16.6	-56.6455	562.648	-65.5791	91.7815	-32.0435	2.008	-55.1941	-1.5881	-0.809931
101419.10	2019-10-14	Iso #4	week 5	33	G13.1b	13	-52.4797	851.55	-66.4684	96.1213	-26.4689	1.88	-52.6327	-4.2479	-1.82505
101419.7	2019-10-14	Iso #4	week 5	33	G13.1b	13.3	-47.3393	840.104	-65.1656	92.1248	-34.7351	2.016	-51.3245
101419.8	2019-10-14	Iso #4	week 5	33	G13.1b	11.7	-41.7582	753.083	-66.0025	96.9412	-31.7322	2.512	-47.9919
101419.9	2019-10-14	Iso #4	week 5	33	G13.1b	10.4	-46.821	845.784	-65.6475	100.468	-30.4108	2.165	-44.6854
101519.1	2019-10-15	Iso #4	week 5	34	G13.1b	13.8	-52.8342	1018.17	-67.0246	89.4245	-24.2462	5.6	-47.4701	-1.32441	-0.719516
101519.2	2019-10-15	Iso #4	week 5	34	G13.1b	14.4	-43.4065	792.847	-67.0197	90.5183	-30.2429	2.7	-44.6777	-3.84373	-1.099
101519.3	2019-10-15	Iso #4	week 5	34	G13.1b	17.1	-37.8603	1107.03	-66.1311	87.7477	-28.5187	2.43	-52.0223	-4.07679	-0.516528
101519.4	2019-10-15	Iso #4	week 5	34	G13.1b	17.4	-46.3937	1061.23	-68.727	83.528	-23.3765	7.1	-57.4341	-5.41959	-2.74002
101519.5	2019-10-15	Iso #4	week 5	34	G13.1b	13.4	-48.7815	789.43	-63.7916	89.4507	-33.9905	3.8	-51.77	-3.79429	-2.60834
