# Supplementary material for: Dyshomeostatic modulation of Ca2+-activated K+ channels in a human neuronal model of KCNQ2 encephalopathy
Source: eLife. 2021 Feb 5;10:e64434. doi: 10.7554/eLife.64434 (PMC7864629; doi:10.7554/eLife.64434)
Supplement: Figure 5—source data 1. [file elife-64434-fig5-data1.xlsx]

## Sheet: Figure 5 cclamp_Apamin_source d
										Baseline							Apamin							Delta
Neuron	Date	genotype	week in differentiation	day in differentiation	differentiation cohort	Bridge	RMP	Input resistance at RMP	Input resistance at -65mV	Vh baseline	sp Amp	sp Threshold	HW	fAHP	mAHP	sAHP	Drug Vh baseline	Drug sp Amp	Drug sp Threshold	Drug HW	Drug fAHP	Drug mAHP	Drug sAHP	Delta AP Amp	Delta threshold	Delta HW	Delta fAHP	Delta mAHP	Delta sAHP
111219.10	2019-11-12	Q2-04	week 4	23	G16.1	10.6	-50.5087	513.365	358.398	-65.8293	99.2054	-27.3234	1.42667	-56.2363	-3.73511	-3.41333	-65.9606	99.2197	-28.3661	1.35667	-56.3049	-1.94287	-1.13757	-0.0143497	-1.04268	-0.07	0.0686645	-1.79224	-2.27576
111219.3	2019-11-12	Q2-04	week 4	23	G16.1	14.4	-49.6537	696.964	729.72	-66.6129	101.7	-25.9094	3.3	-51.178	-7.83252	-6.24464	-66.9148	98.1465	-25.0916	3.464	-46.8933	-3.03969	-2.42857	3.554	0.817871	0.164	-4.28467	-4.79283	-3.81607
111219.6	2019-11-12	Q2-04	week 4	23	G16.1	15.9	-52.8173	1056.64	1050.45	-67.3667	91.651	-27.9312	3.42	-52.5894	-8.5274	-5.65084	-66.6964	87.8247	-28.2695	3.75333	-49.9166	-1.80034	-1.17625	3.82629	-0.338237	0.333333	-2.67283	-6.72706	-4.47459
111319.6	2019-11-13	Q2-04	week 4	24	G16.1	16	-57.491	587.736	540.25	-64.0159	87.5653	-23.8444	2.83333	-47.3124	-8.80079	-5.1031						-2.66099	-1.19875					-6.1398	-3.90435
111519.3	2019-11-15	Q2-04	week 4	26	G16.1	13.4	-46.6076	1041.56	961.61	-67.7891	98.7568	-25.8636	3.525	-46.608			-66.6487	88.9418	-23.8342	3.9	-45.7764			9.81508	2.02942	0.375	-0.831604
060520.6	2020-06-05	Q2-04	week 4	23	G16.1b	11.1	-52.0331	1110.01	945.881	-68.4394	82.9841	-27.4902	2.784	-49.4812	-7.41054	-3.88119						-2.96409	-1.35237					-4.44645	-2.52882
060820.2	2020-06-08	Q2-04	week 4	26	G16.1b	11.5	-54.2632	910.895	811.209						-12.3644	-2.68694						-2.52769	-0.896169					-9.83668	-1.79077
061520.3	2020-06-15	Q2-04	week 4	22	G14.1	9.9	-46.1494	490.177	340.251	-69.0662	85.7959	-31.4087	1.608	-50.6653	-4.39808	-2.30295	-66.6781	79.6379	-32.2673	1.37333	-49.4792	-1.97259	0	6.15803	-0.858561	-0.234667	-1.18612	-2.42549	-2.30295
061720.7	2020-06-17	Q2-04	week 4	24	G14.1	11.3	-50.2736	1165.56	812.319	-68.1766	95.7263	-33.3557	1.33	-55.8726	-6.51875	-5.6203	-69.0569	83.5477	-35.3038	1.49333	-57.0628	-2.27468	-0.6371	12.1786	-1.94804	0.163333	1.19019	-4.24407	-4.9832
061920.4	2020-06-19	Q2-04	week 4	26	G14.1	15.3	-50.066	1236.77	288.533	-68.1646	90.8888	-33.0544	1.4025	-53.4325	-4.59394	-2.94122	-66.466	81.5722	-38.2603	1.37143	-55.0624	-1.83	0	9.31663	-5.20597	-0.0310714	1.62997	-2.76394	-2.94122
111219.5	2019-11-12	Iso #4	week 4	23	G16.1	10.4	-47.3895	698.147	467.015	-66.7032	90.3035	-22.5321	2.73333	-46.7529	-3.59277	-1.06444	-65.963	87.2033	-22.0032	2.63	-45.9747	-2.606	-0.627337	3.10025	0.528971	-0.103333	-0.778198	-0.986774	-0.437102
111219.7	2019-11-12	Iso #4	week 4	23	G16.1	15.8	-61.0695	535.858	644.908	-66.2956	90.0841	-22.2626	3.36	-43.7469	-2.94733	-2.25543	-65.4003	88.0952	-21.0876	3.35333	-42.2465	-2.89148	-1.81412	1.9889	1.17493	-0.00666667	-1.50045	-0.055847	-0.441314
111319.8	2019-11-13	Iso #4	week 4	24	G16.1	11	-52.3363	493.793	404.222	-64.739	86.0533	-28.717	2.08857	-55.5899	-3.39286	-1.61082						-2.60183	-1.39685					-0.791028	-0.213968
111519.2	2019-11-15	Iso #4	week 4	26	G16.1	17	-51.0777	992.407	995.934	-66.8045	97.7188	-26.1536	2.61333	-44.1081	-4.32755	-3.26146	-68.0092	89.4402	-26.1917	3	-45.2499	-4.01457	-3.50317	8.27865	-0.038147	0.386667	1.14187	-0.312975	0.241709
060420.14	2020-06-04	Iso #4	week 4	22	G16.1b	10.9	-55.6085	409.952	286.078	-67.9455	96.6259	-29.3762	1.812	-61.3342	-1.78362	-0.483121	-65.1717	84.825	-27.3819	1.99	-60.0128	-1.33757	-0.201798	11.8009	1.99432	0.178	-1.32141	-0.446056	-0.281323
061520.8	2020-06-15	Iso #4	week 4	22	G14.1	9	-40.3407	798.288	579.283	-65.5239	83.3652	-29.3045	2.35	-44.3344	-4.10364	-1.53316	-68.9235	80.3574	-30.5379	2.14667	-46.2443	-3.65083	-1.44971	3.00778	-1.23342	-0.203333	1.90989	-0.452806	-0.0834454
061620.6	2020-06-16	Iso #4	week 4	23	G14.1	9.2	-53.5461	698.779	600.486	-66.2413	96.445	-36.4729	1.74	-55.3763	-6.10674	-4.3255	-64.8988	84.5444	-36.2473	1.38	-54.3213	-5.761	-3.02239	11.9005	0.225612	-0.36	-1.05504	-0.345743	-1.30311
061720.2	2020-06-17	Iso #4	week 4	24	G14.1	8.1	-54.9603	334.39	268.295	-65.5952	97.7251	-30.2582	1.26333	-54.8604	-8.315	-5.42095	-66.7677	92.8603	-31.1584	1.372	-54.5166	-6.935	-5.64932	4.86484	-0.900269	0.108667	-0.343831	-1.38	0.228362
061920.1	2020-06-19	Iso #4	week 4	26	G14.1	10.7	-44.6082	710.62	570.976	-66.5031	95.3727	-38.2996	1.13143	-61.07	-3.63863	-1.50819	-67.896	94.5465	-36.0674	1.1	-63.9823	-3.79	-1.46332	0.826175	2.23214	-0.0314286	2.91225	0.151369	-0.0448645
