# Supplementary material for: Dyshomeostatic modulation of Ca2+-activated K+ channels in a human neuronal model of KCNQ2 encephalopathy
Source: eLife. 2021 Feb 5;10:e64434. doi: 10.7554/eLife.64434 (PMC7864629; doi:10.7554/eLife.64434)
Supplement: Figure 5—source data 2. [file elife-64434-fig5-data2.xlsx]

## Sheet: Figure 5 PaxApa MEA source data
Cell type	Differentiation	plate	Baseline # of Spikes per Burst - Avg	10min drug # of Spikes per Burst - Avg	delta #spikes 10min	Baseline Burst Percentage - Avg	10min drug Burst Percentage - Avg	deltas burst % 10min	baseline ISI Coefficient of Variation - Avg	10min drug ISI Coefficient of Variation - Avg	delta ISI CoV 10min
Q2-04	D11.1	3	7.74048	4	-3.74048	10.28	1.96078	-8.31922	1.33338	0.9048	-0.428583
Q2-04	D11.1	3	10.2759	4.4	-5.87587	14.3742	3.51342	-10.8608	1.44376	1.19292	-0.250846
Q2-04	D11.1	3	8.39303	8.58228	0.189255	33.683	36.1647	2.4817	1.66457	2.17744	0.512871
Q2-04	D11.1	3	10.2841	6.37347	-3.91061	37.0448	18.0313	-19.0135	1.97615	1.45878	-0.517364
Q2-04	D11.1	3	11.8897	14.7733	2.88359	57.6445	26.1493	-31.4952	2.48845	1.76985	-0.718598
Q2-04	D11.1	3	9.09147	7.92702	-1.16445	32.7067	19.262	-13.4448	1.7679	1.54412	-0.223771
Iso #4	D11.1	3	6.89186	5.55238	-1.33948	12.2656	6.8937	-5.3719	1.44361	1.11356	-0.330054
Iso #4	D11.1	3	7.61485	0	-7.61485	21.5569	0	-21.5569	1.50557	1.04151	-0.464059
Iso #4	D11.1	3	7.39208	6.90417	-0.48791	23.5639	31.9104	8.34648	1.55837	2.1928	0.634432
Iso #4	D11.1	3	7.99101	6	-1.99101	23.0722	3.47368	-19.5986	1.6086	1.09284	-0.515764
Iso #4	D11.1	3	7.26597	5.11116	-2.15481	22.7618	12.2661	-10.4957	1.39845	1.30202	-0.09643
Iso #4	D11.1	3	10.1592	10.3438	0.184566	7.39145	14.9107	7.51927	1.37184	1.92111	0.549262
Q2-04	D11.1	4	11.4193	8.78027	-2.63907	21.4144	12.6979	-8.71644	1.72315	1.414	-0.30915
Q2-04	D11.1	4	15.7745	8.80557	-6.9689	33.3286	22.7389	-10.5898	2.07194	1.6667	-0.405246
Q2-04	D11.1	4	12.7438	6.70315	-6.04066	33.372	26.6285	-6.74349	1.80238	1.65082	-0.151564
Q2-04	D11.1	4	11.96	8.36853	-3.59151	42.102	34.4328	-7.66923	1.99749	2.28302	0.285536
Q2-04	D11.1	4	17.0819	13.1838	-3.89813	49.9244	40.8818	-9.04265	2.28267	2.01759	-0.26508
Q2-04	D11.1	4	12.9004	5.44444	-7.45593	33.6196	3.51537	-30.1042	1.98105	1.19447	-0.786578
Iso #4	D11.1	4	6.83472	6.46429	-0.370436	7.61988	12.6003	4.98044	1.07774	1.36845	0.290705
Iso #4	D11.1	4	8.63787	4	-4.63787	7.65494	10.5556	2.90062	1.18115	1.54506	0.363909
Iso #4	D11.1	4	9.91514	4.91667	-4.99847	26.1727	5.2405	-20.9322	1.64404	1.50947	-0.13457
Iso #4	D11.1	4	9.82055	7.72441	-2.09614	18.0456	28.826	10.7804	1.49632	1.76101	0.264686
Iso #4	D11.1	4	7.80764	9.03726	1.22962	7.23786	21.0799	13.8421	1.28098	1.94071	0.659728
Iso #4	D11.1	4	13.4228	8.66686	-4.75598	32.0094	6.328	-25.6814	1.68231	1.26767	-0.414645
Iso #4	D16.1	9	11.7667	8	-3.76667	7.13736	1.94444	-5.19292	1.2593	1.32086	0.061568
Iso #4	D16.1	9	7.57396	4	-3.57396	15.7026	2.5974	-13.1052	1.42445	1.01209	-0.41236
Iso #4	D16.1	9	10.2186	9.0381	-1.1805	23.9283	9.26362	-14.6647	1.66884	1.57172	-0.097116
Q2-04	D16.1	9	10.9008	5.16667	-5.73417	17.2196	7.28395	-9.93562	1.91857	1.87313	-0.045444
Q2-04	D16.1	9	11.0688	0	-11.0688	14.3084	0	-14.3084	1.74096	1.09976	-0.641199
Iso #4 XE991 chronic	D16.1	9	15.7708	13.1343	-2.63657	20.5767	14.1431	-6.43351	1.81441	2.04398	0.229568
Iso #4 XE991 chronic	D16.1	9	12.8409	6.51368	-6.32724	35.6375	17.5553	-18.0822	2.37901	1.57828	-0.800731
Iso #4 XE991 chronic	D16.1	9	10.2811	9.48535	-0.795775	20.7055	15.2729	-5.43263	2.01737	1.66824	-0.349134
Iso #4 XE991 chronic	D16.1	9	11.1325	8.08889	-3.04361	22.5854	13.4768	-9.10859	1.77655	1.62606	-0.150489
Iso #4	D16.1	10	9.96306	6.56667	-3.39639	13.1893	8.91	-4.27926	1.60983	1.30519	-0.304637
Iso #4	D16.1	10	9.04618	4.375	-4.67118	23.4571	9.63876	-13.8184	1.68437	1.52407	-0.160296
Iso #4	D16.1	10	10.2191	14.1667	3.94752	17.0312	20.6046	3.57342	1.4687	1.84899	0.380293
Iso #4	D16.1	10	5.21198	7.5	2.28802	7.97257	8.52273	0.550159	1.14658	1.31313	0.166555
Q2-04	D16.1	10	15.5241	6.99603	-8.52811	27.9425	16.9157	-11.0268	1.92025	1.37612	-0.544124
Q2-04	D16.1	10	18.9359	6.35265	-12.5833	43.8191	13.2647	-30.5544	2.57336	1.34001	-1.23335
Q2-04	D16.1	10	14.3631	11.3438	-3.0193	20.2535	16.361	-3.8925	1.84117	1.75835	-0.08282
Q2-04	D16.1	10	16.7563	5.75	-11.0063	27.6186	1.93657	-25.682	2.0776	1.06804	-1.00956
Iso #4 XE991 chronic	D16.1	10	30.5604	8.02883	-22.5316	54.5057	28.8054	-25.7003	3.19682	2.02598	-1.17084
Iso #4 XE991 chronic	D16.1	10	18.1412	8.55194	-9.58926	43.32	23.5968	-19.7232	2.71611	1.71717	-0.998936
Iso #4 XE991 chronic	D16.1	10	20.4717	9.125	-11.3467	39.4075	7.97872	-31.4288	2.98979	1.54438	-1.4454
Iso #4 XE991 chronic	D16.1	10	18.7303	11.0397	-7.69059	33.9198	31.778	-2.14178	2.316	2.00541	-0.310591
