# Supplementary material for: Dyshomeostatic modulation of Ca2+-activated K+ channels in a human neuronal model of KCNQ2 encephalopathy
Source: eLife. 2021 Feb 5;10:e64434. doi: 10.7554/eLife.64434 (PMC7864629; doi:10.7554/eLife.64434)
Supplement: Figure 6—figure supplement 2—source data 1. [file elife-64434-fig6-figsupp2-data1.xlsx]

## Sheet: SupFigure 6 MEA source data
Cell type	Differentiation	plate	Neuron count	D10 Weighted Mean Firing Rate (Hz)	D11 Weighted Mean Firing Rate (Hz)	D12 Weighted Mean Firing Rate (Hz)	D13 Weighted Mean Firing Rate (Hz)	D15 Weighted Mean Firing Rate (Hz)	D10 # of active electrodes	D11 # of active electrodes	D12 # of active electrodes	D13 # of active electrodes	D15 # of active electrodes	D10 Burst Percentage - Avg	D11 Burst Percentage - Avg	D12 Burst Percentage - Avg	D13 Burst Percentage - Avg	D15 Burst Percentage - Avg	Delta active electrodes d12_13	Delta weighted firing rate d12_13	Delta burst% d12_13
Iso #4	D16.1	9	232	0	0.040323	0.083889	0.287778	0.152105	0	1	6	15	19	0	0	0	2.46408	12.2128	9	0.203889	2.46408
Iso #4	D16.1	9	353	0	0.062903	0.154444	0.070556	0.14	0	5	3	6	7	0	0	3.57143	1.81818	1.05778	3	-0.083888	-1.75325
Iso #4	D16.1	9	302	0	0	0.16	0.119048	0.236222	0	0	2	7	15	0	0	0	7.73737	1.97331	5	-0.040952	7.73737
Iso #4	D16.1	9	289	0	0.185484	0.071667	0.226333	0.13087	0	1	4	10	23	0	0	0	6.11545	3.39182	6	0.154666	6.11545
Q2-04	D16.1	9	205	0.024194	0.054435	0.094211	0.176212	0.176556	1	8	19	22	30	0	0	2.4727	5.60331	17.2083	3	0.082001	3.13061
Q2-04	D16.1	9	191	0.072581	0.212903	0.065833	0.188485	0.171724	4	5	12	11	29	0	1.64349	0	1.66499	21.3038	-1	0.122652	1.66499
Q2-04	D16.1	9	235	0.043779	0.073201	0.080476	0.104833	0.12303	7	13	14	20	33	0	0.874126	7.57746	6.22738	13.1672	6	0.024357	-1.35007
Iso #4 XE chronic	D16.1	9	141	0	0.024194	0.356667	0.12037	0.105439	0	1	3	18	19	0	0	0.657277	15.3638	25.498	15	-0.236297	14.7065
Iso #4 XE chronic	D16.1	9	267	0	0.314516	0.18	0.112963	0.191579	0	1	1	18	19	0	0	0	20.2111	27.5843	17	-0.067037	20.2111
Iso #4 XE chronic	D16.1	9	231	0	0	0.256667	0.3625	0.175556	0	0	3	12	21	0	0	2.33476	21.8367	20.5334	9	0.105833	19.502
Iso #4 XE chronic	D16.1	9	238	0	0	0.211333	0.161333	0.226	0	0	5	25	25	0	0	0	35.6864	37.7659	20	-0.05	35.6864
Iso #4	D16.1	10	145	0	0.132231	0.113333	0.202857	0.167576	0	1	5	7	11	0	0	0	1.66076	8.42314	2	0.089524	1.66076
Iso #4	D16.1	10	225	0	0	0.072222	0.105714	0.161429	0	0	3	7	14	0	0	0	5.83977	7.04232	4	0.033492	5.83977
Iso #4	D16.1	10	280	0	0	0	0.023333	0.08125	0	0	0	1	8	0	0	0	0	0	1	0.023333	0
Iso #4	D16.1	10	232	0	0.049587	0.031667	0.082917	0.110513	0	1	2	8	13	0	0	0	3.76819	5.93847	6	0.05125	3.76819
Q2-04	D16.1	10	222	0.032787	0.126446	0.128519	0.08037	0.142	1	10	9	18	25	0	4.10256	5.25174	1.58249	11.9998	9	-0.048149	-3.66924
Q2-04	D16.1	10	181	0.180328	0.090909	0.125909	0.226333	0.248182	2	4	22	30	33	0	0	1.90769	9.75066	26.559	8	0.100424	7.84297
Q2-04	D16.1	10	226	0.040984	0.067952	0.151667	0.167619	0.232778	2	9	12	21	24	0	5.53846	3.84531	12.9173	12.7427	9	0.015952	9.072
Q2-04	D16.1	10	465	0	0	0.1425	0.316667	0.392716	0	0	4	7	27	0	0	0	1.97773	6.23072	3	0.174167	1.97773
Iso #4 XE chronic	D16.1	10	224	0	0.024793	0.033333	0.215397	0.262361	0	1	2	21	24	0	0	0	41.5014	38.1693	19	0.182064	41.5014
Iso #4 XE chronic	D16.1	10	238	0	0.14876	0.028333	0.262698	0.157536	0	1	2	21	23	0	0	0	30.384	25.347	19	0.234365	30.384
Iso #4 XE chronic	D16.1	10	229	0	0	0.095556	0.415362	0.23614	0	0	3	23	38	0	0	0	24.6641	37.6684	20	0.319806	24.6641
Iso #4 XE chronic	D16.1	10	270	0.02459	0.030992	0.122667	0.160769	0.258229	1	4	5	26	32	0	0	3.7518	34.0585	32.9124	21	0.038102	30.3067
Iso #4	D18.1	11	345	0.063361	0.093333	0.045417	0.090196	0.136154	9	1	8	17	13	6.929	0	4.51128	8.54414	1.88735	9	0.044779	4.03286
Iso #4	D18.1	11	280	0.194215	0.08	0.118	0.111905	0.101667	3	2	5	14	16	4.85529	0	1.28205	4.36724	6.49516	9	-0.006095	3.08519
Q2-04	D18.1	11	275	0.059504	0.074889	0.120526	0.168333	0.130202	15	15	19	26	33	14.1106	10.5822	11.0458	19.0684	19.6894	7	0.047807	8.02257
Q2-04	D18.1	11	288	0	0.057619	0.104103	0.108333	0.087778	0	7	13	18	21	0	5.06279	4.00362	11.1061	8.79169	5	0.00423	7.10244
Q2-04	D18.1	11	253	0.06405	0.082381	0.119487	0.116232	0.155867	4	7	13	23	25	0	17.2854	4.89583	5.89018	8.03943	10	-0.003255	0.994342
Q2-04	D18.1	11	289	0.165289	0.059167	0.158611	0.133939	0.151389	1	4	12	22	24	0	0	1.70276	13.0485	12.0572	10	-0.024672	11.3457
Iso #4 XE chronic	D18.1	11	349	0.074638	0.076	0.139487	0.197262	0.216389	32	20	13	28	24	8.05013	12.4653	9.78675	22.4301	23.8568	15	0.057775	12.6434
Iso #4 XE chronic	D18.1	11	325	0.059917	0.046667	0.124	0.357619	0.125965	20	11	5	7	19	4.79658	3.44522	4.44444	12.4746	9.83558	2	0.233619	8.03013
Iso #4	D18.1	12	389	0.020661	0.054444	0.061333	0.116154	0.142982	1	3	5	13	19	0	6.4	4.36816	1.91656	7.76956	8	0.054821	-2.4516
Iso #4	D18.1	12	299	0	0.183333	0.054444	0.2	0.069048	0	1	3	4	14	0	0	0	8.48265	3.8	1	0.145556	8.48265
Iso #4	D18.1	12	358	0.041322	0.161667	0.174667	0.092778	0.121818	1	2	5	12	11	0	4.09091	1.11111	2.00669	6.6155	7	-0.081889	0.895578
Iso #4	D18.1	12	293	0.035124	0.093333	0.30619	0.218788	0.162727	2	3	7	11	11	0	0	12.3917	12.9341	3.5019	4	-0.087402	0.542416
Q2-04	D18.1	12	297	0.073347	0.0425	0.080333	0.146167	0.199867	4	8	10	20	25	2.5974	6.67158	3.15789	11.8094	22.8703	10	0.065834	8.65155
Q2-04	D18.1	12	314	0.046832	0.086667	0.166042	0.19963	0.225287	3	7	16	27	29	0	7.33873	9.30443	14.1899	15.5151	11	0.033588	4.88546
Q2-04	D18.1	12	286	0.033058	0.056333	0.139524	0.118704	0.190115	4	10	14	18	29	0	3.83753	17.2757	9.15867	11.6785	4	-0.02082	-8.11701
Q2-04	D18.1	12	350	0.058678	0.087407	0.150625	0.168148	0.184194	5	9	16	18	31	7.8125	0.351185	11.1094	11.747	24.1547	2	0.017523	0.63763
Iso #4 XE chronic	D18.1	12	361	0.109504	0.079333	0.218889	0.157719	0.185079	2	5	3	19	21	10.1626	6.1828	1.69935	20.4836	20.9807	16	-0.06117	18.7842
Iso #4 XE chronic	D18.1	12	336	0	0.026667	0.157778	0.200351	0.156984	0	1	6	19	21	0	0	0	17.9102	24.3586	13	0.042573	17.9102
Iso #4 XE chronic	D18.1	12	288	0	0	0.06	0.061852	0.078974	0	0	1	9	13	0	0	0	10.5369	5.81374	8	0.001852	10.5369
Iso #4 XE chronic	D18.1	12	301	0.336777	0	0.054444	0.17359	0.238431	2	0	3	13	17	20.839	0	0	12.6039	10.9859	10	0.119146	12.6039
