# Supplementary material for: Dyshomeostatic modulation of Ca2+-activated K+ channels in a human neuronal model of KCNQ2 encephalopathy
Source: eLife. 2021 Feb 5;10:e64434. doi: 10.7554/eLife.64434 (PMC7864629; doi:10.7554/eLife.64434)
Supplement: Figure 6—source data 1. [file elife-64434-fig6-data1.xlsx]

## Sheet: Figure 6 cclamp_chronicXE_sourc
Neuron	Date	genotype	week in differentiation	day in differentiation	differentiation cohort	Bridge	RMP	Input resistance at RMP2	Column 35	Vh baseline	sp Amp	sp Threshold	HW	fAHP	mAHP	sAHP
062719.10	2019-06-27	Q2-04	week 4	25	G11.1	16	-42.0232	752.287		-65.6423	93.2099	-38.7065	2.11667	-53.2633	-6.90502	-4.26879
062719.11	2019-06-27	Q2-04	week 4	25	G11.1	20.4	-50.587	846.709		-67.6225	89.29	-32.8491	1.928	-52.3193	-3.09017	-1.61454
062719.12	2019-06-27	Q2-04	week 4	25	G11.1	12.8	-43.4569	1148.21		-65.68	98.5169	-29.3213	2.612	-48.3643	-6.17005	-4.46624
062719.13	2019-06-27	Q2-04	week 4	25	G11.1	12.5	-39.2176	501.314
062719.14	2019-06-27	Q2-04	week 4	25	G11.1	15.2	-38.2299	829.433		-64.5678
062719.15	2019-06-27	Q2-04	week 4	25	G11.1	12.4	-38.2694	785.7		-67.6782	100.53	-30.4565	3.73	-42.9993
062719.9	2019-06-27	Q2-04	week 4	25	G11.1	18.1	-44.16	626.771
071219.5	2019-07-12	Q2-04	week 4	23	G1.1	17.8	-53.5353	712.001		-66.2278	91.1148	-29.2358	3.09	-46.8445	-4.2756	-1.14272
071219.6	2019-07-12	Q2-04	week 4	23	G1.1	19.2	-45.1175	1022.26		-66.3383	91.3444	-31.5186	2.82	-51.825	-3.25426	-1.65243
071219.7	2019-07-12	Q2-04	week 4	23	G1.1	19.6	-49.3366	423.186		-65.6872	107.161	-29.0833	2.17	-55.0232	-5.82991	-2.55765
071219.8	2019-07-12	Q2-04	week 4	23	G1.1	15	-51.9212	222.623		-63.1968	95.7489	-39.9475	1.5	-52.1444	-3.36606	-2.18403
072319.11	2019-07-23	Q2-04	week 4	23	G12.1a	10.7	-50.9505	655.096		-65.1814	92.3879	-30.1158	1.96	-48.4695	-6.69456	0
072319.12	2019-07-23	Q2-04	week 4	23	G12.1a	9.8	-45.2791	813.588		-64.0801	86.8309	-27.3056	2.59	-47.89	-3.89787	-1.23953
072319.13	2019-07-23	Q2-04	week 4	23	G12.1a	11.1	-41.2962	1277.2		-68.0334	103.844	-28.4729	1.32571	-46.1382	-2.67166	-2.24873
072319.14	2019-07-23	Q2-04	week 4	23	G12.1a	11	-49.1686	1003.66		-67.1098	94.5095	-25.86	2.51667	-52.6784	-7.67092	-2.54014
072319.9	2019-07-23	Q2-04	week 4	23	G12.1a	15.3	-43.0108	691.053		-64.4789	81.1354	-30.7739	2.784	-44.67	-5.1685	-1.33796
080619.1	2019-08-06	Q2-04	week 4	24	G12.1b	20.7	-40.9117	368.418
080619.11	2019-08-06	Q2-04	week 4	24	G12.1b	19.4	-44.892	563.278		-67.1099	85.5654	-30.2963	2.85	-57.8918	-7.6487	-1.84742
080619.12	2019-08-06	Q2-04	week 4	24	G12.1b	15.8	-39.9975	974.164		-66.7901	84.0936	-26.6724	3.76	-44.92	-7.30887	-0.0658307
080619.2	2019-08-06	Q2-04	week 4	24	G12.1b	18.4	-58.7653	272.125		-63.3284	91.7097	-48.523	1.76	-59.3262	-5.37723	-1.35255
080619.3	2019-08-06	Q2-04	week 4	24	G12.1b	19.8	-63.3067	305.501		-65.3575	90.8092	-24.9634	2.72	-59.7534	-10.5109	-0.984782
080619.4	2019-08-06	Q2-04	week 4	24	G12.1b	20.9	-59.5637	814.601		-67.3737	96.1416	-29.5105	3.64667	-53.8432	-11.0339	-6.56846
080619.5	2019-08-06	Q2-04	week 4	24	G12.1b	14	-59.5604	836.347		-67.5697	103.751	-30.3162	2.156	-49.3225
080619.6	2019-08-06	Q2-04	week 4	24	G12.1b	15.9	-56.3493	875.934							-3.85191	-3.09393
080619.7	2019-08-06	Q2-04	week 4	24	G12.1b	14.2	-62.35	559.824		-66.6689	92.029	-29.3579	2.25	-55.6946	-8.3236	-1.11453
080619.8	2019-08-06	Q2-04	week 4	24	G12.1b	15	-37.4615	635.278
080619.9	2019-08-06	Q2-04	week 4	24	G12.1b	18.4	-40.381	892.556		-67.6459	89.2523	-24.6	3.26	-58.9905	-9.63094	-9.07037
080719.1	2019-08-07	Q2-04	week 4	25	G12.1b		-45.2591	1203.04
080719.10	2019-08-07	Q2-04	week 4	25	G12.1b	18.2	-53.2356	720.277		-65.7235	95.4598	-29.6143	2.032	-51.3977	-2.91707	-1.77592
080719.2	2019-08-07	Q2-04	week 4	25	G12.1b	18.4	-58.44	269.721		-64.2066	93.5035	-33.844	2.29333	-65.2568	-6.71471	-2.89161
080719.3	2019-08-07	Q2-04	week 4	25	G12.1b	15.8	-49.4698	1153.29							-5.98174	-2.54707
080719.4	2019-08-07	Q2-04	week 4	25	G12.1b	20.8	-49.9574	1051.99
080719.5	2019-08-07	Q2-04	week 4	25	G12.1b	16	-40.634	1414.7		-67.4798	92.6747	-29.8538	3.25	-51.6418	-4.84255	-3.27273
080719.6	2019-08-07	Q2-04	week 4	25	G12.1b	20.1	-59.7867	672.759		-66.635	88.5771	-51.4183	2.005	-55.2107	-9.54208	-2.79762
080719.7	2019-08-07	Q2-04	week 4	25	G12.1b	13.2	-44.1612	1250.81							-5.59619	-1.05168
080719.8	2019-08-07	Q2-04	week 4	25	G12.1b	13.2	-45.119	949.85							-7.56467	-6.96415
080719.9	2019-08-07	Q2-04	week 4	25	G12.1b		-58.2461	952.787
080819.11	2019-08-08	Q2-04	week 4	26	G12.1b	14.2	-39.8539	678.621		-65.2133	94.3332	-31.044	1.956	-53.3936	-4.63951	-0.893142
080819.12	2019-08-08	Q2-04	week 4	26	G12.1b	11.6	-50.3225	823.16		-65.9803	100.236	-26.7029	2.71	-50.5829	-1.71979	-1.07792
080819.13	2019-08-08	Q2-04	week 4	26	G12.1b	13.7	-39.5686	1191.26		-65.3441	88.6856	-29.6631	2.79714	-48.257	-5.23461	-1.5499
080819.14	2019-08-08	Q2-04	week 4	26	G12.1b	19.6	-47.0096	995.733
080819.15	2019-08-08	Q2-04	week 4	26	G12.1b	13.9	-43.5381	1570.95		-63.0642	89.1873	-25.8789	2.78	-49.6979	-10.0144	-9.38495
080819.16	2019-08-08	Q2-04	week 4	26	G12.1b	16.7	-49.4413	1236.73		-65.6934	93.5341	-35.396	2.12	-51.0428	-5.64558	-5.18223
080819.17	2019-08-08	Q2-04	week 4	26	G12.1b		-41.3244	1777.85							-5.58399	-1.30973
080819.18	2019-08-08	Q2-04	week 4	26	G12.1b	12.3	-49.5554	1199.69		-64.1879	86.9642	-28.0457	2.88667	-51.6154
080819.19	2019-08-08	Q2-04	week 4	26	G12.1b	12.8	-57.1927	454.007		-63.1356	98.5869	-36.0311	1.35333	-53.9754	-10.5792	-1.45733
080819.20	2019-08-08	Q2-04	week 4	26	G12.1b	12.5	-41.9837	1403.05		-66.4953	91.9104	-30.8105	3.188	-46.8567	-2.05684	-1.6808
080819.21	2019-08-08	Q2-04	week 4	26	G12.1b	18.4	-53.5861	548.486		-66.3953	87.2388	-23.5596	2.98571	-50.0096	-11.3406	-3.43056
082019.1	2019-08-20	Q2-04	week 4	23	G13.1	16.2	-53.184	1197.77							-4.5276	-4.39593
082019.10	2019-08-20	Q2-04	week 4	23	G13.1	14.8	-38.8156	1028.34		-65.542	100.363	-31.8705	3.49333	-54.3315	-10.0993	-2.61728
082019.2	2019-08-20	Q2-04	week 4	23	G13.1	14.2	-44.8645	1194.99
082019.3	2019-08-20	Q2-04	week 4	23	G13.1		-38.6163	1247.18		-65.7966	94.6611	-30.0649	3.32667	-53.4465	-6.5592	-5.94165
082019.4	2019-08-20	Q2-04	week 4	23	G13.1	16.8	-42.5898	910.827		-66.2871	96.4588	-28.8595	2.54667	-51.6256	-5.14254	-3.10735
082019.5	2019-08-20	Q2-04	week 4	23	G13.1		-40.511	1151.15
082019.6	2019-08-20	Q2-04	week 4	23	G13.1	19.4	-37.7472	1116.13							-3.19512	-3.72409
082019.7	2019-08-20	Q2-04	week 4	23	G13.1	12.3	-42.3919	980.334		-67.3371	101.593	-31.9443	3.825	-51.3153	-3.36622	-2.73001
082019.8	2019-08-20	Q2-04	week 4	23	G13.1	13.3	-59.3255	968.086		-67.5012	88.4286	-28.4653	3.09	-45.0806	-4.27751	-4.07159
082019.9	2019-08-20	Q2-04	week 4	23	G13.1	16.3	-54.6787	1352.98		-64.4112	90.059	-36.0238	3.07143	-53.0047	-3.64875	-1.51127
082119.1	2019-08-21	Q2-04	week 4	24	G13.1	15.6	-47.4047	1251.59		-67.3131	95.3028	-29.8411	2.14	-51.8545	-9.74796	-7.13967
082119.10	2019-08-21	Q2-04	week 4	24	G13.1	15.3	-50.7577	920.506		-64.5328	101.966	-32.8796	1.432	-54.3701	-8.82167	-5.32381
082119.2	2019-08-21	Q2-04	week 4	24	G13.1	12.3	-52.63	947.305		-66.9288	101.859	-33.5999	1.736	-52.8015	-5.8796	-3.39256
082119.4	2019-08-21	Q2-04	week 4	24	G13.1	14.8	-37.9343	1255.26
082119.6	2019-08-21	Q2-04	week 4	24	G13.1	14.1	-45.1503	1207.56		-67.7613	93.6504	-27.0182	2.68	-51.0661	-6.14803	-4.36748
082119.7	2019-08-21	Q2-04	week 4	24	G13.1	16.4	-43.887	1026.11		-68.3947	94.2329	-33.4066	3.28667	-54.0059	-8.82249	-7.1426
082119.8	2019-08-21	Q2-04	week 4	24	G13.1	15.8	-44.5042	1242.04		-68.1611	91.4826	-23.4802	5.52	-48.7183	-3.61445	-1.4001
082119.9	2019-08-21	Q2-04	week 4	24	G13.1	16.7	-45.6466	1016.65		-67.1221	85.1504	-32.9514	3.13	-50.7202	-6.62216	-2.28831
082219.11	2019-08-22	Q2-04	week 4	25	G13.1	16.4	-41.0333	820.767							-4.65878	-1.24418
082219.12	2019-08-22	Q2-04	week 4	25	G13.1	15.3	-50.1594	617.947		-65.2295	89.6944	-29.5308	1.90667	-54.0975	-3.93952	-1.48561
082219.13	2019-08-22	Q2-04	week 4	25	G13.1	14.1	-41.5082	747.177		-67.6334	87.8666	-30.5684	2.62	-46.5698	-6.09634	-5.11383
082219.14	2019-08-22	Q2-04	week 4	25	G13.1	19	-53.403	406.789
082219.15	2019-08-22	Q2-04	week 4	25	G13.1	17.1	-50.3877	771.465		-67.4924	93.8962	-34.5581	2.52	-51.8921
082219.16	2019-08-22	Q2-04	week 4	25	G13.1	17.2	-42.2324	1228.3		-66.3627	90.1664	-31.1454	2.20286	-52.3943	-4.82113	-3.91763
082219.17	2019-08-22	Q2-04	week 4	25	G13.1	16.4	-45.133	919.426		-66.3627	89.9121	-33.2438	2.54	-52.1342	-8.40182	-4.19351
082219.18	2019-08-22	Q2-04	week 4	25	G13.1	13	-46.5217	867.747		-66.869	97.0051	-34.1746	2.05	-57.9834	-6.50047	-5.10715
082219.19	2019-08-22	Q2-04	week 4	25	G13.1	19	-49.864	1030.75		-67.072	92.9509	-34.3323	2.09333	-55.4962	-4.97575	-3.73811
082319.7	2019-08-23	Q2-04	week 4	26	G13.1	16.1	-50.3262	646.081		-62.4562	80.071	-32.0374	0.848	-54.9988
082319.8	2019-08-23	Q2-04	week 4	26	G13.1	12	-38.7016	703.305		-64.892	83.4772	-27.2217	1.35333	-46.2646	-1.84965	-1.10293
082319.9	2019-08-23	Q2-04	week 4	26	G13.1	13.1	-39.9819	504.285
100719.10	2019-10-07	Q2-04	week 4	26	G13.1	14.8	-38.3633	973.632							-12.2591	-3.36943
100719.11	2019-10-07	Q2-04	week 4	26	G13.1	12.8	-37.494	564.558		-65.6899	93.171	-30.6956	2.07667	-53.2735	-5.86761	-3.00192
100719.12	2019-10-07	Q2-04	week 4	26	G13.1	11.8	-37.6999	410.742		-61.9101	87.6262	-26.8606	2.26333	-47.6329	-5.1248	-0.0157681
100719.13	2019-10-07	Q2-04	week 4	26	G13.1	9.8	-49.8785	775.248		-66.8417	95.3878	-27.4048	2.544	-53.6133	-3.753	-2.32103
100719.14	2019-10-07	Q2-04	week 4	26	G13.1	12.3	-53.7951	532.264		-66.5812	95.5017	-28.7984	2.29333	-47.0479	-3.57198	-2.46167
100719.15	2019-10-07	Q2-04	week 4	26	G13.1	9.2	-59.1264	771.802		-65.7571	94.8251	-26.2909	2.59	-51.3306
100719.17	2019-10-07	Q2-04	week 4	26	G13.1	7.9	-37.4169	267.759							-3.47024	-2.81766
100719.18	2019-10-07	Q2-04	week 4	26	G13.1	11.2	-51.3644	882.464
100719.19	2019-10-07	Q2-04	week 4	26	G13.1	12.2	-43.8939	1157.38		-66.6265	88.9654	-28.3432	3.265	-42.6025	-6.62399	-3.50877
100719.20	2019-10-07	Q2-04	week 4	26	G13.1	10.6	-44.0151	910.263							-4.43285	-2.69924
100719.9	2019-10-07	Q2-04	week 4	26	G13.1	19	-58.2678	636.919		-63.5638	87.7133	-31.3619	2.72	-47.3735	-8.18507	-2.97656
100819.10	2019-10-08	Q2-04	week 4	22	G11.1	11.2	-45.7093	763.928		-66.0089	91.4147	-23.0408	3.36	-46.402	-7.10418	-1.67769
100819.11	2019-10-08	Q2-04	week 4	22	G11.1	13.9	-60.5089	559.776
100819.12	2019-10-08	Q2-04	week 4	22	G11.1	11.1	-47.6449	1164.18		-63.5222	83.4705	-23.0611	3.84	-43.7012
100819.13	2019-10-08	Q2-04	week 4	22	G11.1	14.4	-42.5768	766.661							-3.19173	-2.46095
100819.14	2019-10-08	Q2-04	week 4	22	G11.1	15	-41.4434	1979.17							-4.60867	-2.66259
100819.9	2019-10-08	Q2-04	week 4	22	G11.1	12.1	-42.2493	602.473
101019.10	2019-10-10	Q2-04	week 4	24	G11.1	12.1	-45.1503	877.26		-66.6095	92.9461	-28.3432	2.92	-48.1567	-7.53998	-4.06149
101019.11	2019-10-10	Q2-04	week 4	24	G11.1	12.2	-51.4528	590.252
101019.12	2019-10-10	Q2-04	week 4	24	G11.1	12.2	-43.0913	881.111							-10.0462	-4.3378
111119.1	2019-11-11	Q2-04	week 4	22	G16.1	13.1	-53.1051	673.965		-68.0766	98.3907	-26.886	2.76667	-49.374
111119.2	2019-11-11	Q2-04	week 4	22	G16.1	9.3	-54.9496	834.31
111119.4	2019-11-11	Q2-04	week 4	22	G16.1	10.4	-41.5903	720.547							-3.42236	-2.31866
111119.5	2019-11-11	Q2-04	week 4	22	G16.1	17.2	-52.292	847.645
111219.1	2019-11-12	Q2-04	week 4	23	G16.1	12.3	-42.8144	1075.67		-65.3203	89.7852	-24.9227	3.11333	-49.3164
111219.10	2019-11-12	Q2-04	week 4	23	G16.1	10.6	-50.5087	513.365		-65.8293	99.2054	-27.3234	1.42667	-56.2363	-3.73511	-3.41333
111219.2	2019-11-12	Q2-04	week 4	23	G16.1	11.9	-44.2245	605.614		-68.3585	88.1645	-48.5636	2.64667	-52.1545
111219.3	2019-11-12	Q2-04	week 4	23	G16.1	14.4	-49.6537	696.964		-66.6129	101.7	-25.9094	3.3	-51.178	-7.83252	-6.24464
111219.6	2019-11-12	Q2-04	week 4	23	G16.1	15.9	-52.8173	1056.64		-67.3667	91.651	-27.9312	3.42	-52.5894	-8.5274	-5.65084
111219.8	2019-11-12	Q2-04	week 4	23	G16.1	14	-52.8624	823.899
111219.9	2019-11-12	Q2-04	week 4	23	G16.1	11.4	-51.5297	888.343
111319.10	2019-11-13	Q2-04	week 4	24	G16.1	12.2	-43.4706	1015.36		-64.9775	103.529	-30.5786	2.235	-51.8875
111319.11	2019-11-13	Q2-04	week 4	24	G16.1	11.1	-52.9217	667.952		-66.4634	102.753	-31.9939	1.4325	-62.233
111319.12	2019-11-13	Q2-04	week 4	24	G16.1	12.4	-47.1098	1072.97
111319.13	2019-11-13	Q2-04	week 4	24	G16.1	12.8	-63.8277	356.019
111319.3	2019-11-13	Q2-04	week 4	24	G16.1	15.1	-39.3666	865.334
111319.4	2019-11-13	Q2-04	week 4	24	G16.1	16	-50.6194	557.667		-63.7985	98.2834	-27.1606	2.2	-53.9734	-2.87195	-1.15036
111319.5	2019-11-13	Q2-04	week 4	24	G16.1	12.8	-37.9854	673.9
111319.6	2019-11-13	Q2-04	week 4	24	G16.1	16	-57.491	587.736		-64.0159	87.5653	-23.8444	2.83333	-47.3124	-8.80079	-5.1031
111519.1	2019-11-15	Q2-04	week 4	26	G16.1	17	-57.1524	770.148		-65.1815	101.238	-30.6091	1.52	-62.4288	-4.01071	-1.71751
111519.3	2019-11-15	Q2-04	week 4	26	G16.1	13.4	-46.6076	1041.56		-67.7891	98.7568	-25.8636	3.525	-46.608
060520.1	2020-06-05	Q2-04	week 4	23	G16.1	10.1	-46.9867	722.557							-5.60376	0
060520.2	2020-06-05	Q2-04	week 4	23	G16.1	9.3	-58.3378	595.951		-62.5947	90.5641	-29.3808	1.665	-50.293
060520.3	2020-06-05	Q2-04	week 4	23	G16.1	9.7	-50.0811	651.192
060520.4	2020-06-05	Q2-04	week 4	23	G16.1	9.6	-40.9736	874.115		-67.289	98.7831	-26.6317	1.59333	-56.9051	-6.36229	-3.62171
060520.5	2020-06-05	Q2-04	week 4	23	G16.1	10.4	-44.6602	718.885		-66.5797	89.0363	-32.7018	1.22857	-60.5512	-3.05535	-1.856
060520.6	2020-06-05	Q2-04	week 4	23	G16.1	11.1	-52.0331	1110.01		-68.4394	82.9841	-27.4902	2.784	-49.4812	-7.41054	-3.88119
060820.1	2020-06-08	Q2-04	week 4	26	G16.1	11.2	-37.9664	774.65							-6.44371	0
060820.2	2020-06-08	Q2-04	week 4	26	G16.1	11.5	-54.2632	910.895							-12.3644	-2.68694
061520.1	2020-06-15	Q2-04	week 4	22	G14.1	12	-38.095	1037.91							-10.2523	-3.9051
061520.2	2020-06-15	Q2-04	week 4	22	G14.1	10.2	-37.1992	407.704							-5.76744	-1.27759
061520.3	2020-06-15	Q2-04	week 4	22	G14.1	9.9	-46.1494	490.177		-69.0662	85.7959	-31.4087	1.608	-50.6653	-4.39808	-2.30295
061620.8	2020-06-16	Q2-04	week 4	23	G14.1	10.9	-40.1654	459.51		-64.0885	86.2646	-30.8024	1.34333	-56.1676	-6.77114	-3.20173
061720.3	2020-06-17	Q2-04	week 4	24	G14.1	9.3	-40.7085	836.148		-65.7544	80.0214	-31.7434	2.51667	-48.9705	-4.11258	-2.36726
061720.4	2020-06-17	Q2-04	week 4	24	G14.1	9.4	-39.5253	863.033							-3.86322	-2.34357
061720.5	2020-06-17	Q2-04	week 4	24	G14.1	9.3	-42.688	915.151		-67.7521	80.1728	-35.2885	2.27667	-49.7538
061720.7	2020-06-17	Q2-04	week 4	24	G14.1	11.3	-50.2736	1165.56		-68.1766	95.7263	-33.3557	1.33	-55.8726	-6.51875	-5.6203
061920.2	2020-06-19	Q2-04	week 4	26	G14.1	10.7	-47.3715	728.701		-67.2095	88.4447	-35.553	1.61667	-56.2998	-4.62552	-1.0208
061920.4	2020-06-19	Q2-04	week 4	26	G14.1	15.3	-50.066	602.356		-68.1646	90.8888	-33.0544	1.4025	-53.4325	-4.59394	-2.94122
062719.1	2019-06-27	Iso #4	week 4	25	G11.1	12.1	-42.5656	364.891		-66.9609	98.689	-32.7861	1.82	-49.6114
062719.17	2019-06-27	Iso #4	week 4	25	G11.1	16.9	-37.7856	1413.98		-65.8784	82.8985	-28.6604	3.44857	-46.9404	-4.45501	-3.94597
062719.18	2019-06-27	Iso #4	week 4	25	G11.1	15.3	-41.9481	739.309		-65.4262	101.096	-33.5032	2.45333	-54.1178	-5.32945	-3.13813
062719.2	2019-06-27	Iso #4	week 4	25	G11.1	12.4	-41.23	731.066		-67.6358	98.9468	-29.6814	1.904	-58.2397	-4.74737	-2.99954
062719.3	2019-06-27	Iso #4	week 4	25	G11.1	14.7	-42.3	1583.8		-67.1957	88.6757	-31.5465	2.70857	-47.8864	-3.18005	-1.39246
062719.4	2019-06-27	Iso #4	week 4	25	G11.1	20.2	-46.2888	1236.77		-67.3346	98.7067	-29.4364	1.93143	-51.8886	-5.1405	-3.41809
062719.5	2019-06-27	Iso #4	week 4	25	G11.1	15	-38.77	452.832		-66.6506	92.737	-33.1238	1.556	-50.0671
062719.6	2019-06-27	Iso #4	week 4	25	G11.1	12.5	-47.9112	1088.7		-66.3157	86.7843	-38.9361	2.20286	-47.4679	-3.51833	-3.16849
062719.8	2019-06-27	Iso #4	week 4	25	G11.1	16.5	-43.9204	1173.22		-69.0112	93.277	-38.5045	2.75143	-49.9311	-3.8004	-3.63362
071219.1	2019-07-12	Iso #4	week 4	23	G1.1	16.2	-56.3674	553.947		-65.3427	94.5328	-31.1432	2.12	-56.7474	-3.39221	-1.16828
071219.2	2019-07-12	Iso #4	week 4	23	G1.1	14.2	-43.0985	1442.74		-67.5872	102.748	-30.8838	2.10857	-48.5404	-4.73131	-3.48977
071219.4	2019-07-12	Iso #4	week 4	23	G1.1	14.3	-54.0264	443.508		-66.1201	91.645	-31.7139	2.268	-58.4167	-8.68504	-2.68788
072319.1	2019-07-23	Iso #4	week 4	23	G12.1a	15.3	-49.6457	643.314
072319.2	2019-07-23	Iso #4	week 4	23	G12.1a	10.6	-41.4504	793.977		-68.2519	105.349	-32.5684	1.572	-47.6379	-3.60012	-3.9913
072319.3	2019-07-23	Iso #4	week 4	23	G12.1a	11.5	-48.1298	719.364		-66.8567	89.4885	-30.9143	2.28	-50.1892	-5.41886	-0.657993
072319.4	2019-07-23	Iso #4	week 4	23	G12.1a	12.6	-42.9706	1073.05		-68.9798	87.6077	-21.3928	4.32	-41.9617	-6.07554	-3.72354
072319.5	2019-07-23	Iso #4	week 4	23	G12.1a	13	-41.58	594.649		-66.5423	86.5191	-27.2888	2.256	-50.2075	-3.148	-1.90973
072319.6	2019-07-23	Iso #4	week 4	23	G12.1a	13.6	-43.6931	1262.99		-66.227	80.9844	-23.3983	3.94	-42.9949	-3.09657	-2.36415
072319.7	2019-07-23	Iso #4	week 4	23	G12.1a	15.8	-42.45	779.447		-64.9455					-3.12419	-1.89701
072419.1	2019-07-24	Iso #4	week 4	24	G12.1a	10.7	-56.1537	489.498		-67.2986	102.913	-29.8767	1.40667	-54.5247	-4.0789	-0.733063
072419.2	2019-07-24	Iso #4	week 4	24	G12.1a	11.2	-46.1	744.21		-66.032	85.0994	-29.4373	1.78	-49.4446	-4.44347	-0.895761
072419.3	2019-07-24	Iso #4	week 4	24	G12.1a	11.5	-41.4874	992.792		-68.1412	84.3765	-35.0037	2.8	-55.5725	-2.7443	0
072419.5	2019-07-24	Iso #4	week 4	24	G12.1a	10.4	-47.136	293.82
080619.13	2019-08-06	Iso #4	week 4	24	G12.1b	16.6	-38.9444	945.04							-2.18173	-0.887041
080619.14	2019-08-06	Iso #4	week 4	24	G12.1b	19.4	-46.4842	976.159		-64.6024	85.8304	-28.0273	2.516	-47.4243	-1.75802	-0.0351689
080619.15	2019-08-06	Iso #4	week 4	24	G12.1b	12.6	-47.5231	410.423
080619.16	2019-08-06	Iso #4	week 4	24	G12.1b	17.2	-38.74	763.757		-69.0782	87.938	-32.1808	2.56	-50.6134	-1.85593	-0.408187
080619.17	2019-08-06	Iso #4	week 4	24	G12.1b	18.7	-37.9375	1512.31		-67.1549	82.671	-33.1247	2.66	-41.8178
080619.18	2019-08-06	Iso #4	week 4	24	G12.1b	17.2	-54.1641	682.098		-67.4711	95.1323	-30.2795	1.676	-55.0659
080619.19	2019-08-06	Iso #4	week 4	24	G12.1b	13.2	-57.9025	599.23		-64.6513	103.482	-33.6304	1.432	-56.4758	-3.1598	-1.71317
080619.20	2019-08-06	Iso #4	week 4	24	G12.1b	14.3	-43.1224	372.965		-66.9117	89.3726	-33.2184	1.7	-63.8733	-5.23472	-0.736956
080619.22	2019-08-06	Iso #4	week 4	24	G12.1b	18.9	-41.0108	1472.21		-66.8065	86.5732	-27.553	3.08286	-42.9121	-3.88676	-0.570169
080619.23	2019-08-06	Iso #4	week 4	24	G12.1b	18.6	-52.05	1304.52		-63.6582	80.9704	-29.3318	2.97429	-47.8603	-4.646	-1.71249
080619.24	2019-08-06	Iso #4	week 4	24	G12.1b	16.4	-54.8788	1021.93		-67.373	95.9425	-32.0028	1.53333	-46.5953	-1.83023	-1.67555
080619.25	2019-08-06	Iso #4	week 4	24	G12.1b	15.9	-38.2286	224.654		-66.4476	92.0824	-35.22	1.46	-52.3987	-1.51878	-0.363173
080719.11	2019-08-07	Iso #4	week 4	25	G12.1b	15.3	-38.82	1062.74							-1.60558	0
080719.13	2019-08-07	Iso #4	week 4	25	G12.1b	14	-49.5748	883.272
080719.14	2019-08-07	Iso #4	week 4	25	G12.1b	14.2	-44.1817	1173.61		-66.5443	102.077	-31.5755	1.69333	-49.413	-1.40235	-0.585774
080719.15	2019-08-07	Iso #4	week 4	25	G12.1b	16.9	-48.8058	1234.93		-66.1135	91.3166	-30.9535	2.03429	-46.7573	-2.08353	-1.3938
080719.17	2019-08-07	Iso #4	week 4	25	G12.1b	16.2	-42.8127	1206.34		-66.2818	95.9449	-30.2342	2.19429	-52.0499	-3.74086	-0.982786
080719.18	2019-08-07	Iso #4	week 4	25	G12.1b	17.6	-42.1	560.989		-65.0627	88.6833	-30.0293	1.76667	-55.4301	-5.86905	-1.44827
080719.19	2019-08-07	Iso #4	week 4	25	G12.1b		-48.6434	624.142		-68.1782	89.3421	-27.6794	3.32	-53.2684	-7.91371	-2.79442
080719.20	2019-08-07	Iso #4	week 4	25	G12.1b	16.2	-43.5407	982.103		-66.2621	80.5596	-32.692	3.655	-44.075	-3.66736	-2.4296
080819.1	2019-08-08	Iso #4	week 4	26	G12.1b	17	-54.6574	740.048
080819.10	2019-08-08	Iso #4	week 4	26	G12.1b	15.2	-51.6792	670.725		-67.5273	86.8537	-35.5268	1.86857	-54.0946	-9.18338	-4.20809
080819.2	2019-08-08	Iso #4	week 4	26	G12.1b	18.1	-54.127	1625.9		-63.1234	81.8816	-32.1859	3.74	-48.3805	-3.85886	-1.89337
080819.3	2019-08-08	Iso #4	week 4	26	G12.1b	17.8	-44.4231	1433.9		-66.1663	91.9283	-22.6237	3.9	-39.2405	-1.70339	-0.165488
080819.4	2019-08-08	Iso #4	week 4	26	G12.1b	16.5	-46.381	976.601		-66.0165	86.209	-38.9048	3.89333	-45.6085	-6.19501	-4.25992
080819.5	2019-08-08	Iso #4	week 4	26	G12.1b	17.3	-49.5651	985.675		-65.6327	95.5018	-31.3644	1.86	-58.6014	-8.19726	-2.79514
080819.7	2019-08-08	Iso #4	week 4	26	G12.1b	16.5	-48.2586	802.915		-65.4397	99.3387	-31.4636	1.536	-51.2268	-4.56231	-2.6165
080819.8	2019-08-08	Iso #4	week 4	26	G12.1b	18.6	-43.1442	1486.65		-65.3598	82.1445	-34.6985	7.66	-32.8369	-3.0229	-0.758123
080819.9	2019-08-08	Iso #4	week 4	26	G12.1b	16.4	-53.3205	802.892		-66.1585	89.2167	-24.5928	3.01714	-47.8734	-1.5961	0
081919.2	2019-08-19	Iso #4	week 4	22	G13.1	16.2	-44.9238	1574.12							-1.73967	-0.536763
081919.3	2019-08-19	Iso #4	week 4	22	G13.1	17.3	-46.1287	424.809
081919.4	2019-08-19	Iso #4	week 4	22	G13.1	16.4	-45.5651	605.607							-4.31521	-4.00073
081919.7	2019-08-19	Iso #4	week 4	22	G13.1	13.2	-49.3425	1475							-2.47882	-2.05028
082019.12	2019-08-20	Iso #4	week 4	23	G13.1	13.4	-40.4735	919.377		-66.3799	89.2864	-29.4067	2.624	-47.7356	-2.97071	-2.64215
082019.13	2019-08-20	Iso #4	week 4	23	G13.1	13.4	-47.972	673.591
082019.14	2019-08-20	Iso #4	week 4	23	G13.1	17.5	-41.0764	650.988		-67.3708	83.9723	-36.1176	3.58	-45.8984	-4.07226	-2.03725
082019.15	2019-08-20	Iso #4	week 4	23	G13.1	13.1	-53.1324	610.897		-67.7933	96.1517	-32.6538	2.96	-54.184	-3.23603	-1.89455
082019.16	2019-08-20	Iso #4	week 4	23	G13.1	10.1	-45.4972	737.902		-66.3292	81.6185	-33.7524	2.12	-53.894
082019.18	2019-08-20	Iso #4	week 4	23	G13.1	10.3	-48.6668	653.798		-65.576	103.036	-32.0994	1.44	-60.7859	-8.13173	-1.03881
082019.19	2019-08-20	Iso #4	week 4	23	G13.1	15.8	-48.5115	933.81		-67.4372	95.488	-37.557	1.96	-54.3823	-4.47559	-3.98588
082019.20	2019-08-20	Iso #4	week 4	23	G13.1	15.6	-48.8085	1170.19		-67.721	91.8647	-34.5023	1.87143	-52.8564	-4.19129	-3.79883
082119.11	2019-08-21	Iso #4	week 4	24	G13.1	13.1	-37.383	1289.39		-65.5356	84.0231	-31.5125	2.86	-43.4448
082119.12	2019-08-21	Iso #4	week 4	24	G13.1	16.7	-41.4707	1174.55		-65.9474	96.3167	-32.789	1.71143	-50.7769	-2.12277	-1.56765
082119.13	2019-08-21	Iso #4	week 4	24	G13.1	16.9	-41.0071	1483.63
082119.14	2019-08-21	Iso #4	week 4	24	G13.1	15.3	-38.2942	687.729
082119.16	2019-08-21	Iso #4	week 4	24	G13.1	17	-49.644	893.385		-66.4426	83.7068	-32.9546	2.42571	-48.8804	-1.84225	-0.609864
082119.17	2019-08-21	Iso #4	week 4	24	G13.1	13	-44.8176	1033.63		-66.2263	82.8583	-25.3296	4.98	-41.3513
082119.18	2019-08-21	Iso #4	week 4	24	G13.1	16.7	-48.6079	1126.74		-64.7973	93.8064	-31.3198	3.72	-49.142	-5.25886	-1.10539
082119.19	2019-08-21	Iso #4	week 4	24	G13.1	14	-57.7064	339.258		-64.1031	88.7257	-32.7606	2.15667	-56.6711	-5.986	-0.822058
082119.20	2019-08-21	Iso #4	week 4	24	G13.1	16.5	-45.1883	797.681		-62.9029	89.8673	-35.7797	1.56571	-54.9883	-2.97752	-1.68761
082119.21	2019-08-21	Iso #4	week 4	24	G13.1	16.5	-45.3532	1061.22		-64.181	101.539	-29.1225	1.66857	-48.584	-1.96183	-1.73907
082119.22	2019-08-21	Iso #4	week 4	24	G13.1	14.2	-48.3336	863.36		-67.1508	94.3496	-27.2903	2.42	-46.3181	-2.69728	-2.33755
082219.1	2019-08-22	Iso #4	week 4	25	G13.1	16.8	-43.1638	757.559							-3.64774	-2.45108
082219.10	2019-08-22	Iso #4	week 4	25	G13.1	10.5	-56.0235	724.294		-67.026	103.199	-32.1299	2.05333	-51.9511	-6.48716	-2.84479
082219.2	2019-08-22	Iso #4	week 4	25	G13.1	16.1	-40.4598	1269.8							-7.59372	-3.2519
082219.3	2019-08-22	Iso #4	week 4	25	G13.1	19.3	-44.9167	903.02		-68.1437	89.8173	-35.2478	2.312	-57.3242	-8.44953	-4.19464
082219.5	2019-08-22	Iso #4	week 4	25	G13.1	15.6	-48.0522	571.601		-63.963	90.0326	-38.9938	6.195	-40.3366	-3.08979	0
082219.6	2019-08-22	Iso #4	week 4	25	G13.1	17.4	-38.3471	1546.79							-1.83117	-0.810551
082219.7	2019-08-22	Iso #4	week 4	25	G13.1	16.7	-42.494	1044.64		-64.1047	91.7027	-33.0149	1.65	-51.7985
082219.8	2019-08-22	Iso #4	week 4	25	G13.1	12.8	-46.9142	738.831		-65.5388	96.9262	-30.2277	3.3	-51.8494	-0.898578	-0.245641
082219.9	2019-08-22	Iso #4	week 4	25	G13.1	15.6	-53.5159	763.415		-66.6844	98.026	-30.5227	2.10333	-51.7883	-10.4926	-3.17141
082319.1	2019-08-23	Iso #4	week 4	26	G13.1	18.7	-45.9494	1150.94		-65.9724	82.8843	-32.9336	2.60333	-52.3376	-5.34946	-0.178858
082319.2	2019-08-23	Iso #4	week 4	26	G13.1	17.9	-42.4664	456.847		-63.0885	81.5923	-34.495	2.20667	-49.6826	-2.15062	-1.15371
082319.3	2019-08-23	Iso #4	week 4	26	G13.1	17.4	-38.2293	731.187
082319.4	2019-08-23	Iso #4	week 4	26	G13.1	19.2	-43.5971	243.795
082319.5	2019-08-23	Iso #4	week 4	26	G13.1	18.1	-47.8439	795.777		-63.9546	89.091	-37.9893	1.99333	-50.4456	-2.4181	-1.75949
100719.1	2019-10-07	Iso #4	week 4	26	G13.1	17.5	-39.3011	625.4		-65.2674	89.8646	-34.2407	3.16	-43.3044	-2.63577	-2.07567
100719.2	2019-10-07	Iso #4	week 4	26	G13.1		-52.0162	831.665		-63.6033	80.6397	-33.4244	3.1	-46.257
100719.3	2019-10-07	Iso #4	week 4	26	G13.1	12.2	-42.4617	788.868		-67.2685	95.6987	-34.2712	2.208	-53.9795	-5.79928	-4.39034
100719.4	2019-10-07	Iso #4	week 4	26	G13.1	18.5	-43.1009	1265.87		-65.9831	92.7121	-32.4097	2.59714	-55.0101	-3.36619	-2.94469
100719.5	2019-10-07	Iso #4	week 4	26	G13.1	11.2	-44.3151	763.285		-64.3126	84.1032	-28.8137	3.41333	-48.2381	-3.42412	-3.14511
100719.6	2019-10-07	Iso #4	week 4	26	G13.1	10.7	-47.6975	1206.48		-66.719	100.942	-34.5415	1.50286	-53.9943	-11.2273	-9.12218
100719.7	2019-10-07	Iso #4	week 4	26	G13.1	13.1	-38.7283	520.993		-63.7202	91.3895	-26.3367	3.73333	-49.408	-1.82885	-1.18906
100819.1	2019-10-08	Iso #4	week 4	22	G11.1	15.8	-37.1416	1324.8							-2.65415	-0.890819
100819.2	2019-10-08	Iso #4	week 4	22	G11.1	10.1	-45.2834	827.158		-62.6906	83.412	-22.9187	3.56	-44.9219	-3.53828	-2.09475
100819.3	2019-10-08	Iso #4	week 4	22	G11.1	10.3	-49.2276	963.292
100819.4	2019-10-08	Iso #4	week 4	22	G11.1	14.6	-55.3459	476.194		-65.9555	90.0796	-26.947	2.27333	-45.9544	-8.46597	-0.874059
100819.41	2019-10-08	Iso #4	week 4	22	G11.1		-46.6329	1017.34							-3.93996	-1.82752
100819.6	2019-10-08	Iso #4	week 4	22	G11.1	18.4	-44.4644	1141.17							-0.905592	-0.419424
100819.7	2019-10-08	Iso #4	week 4	22	G11.1	17.3	-46.5374	1233.7							-1.54531	0
100819.8	2019-10-08	Iso #4	week 4	22	G11.1	17.8	-58.8266	479.849		-64.1829	88.8513	-25.5432	2.41667	-55.6946	-4.23828	-2.09415
101019.1	2019-10-10	Iso #4	week 4	24	G11.1	13.9	-40.0293	354.227							-5.87206	-0.5129
101019.2	2019-10-10	Iso #4	week 4	24	G11.1	13.4	-45.0053	990.157							-4.57657	-1.68231
101019.3	2019-10-10	Iso #4	week 4	24	G11.1	13.8	-42.6648	929.229		-66.8616	89.8261	-24.1013	3.56	-48.9578	-10.1445	-3.51745
101019.4	2019-10-10	Iso #4	week 4	24	G11.1	13.8	-40.3292	1004.01		-64.6734	87.4762	-30.4749	1.892	-48.7976	-4.03861	-0.0357375
101019.5	2019-10-10	Iso #4	week 4	24	G11.1	11.2	-43.5474	1157.71		-66.0016	90.7427	-24.9111	4	-46.2646	-2.23143	-1.12883
101019.6	2019-10-10	Iso #4	week 4	24	G11.1	12.6	-38.9776	1134.65							-1.97139	0
101019.7	2019-10-10	Iso #4	week 4	24	G11.1	7	-37.8681	466.894		-66.3309	86.1113	-28.7679	2.67667	-50.2675	-5.8915	-2.03977
101019.8	2019-10-10	Iso #4	week 4	24	G11.1	12.7	-55.3753	517.075							-4.33547	-3.0174
101019.9	2019-10-10	Iso #4	week 4	24	G11.1	15.4	-39.0276	1138.08		-66.3477	94.4086	-29.007	3	-53.8178	-3.84229	-2.63083
111119.6	2019-11-11	Iso #4	week 4	22	G16.1	13.7	-48.7041	1163.63		-65.3836	105.018	-34.2407	3.085	-53.2532
111119.9	2019-11-11	Iso #4	week 4	22	G16.1	10	-37.5381	622.71		-67.3932	93.1297	-30.3345	3.86667	-47.5159	-3.63623	-0.868129
111219.4	2019-11-12	Iso #4	week 4	23	G16.1	11.2	-53.1405	372.651		-65.3086	85.0168	-19.989	4.912	-56.3416	-5.86079	-0.57424
111219.5	2019-11-12	Iso #4	week 4	23	G16.1	10.4	-47.3895	698.147		-66.7032	90.3035	-22.5321	2.73333	-46.7529	-3.59277	-1.06444
111219.7	2019-11-12	Iso #4	week 4	23	G16.1	15.8	-61.0695	535.858		-66.2956	90.0841	-22.2626	3.36	-43.7469	-2.94733	-2.25543
111219.71	2019-11-12	Iso #4	week 4	23	G16.1		-39.8202	733.41
111319.7	2019-11-13	Iso #4	week 4	24	G16.1	12.5	-59.4543	336.551		-64.2236	98.739	-26.7487	1.475	-60.5545
111319.8	2019-11-13	Iso #4	week 4	24	G16.1	11	-52.3363	493.793		-64.739	86.0533	-28.717	2.08857	-55.5899	-3.39286	-1.61082
111519.2	2019-11-15	Iso #4	week 4	26	G16.1	17	-51.0777	992.407		-66.8045	97.7188	-26.1536	2.61333	-44.1081	-4.32755	-3.26146
111519.4	2019-11-15	Iso #4	week 4	26	G16.1	17.4	-48.4527	811.047		-61.9042	102.084	-30.896	2.104	-53.009
060420.10	2020-06-04	Iso #4	week 4	22	G16.1	10.4	-46.312	577.796							-1.28962	-0.081576
060420.12	2020-06-04	Iso #4	week 4	22	G16.1	14.8	-41.9432	1044.84							-2.36538	-0.981098
060420.13	2020-06-04	Iso #4	week 4	22	G16.1	10.7	-57.9735	385.922		-67.081	84.1556	-27.8244	1.91	-60.0739	-4.20762	-1.14989
060420.14	2020-06-04	Iso #4	week 4	22	G16.1	10.9	-55.6085	409.952		-67.9455	96.6259	-29.3762	1.812	-61.3342	-1.78362	-0.483121
060420.9	2020-06-04	Iso #4	week 4	22	G16.1	9.8	-53.2765	713.014		-65.229	92.471	-26.5656	2.07667	-47.9736	-2.417	-1.38197
060820.3	2020-06-08	Iso #4	week 4	26	G16.1	11.3	-47.8378	919.782		-66.9651	90.8197	-30.2734	1.54667	-47.5566	-4.40466	-1.80161
061520.5	2020-06-15	Iso #4	week 4	22	G14.1	8.1	-42.0766	716.518		-67.446	83.8165	-27.5225	2.32	-42.7944	-1.4765	-0.28512
061520.6	2020-06-15	Iso #4	week 4	22	G14.1	9.1	-40.9165	824.151		-63.6302	83.2792	-28.1721	2.32857	-48.0129
061520.7	2020-06-15	Iso #4	week 4	22	G14.1	10.3	-40.4053	418.642		-70.0345	81.2643	-38.5234	1.64	-45.8577	-4.09166	-2.40912
061520.8	2020-06-15	Iso #4	week 4	22	G14.1	9	-40.3407	798.288		-65.5239	83.3652	-29.3045	2.35	-44.3344	-4.10364	-1.53316
061620.1	2020-06-16	Iso #4	week 4	23	G14.1	10.3	-46.1699	449.708		-65.1809	94.9889	-29.2892	1.38	-45.5246	-3.09126	-0.635335
061620.2	2020-06-16	Iso #4	week 4	23	G14.1	12.6	-39.7834	318.132							-1.86257	0
061620.3	2020-06-16	Iso #4	week 4	23	G14.1	20.5	-46.0265	1047.42
061620.4	2020-06-16	Iso #4	week 4	23	G14.1	17.6	-42.5255	433.531
061620.5	2020-06-16	Iso #4	week 4	23	G14.1	12.3	-46.202	662.984							-3.81383	-3.32616
061620.6	2020-06-16	Iso #4	week 4	23	G14.1	9.2	-53.5461	698.779		-66.2413	96.445	-36.4729	1.74	-55.3763	-6.10674	-4.3255
061720.2	2020-06-17	Iso #4	week 4	24	G14.1	8.1	-54.9603	334.39		-65.5952	97.7251	-30.2582	1.26333	-54.8604	-8.61513	-5.42095
061920.1	2020-06-19	Iso #4	week 4	26	G14.1	10.7	-44.6082	710.62		-66.5031	95.3727	-38.2996	1.13143	-61.07	-3.63863	-1.50819
071020.11	2020-07-10	Iso #4	week 4	22	G20.1	10.6	-52.9164	692.163		-66.5488	86.904	-27.0081	3.8	-46.0815	-3.98586	-1.17045
071020.13	2020-07-10	Iso #4	week 4	22	G20.1	13.1	-39.6769	759.253		-64.6956	93.9264	-30.7821	1.51	-45.2321
060420.1	2020-06-04	Iso #4 XE	week 4	22	G16.1	11.7	-40.5424	705.591		-68.1637	81.1184	-28.0304	2.56	-46.1884	-4.41692	-1.50676
060420.2	2020-06-04	Iso #4 XE	week 4	22	G16.1	9.2	-53.3208	546.421		-68.2154	94.0231	-29.6478	1.54	-55.1198	-4.73277	-1.10889
060420.3	2020-06-04	Iso #4 XE	week 4	22	G16.1	11.7	-39.2475	699.96							-9.4189	-3.91201
060420.4	2020-06-04	Iso #4 XE	week 4	22	G16.1	9.9	-50.9347	595.815		-65.0726	91.7602	-33.5083	1.38	-54.8782	-10.8202	-0.826
060420.5	2020-06-04	Iso #4 XE	week 4	22	G16.1	10.2	-38.3787	678.561		-65.7758	86.1834	-28.8217	1.70286	-53.5235	-3.92	-1.27276
060420.6	2020-06-04	Iso #4 XE	week 4	22	G16.1		-54.0729	1179.96							-8.2092	-4.0168
060420.7	2020-06-04	Iso #4 XE	week 4	22	G16.1	9.3	-48.2539	798.279		-67.9955	91.9884	-33.4961	1.54	-60.7117	-8.99339	-1.57218
060420.8	2020-06-04	Iso #4 XE	week 4	22	G16.1	11.8	-52.4624	501.529		-65.9289	96.6121	-37.0745	1.16	-57.36	-7.33685	-0.562107
060520.10	2020-06-05	Iso #4 XE	week 4	23	G16.1	15.5	-51.4385	491.765		-67.7546	100.384	-29.6997	2.096	-46.7651	-5.19544	-2.487
060520.11	2020-06-05	Iso #4 XE	week 4	23	G16.1	22.7	-43.3731	491.332
060520.12	2020-06-05	Iso #4 XE	week 4	23	G16.1	11.3	-37.4654	647.535		-67.2529	98.9836	-28.9993	1.505	-53.8635	-3.10795	-1.967
060520.13	2020-06-05	Iso #4 XE	week 4	23	G16.1	10.4	-42.7502	1057.95		-66.6367	92.4749	-29.8462	1.75333	-47.8109	-7.37897	-3.17284
060520.14	2020-06-05	Iso #4 XE	week 4	23	G16.1	9.7	-57.4153	318.352		-66.6108	101.169	-38.0127	1.16	-58.6792	-5.11249	-0.832
060520.15	2020-06-05	Iso #4 XE	week 4	23	G16.1	10.1	-54.4745	333.354		-66.151	97.7214	-31.6467	1.58	-51.4679
060520.7	2020-06-05	Iso #4 XE	week 4	23	G16.1	9.5	-62.1331	452.705		-68.0324	103.204	-32.3563	1.145	-63.385	-9.42824	-2.68671
060520.8	2020-06-05	Iso #4 XE	week 4	23	G16.1	11.5	-41.7524	812.36
060520.9	2020-06-05	Iso #4 XE	week 4	23	G16.1	10.2	-39.405	859.96		-63.3571	83.9107	-23.5214	2.68	-51.0457	-3.62892	-1.96
060820.4	2020-06-08	Iso #4 XE	week 4	26	G16.1	12	-50.6716	744.65		-68.8548	101.425	-29.808	1.23	-47.7905	-4.28668	-1.32595
060820.5	2020-06-08	Iso #4 XE	week 4	26	G16.1	9.7	-40.7536	893.639
060820.6	2020-06-08	Iso #4 XE	week 4	26	G16.1	12.5	-43.4697	720.957		-66.3779	84.3649	-29.1138	1.92	-45.5994
060820.7	2020-06-08	Iso #4 XE	week 4	26	G16.1	10.9	-45.4619	438.448		-66.3181	85.0559	-28.8696	1.83333	-44.9015
061520.10	2020-06-15	Iso #4 XE	week 4	22	G14.1	8.7	-52.5996	455.477		-65.1068	82.2119	-26.7029	2.1	-53.6041	-5.68345	-1.498
061520.12	2020-06-15	Iso #4 XE	week 4	22	G14.1	9.9	-47.5418	720.315		-67.104	94.0815	-32.1045	1.46	-51.1169	-3.19946	-2.784
061520.13	2020-06-15	Iso #4 XE	week 4	22	G14.1	11.1	-45.8611	613.761		-65.6319	92.6705	-29.3732	1.25667	-54.9774	-4.55785	-1.99427
061520.14	2020-06-15	Iso #4 XE	week 4	22	G14.1	10.6	-55.3075	545.773		-65.7611	101.161	-34.5581	1.072	-60.6445	-4.21596	-1.23656
061520.15	2020-06-15	Iso #4 XE	week 4	22	G14.1	10	-57.9929	466.676		-67.141	102.901	-32.4951	1.024	-53.8635	-4.80387	-1.52465
061520.16	2020-06-15	Iso #4 XE	week 4	22	G14.1	11	-46.3212	536.659		-67.2098	94.4823	-37.4512	1.364	-58.431	-5.80852	-3.24901
061520.9	2020-06-15	Iso #4 XE	week 4	22	G14.1	10.7	-36.9369	773.602							-7.28311	-4.927
061720.10	2020-06-17	Iso #4 XE	week 4	24	G14.1	13.5	-53.4506	358.779		-66.9508	94.1786	-31.3416	1.032	-54.4922	-6.6969	-4.73034
061720.11	2020-06-17	Iso #4 XE	week 4	24	G14.1	10.1	-44.4993	590.247		-66.1442	83.1059	-29.4312	1.752	-48.3948	-7.4945	-5.5825
061720.12	2020-06-17	Iso #4 XE	week 4	24	G14.1	9.6	-47.5134	422.261		-66.6762	86.711	-32.1045	1.39	-52.0412	-6.95856	-4.87655
061720.13	2020-06-17	Iso #4 XE	week 4	24	G14.1	11.6	-48.998	692.815		-67.1552	98.815	-33.3296	1.44	-55.3066	-7.37999	-3.41138
061720.8	2020-06-17	Iso #4 XE	week 4	24	G14.1	7.4	-49.219	626.272		-67.5563	96.4361	-31.4026	1.34	-49.0723	-6.90193	-3.5622
061720.9	2020-06-17	Iso #4 XE	week 4	24	G14.1	12.8	-40.7986	332.569							-4.53975	-3.49355
071020.1	2020-07-10	Iso #4 XE	week 4	22	G20.1	9.2	-41.8167	481.693		-66.4609	84.5395	-28.5645	1.644	-50.5249	-6.87899	-2.71362
071020.10	2020-07-10	Iso #4 XE	week 4	22	G20.1	11.1	-46.3767	518.93		-67.0671	85.6015	-34.7239	1.69333	-57.7698	-5.11817	-2.17354
071020.2	2020-07-10	Iso #4 XE	week 4	22	G20.1	12.5	-55.5477	340.415		-63.2242	90.8578	-28.8696	1.2	-55.3436	-7.95025	-2.08544
071020.3	2020-07-10	Iso #4 XE	week 4	22	G20.1	15.9	-52.1899	589.321		-63.7259	82.7637	-28.1626	1.55	-54.6519	-5.42818	-2.83542
071020.4	2020-07-10	Iso #4 XE	week 4	22	G20.1	11.7	-65.2104	994.973		-63.9401	90.273	-27.4963	1.88	-55.6908	-15.2226	-7.06635
071020.5	2020-07-10	Iso #4 XE	week 4	22	G20.1	10.9	-47.9727	1117.01		-67.0975	95.3072	-32.2189	1.3275	-48.8358
071020.6	2020-07-10	Iso #4 XE	week 4	22	G20.1	11.2	-60.7608	289.99		-66.177	91.5371	-29.01	1.324	-58.4717	-4.66386	-2.58518
071020.7	2020-07-10	Iso #4 XE	week 4	22	G20.1	15.6	-62.3173	536.726							-12.585	-5.23361
071020.8	2020-07-10	Iso #4 XE	week 4	22	G20.1	10.1	-51.174	683.573		-66.468	99.6178	-36.4265	1.1325	-57.6782	-6.76755	-2.44012
071020.9	2020-07-10	Iso #4 XE	week 4	22	G20.1	17.8	-49.258	945.504		-65.7829	91.7877	-35.1944	1.445	-52.1202	-6.6789	-6.18013
071120.1	2020-07-11	Iso #4 XE	week 4	23	G20.1	9.3	-59.8241	602.992		-65.8909	104.149	-30.9525	1.2875	-58.0826	-10.1974	-2.16405
071120.10	2020-07-11	Iso #4 XE	week 4	23	G20.1	11.9	-47.352	904.925		-65.9228	87.1805	-29.3884	1.84	-54.4782	-4.07178	-3.67013
071120.2	2020-07-11	Iso #4 XE	week 4	23	G20.1	10.5	-60.1448	527.191		-67.11	101.963	-37.3116	1.2025	-55.7137	-14.4009	-4.06277
071120.3	2020-07-11	Iso #4 XE	week 4	23	G20.1	9.3	-52.8939	767.625		-66.7327	100.123	-33.4702	1.275	-61.8553	-5.67308	-5.59253
071120.4	2020-07-11	Iso #4 XE	week 4	23	G20.1	9.6	-56.7549	328.046		-66.0582	99.475	-32.3385	1.36667	-55.5827	-9.50748	-1.73136
071120.5	2020-07-11	Iso #4 XE	week 4	23	G20.1	12.1	-42.6933	936.063		-66.3951	88.4796	-24.058	2.98	-48.8485	-7.93235	-6.00827
071120.6	2020-07-11	Iso #4 XE	week 4	23	G20.1	10	-51.8761	353.726		-66.2817	85.2229	-27.4353	1.52667	-52.0935	-5.28874	-2.61559
071120.7	2020-07-11	Iso #4 XE	week 4	23	G20.1	11.4	-56.9808	478.294		-67.2911	95.4054	-30.3879	1.14	-52.3911	-9.94332	-6.98955
071120.8	2020-07-11	Iso #4 XE	week 4	23	G20.1	11.1	-47.7553	1171.75		-66.926	94.4605	-35.8047	1.6425	-47.1191	-7.60281	-7.10677
071120.9	2020-07-11	Iso #4 XE	week 4	23	G20.1	11.1	-41.0196	1104.07		-65.5553	97.8925	-34.3666	1.115	-56.16	-7.27512	-6.44622
