# Supplementary material for: Dyshomeostatic modulation of Ca2+-activated K+ channels in a human neuronal model of KCNQ2 encephalopathy
Source: eLife. 2021 Feb 5;10:e64434. doi: 10.7554/eLife.64434 (PMC7864629; doi:10.7554/eLife.64434)
Supplement: Figure 6—source data 2. [file elife-64434-fig6-data2.xlsx]

## Sheet: Q204iso chronicXE MEAs D15-31
Cell type	Differentiation	plate	Neuron count	D15 Weighted Mean Firing Rate (Hz)	D17 Weighted Mean Firing Rate (Hz)	D19 Weighted Mean Firing Rate (Hz)	D22 Weighted Mean Firing Rate (Hz)	D24 Weighted Mean Firing Rate (Hz)	D26 Weighted Mean Firing Rate (Hz)	D29 Weighted Mean Firing Rate (Hz)	D31 Weighted Mean Firing Rate (Hz)	D15 ISI Coefficient of Variation - Avg	D17 ISI Coefficient of Variation - Avg	D19 ISI Coefficient of Variation - Avg	D22 ISI Coefficient of Variation - Avg	D24 ISI Coefficient of Variation - Avg	D26 ISI Coefficient of Variation - Avg	D29 ISI Coefficient of Variation - Avg	D31 ISI Coefficient of Variation - Avg	D15 # of bursts	D17 # of bursts	D19 # of bursts	D22 # of bursts	D24 # of bursts	D26 # of bursts	D29 # of bursts	D31 # of bursts	D15 Burst Frequency Hz	D17 Burst Frequency Hz	D19 Burst Frequency Hz	D22 Burst Frequency Hz	D24 Burst Frequency Hz	D26 Burst Frequency Hz	D29 Burst Frequency Hz	D31 Burst Frequency Hz	D15 # of Spikes per burst	D17 # of Spikes per burst	D19 # of Spikes per burst	D22 # of Spikes per burst	D24 # of Spikes per burst	D26 # of Spikes per burst	D29 # of Spikes per burst	D31 # of Spikes per burst	D15 Burst Percentage - Avg	D17 Burst Percentage - Avg	D19 Burst Percentage - Avg	D22 Burst Percentage - Avg	D24 Burst Percentage - Avg	D26 Burst Percentage - Avg
Iso #4	D16.1	9	232	0.152105	0.115867	0.189028	0.258833	0.298636	0.104583	0.082667	0.122667	1.35054	1.44977	1.40211	1.87684	1.84847	1.36085	1.33109	1.30928	57	46	53	85	117	19	10	17	0.031667	0.013939	0.016061	0.021795	0.024375	0.010556	0.005556	0.028333	6.46866	6.1	4.80119	8.44951	7.57321	6.33929	8.11111	7.6875	12.2128	14.8107	10.5655	24.6992	24.5626	8.64326
Iso #4	D16.1	9	353	0.14	0.179608	0.101296	0.195238	0.180392	0.127436	0.079	0.143333	1.20174	1.37436	1.21385	1.31508	1.35148	1.43556	0.927522	1.06199	2	25	23	32	22	19	1	0	0.003333	0.016667	0.012778	0.015238	0.010476	0.010556	0.003333	0	6.5	9.16786	7.43056	6.83532	9.71905	7.64167	5	0	1.05778	9.12126	6.85731	9.47487	10.9274	8.04703
Iso #4	D16.1	9	302	0.236222	0.182941	0.227387	0.328431	0.224896	0.229677	0.165287	0.124861	1.26315	1.35467	1.2996	1.44821	1.42337	1.70139	1.66803	1.15138	7	24	62	86	59	74	44	10	0.011667	0.008	0.014762	0.015088	0.012292	0.012333	0.008148	0.004167	35.25	5.86143	6.67381	7.9104	9.02869	9.09015	8.64815	5.70833	1.97331	7.84255	12.8329	16.803	13.1119	21.6139
Iso #4	D16.1	9	289	0.13087	0.251616	0.265263	0.348571	0.32	0.334737	0.400417	0.406042	1.26797	1.55932	1.59359	1.4781	1.53156	1.51617	1.49287	1.59906	24	87	102	118	140	98	73	114	0.01	0.022308	0.02	0.017101	0.016667	0.013611	0.022121	0.015833	7.88889	11.665	8.55432	9.04364	9.16223	10.4691	11.1679	13.0638	3.39182	15.0484	14.8821	17.3221	20.1346	19.5013
Q2-04	D16.1	9	205	0.176556	0.189118	0.25813	0.292929	0.262	0.257333	0.342267	0.203623	1.67737	1.62586	1.9293	1.89856	2.09937	1.86513	1.95556	1.55497	44	64	205	176	194	118	80	47	0.009778	0.011852	0.031061	0.025507	0.021556	0.020702	0.019048	0.015667	7.07833	7.136	13.0978	8.00438	9.62587	11.351	11.3343	8.50576	17.2083	16.1588	27.8272	25.5532	39.8815	29.4784
Q2-04	D16.1	9	191	0.171724	0.21125	0.192059	0.184368	0.237576	0.195641	0.127018	0.131212	1.97436	2.24555	1.92601	1.98899	1.64415	2.05279	1.74046	1.47043	71	111	122	101	78	53	30	11	0.014792	0.020556	0.021404	0.017719	0.021667	0.011042	0.0125	0.009167	7.11406	8.01882	8.96559	9.0944	9.65694	11.6059	11.8667	10.5417	21.3038	23.7436	24.2126	31.0745	17.6985	25.6852
Q2-04	D16.1	9	235	0.12303	0.222727	0.238682	0.228333	0.298333	0.185729	0.131579	0.204921	1.63027	1.95059	1.81509	1.83338	1.69416	1.9586	1.62479	1.56171	43	113	145	114	153	99	44	82	0.011026	0.016377	0.016667	0.016522	0.024286	0.015	0.014667	0.021026	6.07628	8.2852	8.86775	8.58051	9.16013	9.36979	7.27809	6.45192	13.1672	25.8199	34.2558	25.7684	23.9885	27.6522
Iso #4 XE chronic	D16.1	9	141	0.105439	0.347833	0.384839	0.280686	0.228854	0.301471	0.260115	0.251471	2.20963	2.21009	2.29136	2.38146	1.9322	2.02184	2.01739	1.71629	38	71	141	110	78	107	76	54	0.009744	0.018205	0.024737	0.014667	0.011818	0.015507	0.015833	0.008182	7.54396	12.2879	14.2622	12.8301	11.3156	11.8112	14.2229	13.1242	25.498	26.5376	27.1968	32.1121	26.0045	26.8467
Iso #4 XE chronic	D16.1	9	267	0.191579	0.30875	0.261786	0.215517	0.383086	0.197889	0.255556	0.319444	2.34036	3.47549	2.89048	2.43199	2.87267	2.04931	2.10502	2.33958	56	108	118	71	118	86	62	106	0.015556	0.02	0.020702	0.012456	0.020702	0.015088	0.013778	0.015362	11.9147	18.2658	13.7766	17.0569	18.2359	11.5582	11.6045	15.2989	27.5843	48.7512	35.0421	33.5838	35.1634	28.3545
Iso #4 XE chronic	D16.1	9	231	0.175556	0.198571	0.323485	0.256897	0.364405	0.243704	0.19375	0.348235	1.80777	2.49352	2.49934	2.01276	2.38084	1.81043	1.41548	2.36944	54	73	98	94	96	67	9	51	0.013846	0.017381	0.018148	0.017407	0.016	0.013958	0.005	0.013077	9.70949	12.4038	11.1706	11.3154	19.6265	11.7515	8.125	15.819	20.5334	27.7088	29.3458	28.2032	31.2794	21.2087
Iso #4 XE chronic	D16.1	9	238	0.226	0.267407	0.365784	0.242883	0.3165	0.439333	0.197634	0.23321	2.63622	2.63599	2.42107	2.04542	2.23346	1.85425	1.81284	1.83325	95	96	144	101	163	134	63	54	0.016667	0.02	0.016	0.014638	0.018736	0.017867	0.012353	0.012857	10.0861	18.7689	12.5394	12.485	12.7544	12.693	12.4353	14.6594	37.7659	27.2641	45.9506	24.2113	32.9328	24.419
Iso #4	D16.1	10	145	0.167576	0.300159	0.314516	0.293021	0.308986	0.370667	0.224561	0.562353	1.49789	1.22137	1.32904	1.48037	1.61032	1.41799	1.34566	1.76044	34	25	102	91	104	71	56	147	0.028333	0.011905	0.034	0.016852	0.028889	0.03381	0.023333	0.054444	6.86905	5.96429	7.76445	7.18015	8.90101	8.81636	6.7735	10.3985	8.42314	5.67563	6.88254	13.3409	15.765	10.0622
Iso #4	D16.1	10	225	0.161429	0.249048	0.183472	0.180784	0.402738	0.267812	0.379444	0.308621	1.40246	1.24216	1.28006	1.29793	1.62741	1.46529	1.51512	1.6169	18	53	48	65	117	85	142	106	0.012	0.025238	0.017778	0.014444	0.021667	0.018889	0.02254	0.01963	6.31667	8.26667	6.37208	6.13644	9.41235	10.265	10.1353	8.65739	7.04232	9.34923	10.3941	11.4075	14.2883	14.5636
Iso #4	D16.1	10	280	0.08125	0.082444	0.172857	0.260794	0.238421	0.154167	0.271296	0.337424	1.02367	1.21089	1.65306	1.5725	1.57611	1.33822	1.37628	1.53291	0	10	63	64	63	24	30	70	0	0.016667	0.023333	0.013333	0.0175	0.008889	0.011111	0.016667	0	4.77778	8.14471	6.27917	9.0369	9.38333	10.5432	9.34503	0	1.91645	18.4078	17.6237	15.4523	8.53994
Iso #4	D16.1	10	232	0.110513	0.213793	0.386237	0.377417	0.315104	0.27641	0.324444	0.166667	1.51795	1.38046	1.50643	1.48719	1.30419	1.12028	1.18898	1.1711	6	50	143	125	79	66	38	19	0.01	0.016667	0.036667	0.019841	0.017556	0.036667	0.014074	0.010556	25.2	6.74405	12.5138	8.89616	8.98203	10.1565	13.0623	6.56944	5.93847	10.9537	18.2584	18.4778	10.5824	7.65376
Q2-04	D16.1	10	222	0.142	0.191556	0.243793	0.246765	0.274928	0.381296	0.408	0.479919	1.65872	1.50888	1.78309	2.05222	2.14842	1.9971	1.90974	1.90463	35	58	102	118	190	178	124	162	0.011667	0.019333	0.018889	0.016389	0.02043	0.023733	0.018788	0.02	5.725	7.48556	7.27008	10.583	11.1158	11.9227	13.9437	13.6576	11.9998	10.8781	19.4783	28.3928	35.6574	28.7374
Q2-04	D16.1	10	181	0.248182	0.290407	0.312955	0.465556	0.675031	0.630189	0.817124	0.892681	2.10715	1.85114	2.1048	2.17569	2.02502	1.89948	2.3301	2.34633	135	186	213	300	327	239	315	337	0.020455	0.022963	0.020882	0.026316	0.024222	0.02213	0.02561	0.029561	8.8601	8.68829	9.97276	12.4703	12.5421	14.4585	18.7566	18.7324	26.559	29.0327	38.032	36.3037	37.3804	28.7112
Q2-04	D16.1	10	226	0.232778	0.221458	0.187273	0.314571	0.306667	0.301389	0.251417	0.519222	1.76909	1.715	1.89846	1.92616	1.97387	1.92038	1.61271	1.65331	53	90	111	147	116	92	116	136	0.016061	0.013043	0.015417	0.021304	0.015467	0.01614	0.016111	0.02386	8.25666	10.0337	8.06821	9.9019	11.6278	14.3798	9.75207	12.7592	12.7427	27.2156	27.1867	25.9231	27.8574	21.0265
Q2-04	D16.1	10	465	0.392716	0.984167	0.81125	0.364815	0.456	1.31444	1.22667	1.17444	1.26675	1.43646	1.32263	1.74546	1.2942	1.51615	1.63792	1.68777	9	204	53	20	19	78	55	78	0.004286	0.045333	0.022083	0.013333	0.015833	0.0325	0.030556	0.028889	12.3571	8.03844	12.6215	17.2714	11.6514	16.1045	17.2989	16.0969	6.23072	19.1148	12.139	17.2017	8.76868	19.2384
Iso #4 XE chronic	D16.1	10	224	0.262361	0.247292	0.54748	0.776667	0.812636	0.856829	0.946449	1.20173	2.49246	2.55177	3.21597	2.96531	2.48421	2.11238	2.38436	2.85087	114	130	262	332	298	233	263	291	0.02	0.018841	0.025686	0.031619	0.029216	0.025054	0.024352	0.021087	11.6525	12.4038	18.7065	20.3763	19.6528	20.8529	26.437	29.943	38.1693	32.4716	51.5892	50.5389	42.8155	31.5199
Iso #4 XE chronic	D16.1	10	238	0.157536	0.222444	0.293981	0.349	0.327984	0.328387	0.360833	0.421429	2.11003	2.31599	2.39424	2.44963	2.6215	2.09817	2.19735	2.67622	66	92	105	106	139	82	116	127	0.011579	0.01614	0.015217	0.016825	0.015977	0.013016	0.017576	0.014598	6.99461	11.4998	17.3421	14.9273	18.0394	17.7984	12.4238	18.5005	25.347	28.9152	33.9752	30.24	35.2421	26.1438
Iso #4 XE chronic	D16.1	10	229	0.23614	0.307172	0.340556	0.480769	0.521905	0.513566	0.635789	0.687105	2.64337	2.83772	2.6176	2.9295	2.5404	2.23858	2.45628	2.67046	121	109	154	210	191	180	167	207	0.014938	0.014533	0.018333	0.021875	0.024487	0.019355	0.019195	0.023793	14.9243	19.0906	14.784	17.5619	17.2585	15.9922	22.6401	18.7805	37.6684	41.8149	43.2413	47.5376	40.0746	35.0779
Iso #4 XE chronic	D16.1	10	270	0.258229	0.360463	0.374419	0.298559	0.289926	0.219314	0.16193	0.339333	2.32258	2.37037	3.07621	2.24025	2.14038	2.09554	1.69913	1.81671	119	160	196	149	132	68	50	107	0.017246	0.019753	0.019798	0.017738	0.014194	0.01193	0.011111	0.014267	11.7026	12.767	18.3857	14.0588	14.1953	14.7071	14.39	13.1731	32.9124	33.6177	50.4196	37.3151	35.3311	24.1472
Iso #4	D18.1	11	345	0.136154	0.204314	0.376667	0.444118	0.467381	0.528495	0.610286	0.620714	1.39539	1.73148	1.56249	2.14082	1.42528	1.61033	1.62903	1.61665	3	58	54	60	97	205	226	213	0.005	0.024167	0.025714	0.015385	0.020208	0.031061	0.035873	0.037368	8.75	10.0936	9.55483	11.1266	7.97423	8.24156	11.9377	9.14006	1.88735	8.05783	12.1773	17.8962	11.3276	23.0993
Iso #4	D18.1	11	280	0.101667	0.223833	0.3265	0.2	0.255513	0.25386	0.202	0.239649	1.68297	1.34119	1.28761	1.28971	1.46847	1.28509	1.30672	1.18646	11	45	32	32	102	61	41	49	0.007333	0.015	0.015238	0.013333	0.037778	0.029048	0.027333	0.020417	10.2	6.46667	6.44444	7.48201	8.20374	8.17085	7.7948	7.01257	6.49516	7.69942	5.24272	7.42127	12.7472	8.70697
Q2-04	D18.1	11	275	0.130202	0.164533	0.121481	0.111979	0.210381	0.206667	0.490435	0.138095	1.88107	1.48244	2.08678	1.43744	1.51124	1.38454	1.80148	1.7747	63	49	50	37	69	35	84	9	0.012353	0.013611	0.011111	0.012333	0.015333	0.008974	0.0175	0.005	9.96364	6.91387	22.0222	7.89	11.2495	9.61637	14.4962	11	19.6894	15.3845	18.752	10.4535	13.89	9.46156
Q2-04	D18.1	11	288	0.087778	0.10957	0.153095	0.2448	0.273118	0.2855	0.27381	0.279583	1.40524	1.84118	1.54623	1.78135	1.59663	1.52219	1.49574	1.51914	20	58	54	59	88	48	49	43	0.007407	0.01381	0.013846	0.012292	0.015439	0.014545	0.013611	0.017917	6.39259	10.3952	9.30763	11.4537	8.95732	9.98737	9.25764	9.1766	8.79169	25.2457	13.8233	19.6299	15.7711	12.2301
Q2-04	D18.1	11	253	0.155867	0.220753	0.244804	0.193448	0.20359	0.262121	0.139778	0.112157	1.61256	1.87437	1.49204	1.73231	1.60339	1.90652	1.4911	1.14664	34	55	59	61	69	86	27	12	0.012593	0.012222	0.016389	0.011961	0.015333	0.019111	0.012857	0.013333	7.75529	9.95556	6.38349	9.96135	8.74913	8.71559	6.96429	7.7	8.03943	16.2577	11.3191	22.2873	17.3502	22.8192
Q2-04	D18.1	11	289	0.151389	0.157037	0.160152	0.172899	0.256282	0.221594	0.158462	0.280926	1.566	1.39976	1.50173	1.50072	1.57099	1.38524	1.56276	1.29192	32	42	25	32	51	26	22	17	0.009697	0.0175	0.011905	0.013333	0.014167	0.012381	0.012222	0.014167	6.90142	6.5191	12.119	7.79583	8.38829	12.0299	7.69213	8.76667	12.0572	9.21877	9.9722	9.88872	13.0729	7.62994
Iso #4 XE chronic	D18.1	11	349	0.216389	0.255632	0.322933	0.211587	0.202576	0.302917	0.115385	0.13	2.79202	2.21641	3.13522	2.34008	2.6145	2.93714	2.1238	1.80355	74	104	110	71	68	65	24	28	0.012982	0.020392	0.019298	0.018205	0.017436	0.021667	0.006667	0.013333	13.836	14.8826	17.5996	11.7057	14.2829	15.2906	24.7593	16.0744	23.8568	21.2484	27.0566	14.957	21.186	26.0701
Iso #4 XE chronic	D18.1	11	325	0.125965	0.265789	0.128986	0.105699	0.213188	0.111667	0.132424	0.058	2.53737	2.82459	1.67404	1.67463	2.46258	1.44569	1.81309	1.58939	35	105	54	56	74	15	20	8	0.012963	0.021875	0.016364	0.012444	0.017619	0.008333	0.008333	0.005333	11.2183	10.2402	9.02588	8.84233	14.569	5.94167	7.97917	5.2	9.83558	26.4734	9.43398	13.4615	15.0917	13.1335
Iso #4	D18.1	12	389	0.142982	0.187187	0.223246	0.225455	0.313636	0.361111	0.554537	0.364889	1.27094	1.34521	1.41031	1.21413	1.59156	1.37166	1.38416	1.19938	38	72	118	89	78	100	139	88	0.021111	0.024	0.024583	0.032963	0.018571	0.030303	0.035641	0.022564	4.725	8.5797	5.58271	6.6796	10.3736	6.85572	9.05151	6.37407	7.76956	9.9281	12.2998	9.24964	12.1113	7.7785
Iso #4	D18.1	12	299	0.069048	0.118667	0.077	0.215507	0.236	0.288267	0.298841	0.246275	1.0839	1.15321	1.13414	1.49008	1.45027	1.31654	1.49213	1.27755	9	4	7	73	39	62	82	32	0.015	0.006667	0.007778	0.020278	0.01625	0.022963	0.024848	0.015238	5.6875	5.25	5	5.75876	6.54762	5.49049	8.23898	5.75981	3.8	2.19828	2.87128	11.2325	7.88891	7.4054
Iso #4	D18.1	12	358	0.121818	0.16	0.211875	0.184921	0.123478	0.073611	0.098718	0.031667	1.34886	1.16194	1.15696	1.36527	1.24269	1.04658	1.25318	1.54087	19	11	2	70	23	8	5	1	0.021111	0.007333	0.006667	0.029167	0.012778	0.013333	0.016667	0.003333	7.47059	11.85	11	7.18006	6.66389	4.75	7.2	8	6.6155	7.15432	0.180121	9.03411	5.92204	2.09495
Iso #4	D18.1	12	293	0.162727	0.123333	0.221795	0.312533	0.392346	0.402581	0.407556	0.293444	1.04702	1.01944	1.18346	1.35697	1.24846	1.34973	1.15636	1.0267	16	5	57	72	81	50	43	39	0.026667	0.005556	0.027143	0.021818	0.015882	0.015152	0.020476	0.01625	4.06667	5.66667	6.037	6.84217	7.96387	6.73449	7.79167	7.1056	3.5019	3.02553	9.01975	8.70433	11.1726	7.70728
Q2-04	D18.1	12	297	0.199867	0.32619	0.390991	0.419275	0.379306	0.359302	0.508016	0.149333	1.76226	1.8165	2.04432	1.9041	1.71116	1.69623	1.35735	1.30131	80	170	177	241	218	158	160	63	0.020513	0.031481	0.024583	0.022952	0.021373	0.021944	0.026667	0.015	17.7994	11.0855	12.5121	11.0587	10.6811	9.73173	7.44771	6.14214	22.8703	22.0716	28.7806	30.796	29.8244	22.0356
Q2-04	D18.1	12	314	0.225287	0.295877	0.293838	0.36	0.327976	0.316129	0.411204	0.315309	1.65795	1.76882	1.63556	1.90831	1.58577	1.95064	2.06846	1.96341	78	129	135	121	119	128	176	118	0.017333	0.020476	0.023684	0.017536	0.019833	0.01641	0.022564	0.01873	10.16	12.0639	7.40358	11.8836	8.10551	10.2196	12.6078	12.2482	15.5151	22.1338	22.3067	27.3196	22.5529	34.8321
Q2-04	D18.1	12	286	0.190115	0.291275	0.296458	0.247701	0.169429	0.266786	0.608214	0.2155	1.38729	1.87273	1.89054	1.69499	1.45687	1.67999	1.54441	1.29242	71	124	103	137	88	78	72	64	0.021515	0.020667	0.020196	0.028542	0.017255	0.013	0.017143	0.030476	7.215	10.5042	10.7957	9.27098	7.58744	9.07047	11.3004	7.9666	11.6785	24.5665	22.1102	22.3543	16.4618	19.8473
Q2-04	D18.1	12	350	0.184194	0.322778	0.256905	0.268646	0.291979	0.261061	1.03683	0.344872	1.68304	1.95601	1.92334	1.49856	1.31653	1.3191	1.02537	1.19136	100	158	99	74	59	34	19	16	0.016667	0.026333	0.0165	0.018974	0.015128	0.014167	0.021111	0.017778	7.60837	13.173	7.10159	9.43045	8.02778	7.6375	13.4495	9.91111	24.1547	29.9575	27.1349	16.8226	7.88887	7.61494
Iso #4 XE chronic	D18.1	12	361	0.185079	0.286022	0.170247	0.284815	0.227284	0.267467	0.262105	0.39697	1.93343	2.3526	2.14792	2.22502	1.87169	2.18693	2.31594	2.04921	76	119	94	105	68	81	62	42	0.025333	0.018889	0.016491	0.019444	0.014167	0.016875	0.022963	0.015556	9.42111	12.3104	8.06558	12.13	11.6193	12.6111	14.6876	11.3636	20.9807	31.0058	33.4532	32.9695	26.9187	26.0513
Iso #4 XE chronic	D18.1	12	336	0.156984	0.207639	0.215867	0.2775	0.254444	0.298095	0.086667	0.124211	2.21982	2.63464	2.47289	2.16271	1.96981	1.80537	1.56479	1.81419	53	79	87	91	135	60	36	27	0.01359	0.016458	0.020714	0.015965	0.032143	0.022222	0.012	0.01125	11.8226	12.4176	13.0044	11.1266	11.2007	14.6993	5.79308	10.8785	24.3586	29.4147	27.5028	31.2792	27.392	19.7943
Iso #4 XE chronic	D18.1	12	288	0.078974	0.197368	0.196481	0.146508	0.291111	0.250455	0.411667	0.38	1.71532	2.28095	2.76669	1.55421	1.82773	1.95454	2.31969	2.31254	24	53	70	46	76	99	105	132	0.016	0.022083	0.015556	0.017037	0.015833	0.0165	0.021875	0.033846	6.58214	12.3691	9.99537	8.36756	9.939	7.70494	15.3189	14.4441	5.81374	20.1192	34.9932	13.9179	23.1818	34.0018
Iso #4 XE chronic	D18.1	12	301	0.238431	0.262667	0.289	0.338788	0.176349	0.247544	0.226087	0.381111	3.15439	2.86011	2.35854	3.1944	1.95291	1.90394	2.14109	1.92468	53	83	66	101	48	53	47	90	0.014722	0.017292	0.018333	0.016032	0.013333	0.017667	0.015667	0.033333	12.8431	13.7038	17.105	16.7462	10.7853	12.5152	22.7428	13.65	10.9859	39.483	24.5952	51.9908	26.7705	23.2633
[truncated: 18 more columns]
