# Supplementary material for: Dyshomeostatic modulation of Ca2+-activated K+ channels in a human neuronal model of KCNQ2 encephalopathy
Source: eLife. 2021 Feb 5;10:e64434. doi: 10.7554/eLife.64434 (PMC7864629; doi:10.7554/eLife.64434)
Supplement: Figure 6—source data 3. [file elife-64434-fig6-data3.xlsx]

## Sheet: Figure 6 chrXE qPCR source data
Sample name	Cell line	DIV	Dif Cohort	KCNMA1	KCNMB1	KCNMB2	KCNMB3	KCNMB4	KCNN1	KCNN2	KCNN3	KCNN4	KCND2	KCNT1	KCNQ3	KCNQ5	KCNQ2	HCN1	HCN2	KCNA1	KCNA2	KCNA4
Q204 #16.1 D32	Q2-04	D32	#16.1	1.02	1.65303	0.91	1.58	1.02	1.05	1.22	2.58	1.6	1.42	0.87	0.94	0.59	1.28	0.99	0.81	1.69	0.84	0.79
Iso#4 #16.1 D32	Iso#4	D32	#16.1	1.02	0.9381	1.05	1	1.04	0.96	1.04	1.11	1.07	1.03	1.01	1.03	1.1	1.08	1	1.01	0.86	0.99	1.01
Iso#4XE #16 D32	Iso#4 XE	D32	#16.1	1.22	1.47305	0.87	1.17	1.23	2.12	1.95	1.46	2.16	1.32	1.36	1.65	0.87	1.1	1.44	1.04	1.21	0.72	1.03
Q204 #18.1 D32	Q2-04	D32	#18.1	0.98	0.989764	0.74	1.06	1.27	1.4	2.26	0.72	2.06	0.61	2.77	0.75	1.13	1.39	0.91	0.97	1.18	0.53	1.03
Iso#4 #18.1 D32	Iso#4	D32	#18.1	0.93	0.982217	1.1	1.01	1.14	1.03	1	1.02	1.04	1	0.93	1.03	1.06	1.1	1.01	1.03	1	0.99	1.04
Iso#4XE #18 D32	Iso#4 XE	D32	#18.1	1.35	1.55998	1.3	1.71	1.27	1.15	1.44	1.15	1.29	1.07	1.04	0.98	1.13	1.44	1.98	1.13	1.5	1.3	1.36
Adult hBrain			Adult Brain	0.64	1.02909	0.67	0.39	0.69	0.67	0.86	0.92	0.9	0.53	6.84	0.77	2.65	0.27	3.36	1.71	4.37	3.46	1.52
Fetal hBrain			Fetal Brain	0.96	0.994144	1.02	1	1.03	0.95	0.98	1.02	0.98	0.97	1.02	1.03	1.07	1.01	1.01	1.03	1.03	0.95	1
Q204 #16.1 D32	Q2-04	D32	#16.1	1.22	1.87504	0.86	1.32	1.01	1.15	1.14	2.11	1.15	1.38	0.85	0.92	0.66	1.11	1	0.81	1.72	0.81	0.77
Iso#4 #16.1 D32	Iso#4	D32	#16.1	0.98	1.0619	0.95	1	0.96	1.04	0.96	0.89	0.93	0.97	0.99	0.97	0.9	0.92	1	0.99	1.14	1.01	0.99
Iso#4XE #16 D32	Iso#4 XE	D32	#16.1	1.19	1.53979	0.85	1.24	0.84	2.28	1.95	1.19	1.65	1.23	1.22	1.75	0.7	0.82	1.48	1	1.21	0.72	1.09
Q204 #18.1 D32	Q2-04	D32	#18.1	1.06	0.878018	0.57	1.3	0.96	1.35	2.28	0.64	1.48	0.54	2.72	0.63	0.9	1.24	0.89	0.99	1.15	0.56	1.18
Iso#4 #18.1 D32	Iso#4	D32	#18.1	1.07	1.01778	0.9	0.99	0.86	0.97	1	0.98	0.96	1	1.07	0.97	0.94	0.9	0.99	0.97	1	1.01	0.96
Iso#4XE #18 D32	Iso#4 XE	D32	#18.1	1.57	1.41463	1.28	1.87	0.97	1.28	1.53	1.14	1.45	1.12	2.94	1.02	1.54	1.13	1.87	1.01	1.5	1.35	1.04
Adult hBrain			Adult Brain	0.83	1.10982	0.68	0.38	0.67	0.7	0.73	0.87	0.95	0.55	5.75	0.67	2.42	0.24	3.28	1.56	4.73	3.39	1.52
Fetal hBrain			Fetal Brain	1.04	1.00586	0.98	1	0.97	1.05	1.02	0.98	1.02	1.03	0.98	0.97	0.93	0.99	0.99	0.97	0.97	1.05	1
