# Supplementary material for: Dyshomeostatic modulation of Ca2+-activated K+ channels in a human neuronal model of KCNQ2 encephalopathy
Source: eLife. 2021 Feb 5;10:e64434. doi: 10.7554/eLife.64434 (PMC7864629; doi:10.7554/eLife.64434)
Supplement: Supplementary file 1. [file elife-64434-supp1.xlsx]

## Sheet: Sheet1
Supplementary File 1: Single guide RNA and donor ssODN sequences for isoQ2-04+/+, related to Figure 1 and Figure 1-figure supplement 2 and 3
Single guide RNA (sgRNA) for R581Q KCNQ2 correction	5’- TAATTTGGGACAGCATGTCCAGG -3’
Donor single stranded repair oligonucleotide	5’-GTTCCTGGTGTCCAAGCGGAAGTTCAAGGAGAGCCTGCGGCCCTACGACGTGATGGACGTCATCGAGCAGTACTCAGCtGGC CAtCTGGACATGCTGTCCCgAATTAAGAGCCTGCAGTCCAGGCAAGAGCCCGCCTGCCTGTCCAGCAGGGGACAAGAACGGGGTGGGCTTCTGGGACAAAGCCCACT -3’
