# Supplementary material for: Dyshomeostatic modulation of Ca2+-activated K+ channels in a human neuronal model of KCNQ2 encephalopathy
Source: eLife. 2021 Feb 5;10:e64434. doi: 10.7554/eLife.64434 (PMC7864629; doi:10.7554/eLife.64434)
Supplement: Supplementary file 2. [file elife-64434-supp2.xlsx]

## Sheet: Off targets 
	Supplementary File 2: CRISPR off-targets primers for isoQ2-04+/+, related to Figure 1 and Figure 1-figure supplement 2 and 3.
	Off target sequence	Mismatches	Locus	Gene	PCR primer set		Size (bp)
	TAATTCGGGACAGCATGTCCAGG	1	chr20:-62044819 ENSG00000075043	KCNQ2	F	CCCTGCAGCTTCATGTCTGA	991
					R	CCGCCCAGAGACAGAGTCTA
	TAATGTAGGACAGAATGACCAGG	4	chr17:-38925735 ENSG00000263874	LINC00672	F	GCCATTTCTCTCCACCGACT	265
					R	AAAATCCACCGGTGCGTCA
	GCATTAGGGACAGCATATCCTGG	4	chr10:-52566622 ENSG00000148584	A1CF	F	TCTTGTCCAAGGGTTACCGC	241
					R	TCACTGAGTCCACATATTGTGTC
	TGATTGGGGAGAGCATGTACGGG	4	chr1:-118166119 ENSG00000183508	FAM46C	F	GGCGTCAGTTTGAGTTCAGTG	223
					R	CTGTACTTGAGAAGTCCCCCG
	TACTTTGAGGCAGCATGTCCTGG	3	chr17:-53086259 ENSG00000166263	STXBP4 (intronic)	F	TTCCCATATCCACACCTTTGCT	915
					R	AACTGATTGCAGACCAAGCG
	ACACTGGGGACAGCATGTCCAGG	4	chr19:-49508810 ENSG00000183207	RUVBL2 (intronic)	F	CTTCCAAGGCGACATGTGTT	216
					R	AAGGAAGTTACTGTGTGTGCCA
	TATTTTGGTACAGCATGTGCTGG	3	chr5:-35854559 ENSG00000168685	IL7R (intronic)	F	CTCTAGAAGGACTGGTGACGC	275
					R	TGGGTGAGTAACTGGGTTATGTC
	TCTTTTGCCACAGCATGTCCAGG	4	chr5:-154362044 ENSG00000164574	GALNT10 (intronic)	F	GGACCCGAACTTGGTTACTTG	866
					R	TGCCTCCGAGAGAACTCCA
	CAACTTGTGTCAGCATGTCCTGG	4	chr7:-96728415 ENSG00000127922	SHFM1 (intergenic)	F	CTTAGGATAGTGTGGCCAGGTT	282
					R	CCAGGTTTGACTTTCCTGTCAATA
	TAAGTGGGGATAGCATGGCCGGG	4	chr22:-40323179 ENSG00000100351	GRAP2 (intronic)	F	CAGGACTAGAATTGCTTCTCCCA	266
					R	AATGCCAGACCAACTTGCAC
	TAACTTTGAACAGCATGTCTTGG	4	chr8:-138177280 ENSG00000147724	FAM135B (intronic)	F	TTTTGGCTGGTGACCTTCTCTG	268
					R	GAGGCCTTCTTTTACATGGAGC
