# Supplementary material for: Dyshomeostatic modulation of Ca2+-activated K+ channels in a human neuronal model of KCNQ2 encephalopathy
Source: eLife. 2021 Feb 5;10:e64434. doi: 10.7554/eLife.64434 (PMC7864629; doi:10.7554/eLife.64434)
Supplement: Supplementary file 4. [file elife-64434-supp4.xlsx]

## Sheet: Sheet1
Supplementary File 4: Human specific RT-qPCR primers with splice isoform specificity, related to Figure 1, 4 and 6.
		NCBI Gene ID	Gene Target	Primer sequence: 5'->3' seq		Amplicon Size (bp)	Source	Blasted	Efficiency	Melt Curve
	Neuronal Markers	2290	FOXG1 NM_005249.5	F	ATACTGTGGTCATATGCCCGTG	165	E.K.	Yes	1.74	One peak
				R	AGCCTTTGAATTCCCTATAAGTTGA
		5454	POU3F2/ BRN2 NM_005604.4	F	TGGATTCCCATCAGGAAAGAGG​	170	E.K.	Yes	3.05	One peak
				R	AAAATCCCCCAAAACGGCAA
		57084	vGLUT2 (SLC17A6) NM_020346.3	F	GGGAGACAATCGAGCTGACG	156	E.K.	Yes	0.98	One peak
				R	TGCAGCGGATACCGAAGGA
	KCNQ2 Splice Variants	3785	KCNQ2 Var 1 NM_172107.3	F	TACGGGGCCTCCAGACTTAT	129	D.S.	Yes	1.44	One peak
				R	GCACGGGCTGCCTTTACTTG
		3785	KCNQ2 Var 2 NM_172106.2	F	CGCAAACTCAAACCTACGGG	139	D.S.	Yes	1.13	One peak
				R	CTGACCTTCTGGCTTGGAGA
		3785	KCNQ2 Var 3 NM_004518.5	F	GCACTTTGAGAAGAGGCGGA	144	D.S.	Yes	1.04	One peak
				R	ATAAGTCTGTACATGGGCACG
		3785	KCNQ2 Var 4 NM_172108.4	F	ACGGCAGAACTCAGAAGCAAG	155	D.S.	Yes	1.07	One peak
				R	TGAACTTCCGCTTGGACACC
		3785	KCNQ2 Var 5 NM_172109.2	F	GCCTGGAGATTCTACGCCAC	123	D.S.	Yes	0.86	One peak
				R	TTGCTTGGTGGCAGGTG
	KCNQ genes	3785	KCNQ2 All Var	F	CGTTCATCTACCACGCCTAC	148	D.S.	Yes	1.03	One peak
				R	TACTCCACGCCAAACACCAC
		3786	KCNQ3 All Var	F	CACCTTCCCATCCCAGCAAT	143	D.S.	Yes	1	One Peak
				R	GGAAGTCCAGCTTCTTCCCC
		56479	KCNQ5 Var 1-4	F	CAGTCCCACCAAAGTGCAGA	116	G.L.R.	Yes	1.07	One peak
				R	CAAGGGCTGTGTCAGCATCTA
	KCNMA/B genes (BK α and β subunit isoforms)	3778	KCNMA1 Var 1-6,10-16	F	TTCTCTACTTCGGCTTGCGG	111	D.S.	Yes	1	one peak
				R	ACACAGACACAAACACGGGG
		3779	KCNMB1 NM_004137.4	F	GAGCTGAAGGGCAAGAAGG	135	D.S.	Yes	1.09	One peak
				R	GCTGCCTGGGATGTAGGAG
		10242	KCNMB2 Var 1-3	F	GAGGACCGAGCTATTCTCCTG	153	PrimerBank: 31317294c1	Yes	1.09	One peak
				R	TGTTTCCGTGATGGACGCATT
		27094	KCNMB3 Var 1-5	F	GGGCTTCTCAGTCCTAATGTTC	91	D.S.	Yes	1.02	One peak
				R	AGTGCAGGTCGATTCTTCTCTC
		27345	KCNMB4 NM_014505.6	F	GATTGGTTCCCAGCCATTTAC	142	D.S.	Yes	0.96	One peak
				R	AATGAGAACGCCCACCAC
	KCNN genes (SK α subunit isoforms)	3780	KCNN1 NM_002248.4	F	TCGGGGAAACCCTCAAATGTG	118	PrimerBank: 25777642c1	Yes	1.07	One peak
				R	CCATGACGACGATGCCAAAC
		3781	KCNN2 Var 1-3,5	F	TTGATTGGTAGCATCCACGC	124	D.S.	Yes	0.98	One peak
				R	ACCGCTCAGCATTGTAAGTGA
		3782	KCNN3 Var 1-5	F	AAGCGGAGAAGCACGTTCATA	182	PrimerBank: 323276680c3	Yes	1.07	One peak
				R	CTGGTGGATAGCTTGGAGGAA
		3783	KCNN4 NM_002250.2	F	AAGCTCCGGGAACAAGTGAAC	123	PrimerBank: 25777651c3	Yes	1.23	One peak
				R	CGCCAGCGTGTCAATCTGT
	Other channel genes	3751	KCND2 NM_012281.3	F	GCCTCATCCCGGAAATCATCG	209	PrimerBank: 27436982c2	Yes	1.07	One peak
				R	CCCCGTGACATAGTAGAACACC
		57582	KCNT1 NM_020822.3	F	GACCCGTCCTTCCAGAACG	173	PrimerBank: 240255504c2	Yes	0.93	One peak
				R	ACGCGCACAATGTAGAGCA
		3736	KCNA1 NM_000217	F	CATCGTGGAAACGCTGTGTAT	237	D.S.	Yes	1.1	One peak
				R	CTAAAAACCCTTACCAAGCGGAT
		3737	KCNA2 All Var	F	AGACCACGAGTGCTGTGAGA	125	PrimerBank: 324021689c1	Yes	1.06	One peak
				R	AGTACCTCATTCGTTTCTTTGGG
		3739	KCNA4 NM_002233	F	ATGAGTGTTCCTACACGGATCT	106	PrimerBank: 325197144c2	Yes	0.99	One peak
				R	CCTGACACATTTATCACCACACG
		348980	HCN1 NM_021072.4	F	AGGCAATCGCTCCCATCAAT	99	D.S.	Yes	0.95	One peak
				R	CCGGTGGAGATTGTGTCCTC
		610	HCN2 NM_001194.4	F	ACTACATCATCCGCGAAGGC	108	D.S.	Yes	0.97	One peak
				R	AGCCATCGGACAGCTTCATC
		6334	SCN8A All Var	F	CTCCTGACTGGTCGAAGAATGT	121	G.L.R.	Yes	1.07	One peak
				R	CATGGGTCCCGTAAAAAGGTAA
	ANK3	288	ANK3 All Var	F	CCATGAGAGGAAGCCGTCAT	144	D.S.	Yes	0.88	One peak
				R	TGGCTAATCCCTCTCCTTCCA
	House keeping	2597	GAPDH All Var	F	ACAACTTTGGTATCGTGGAAGG	101	PrimerBank: 378404907c2	Yes	0.92	One peak
				R	GCCATCACGCCACAGTTTC
		2821	GPI Var 2,4,7	F	GTGTACCTTCTAGTCCCGCC	101	G.L.R.	Yes	1.04	One peak
				R	GGTCAAGCTGAAGTGGTTGAAGC
